# Supplementary material for: Enantioselective synthesis of chiral heterocycles containing both chroman and pyrazolone derivatives catalysed by a chiral squaramide
Source: Royal Society of Chemistry journal article supplement (doi:10.1039/c4ob02653e), 2015-01-01
Supplement: c4ob02653e1.pdf [file c4ob02653e1.pdf]

# **Enantioselective synthesis of chiral heterocycles containing both chroman and pyrazolone derivatives catalysed by a chiral squaramide**

Jun-Hua Li, Da-Ming Du\*

*School of Chemical Engineering and Environment, Beijing Institute of Technology,  
Beijing 100081, People's Republic of China*

[dudm@bit.edu.cn](mailto:dudm@bit.edu.cn)

## ***Supporting Information***

### **Contents**

|                                                                             |     |
|-----------------------------------------------------------------------------|-----|
| Copies of $^1\text{H}$ and $^{13}\text{C}$ NMR spectra of new products..... | S1  |
| Copies of HPLC chromatograms of new products.....                           | S17 |

Copies of  $^1\text{H}$  and  $^{13}\text{C}$  NMR spectra of new products

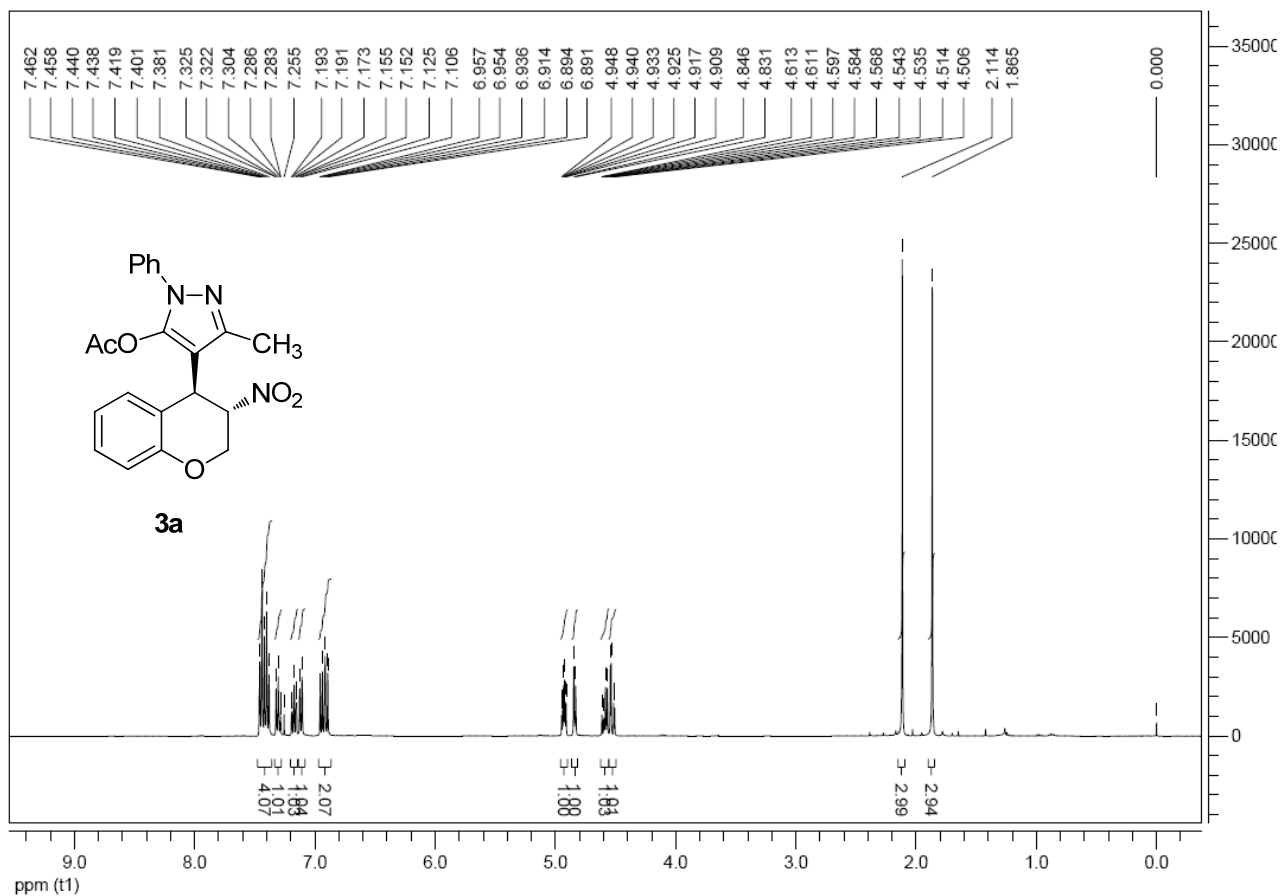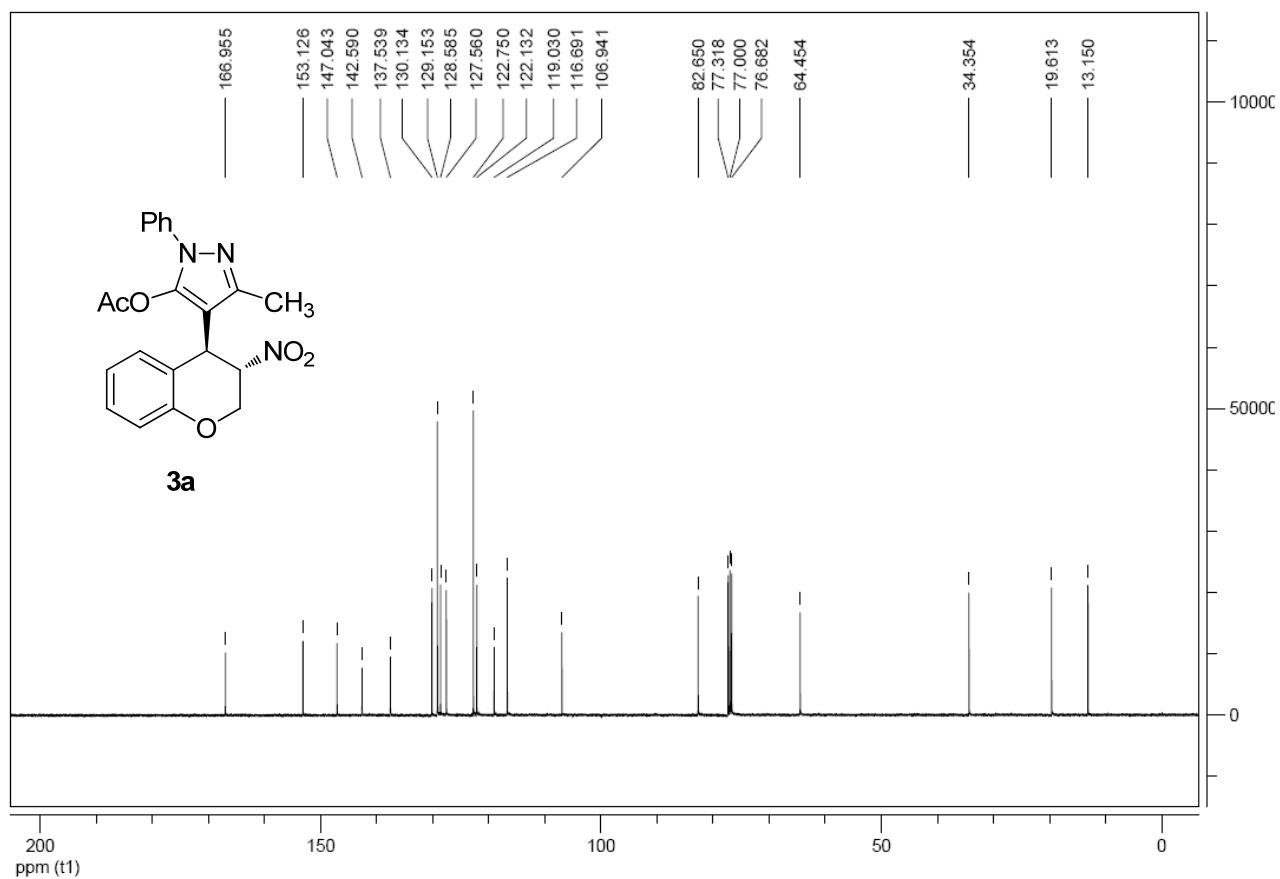

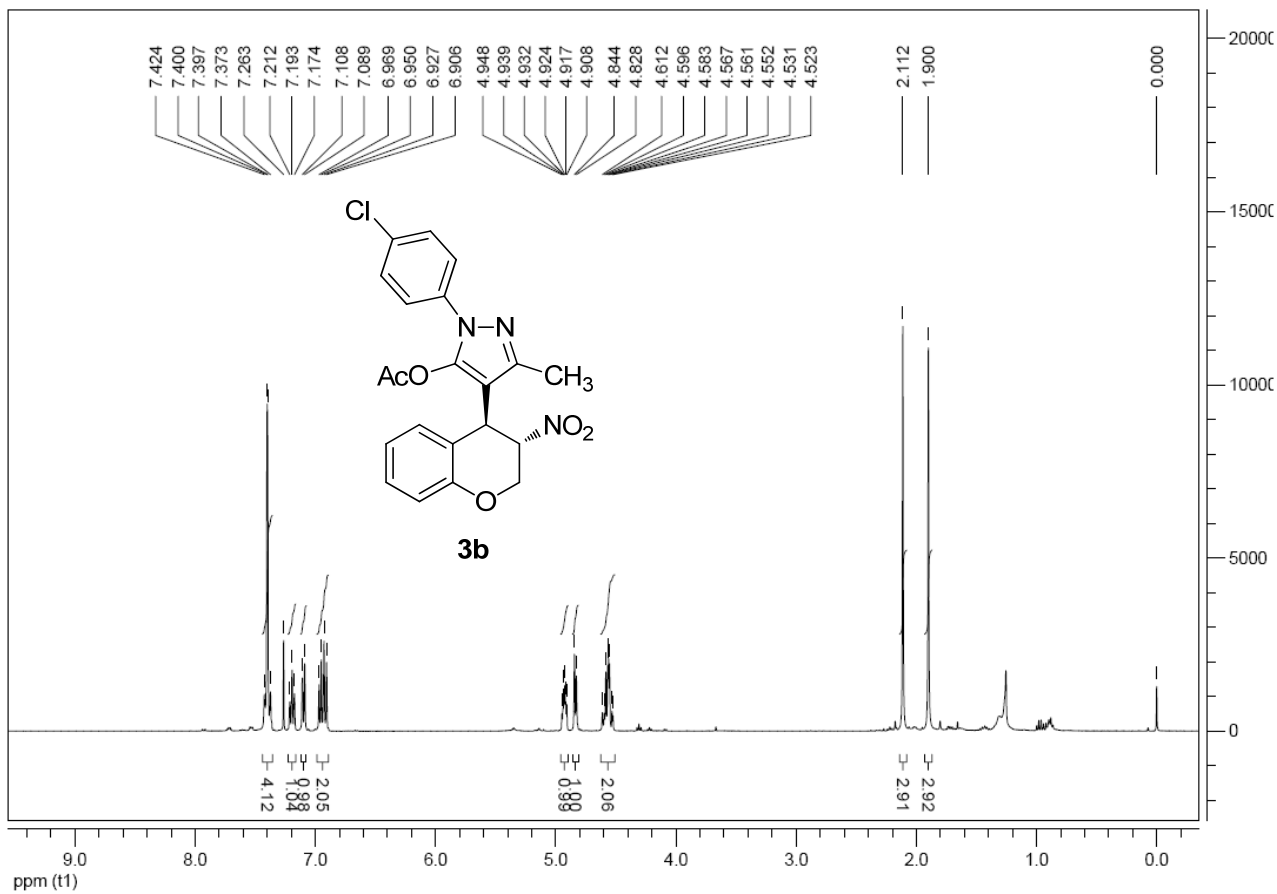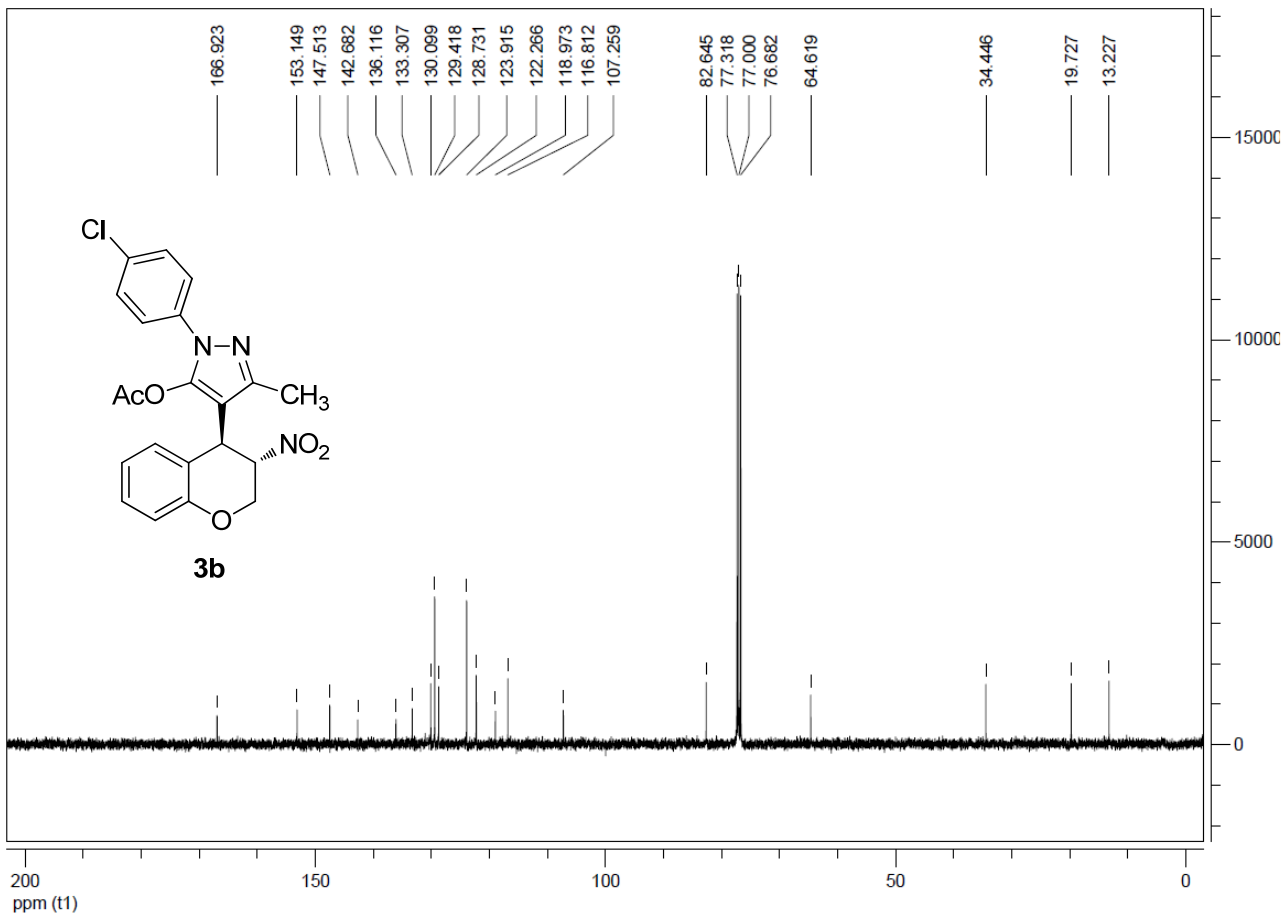

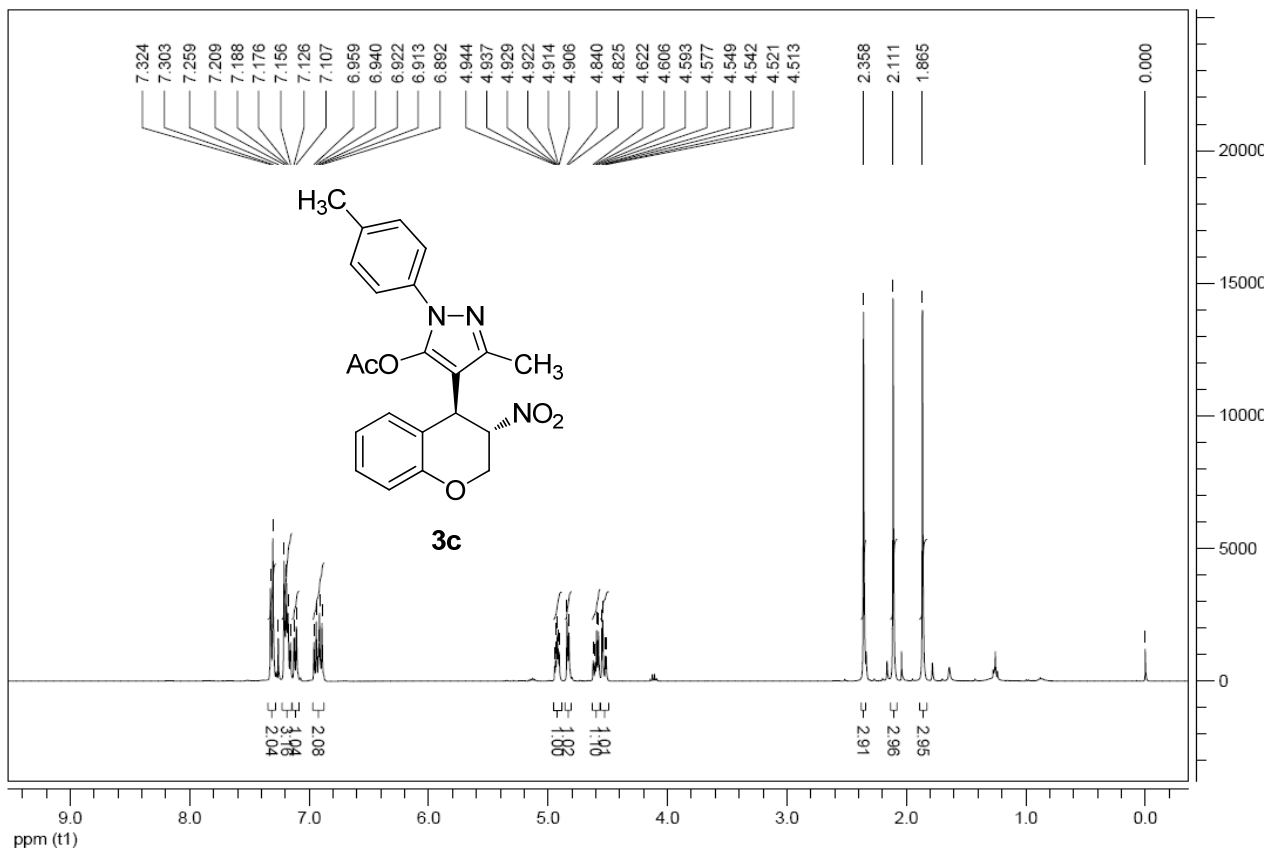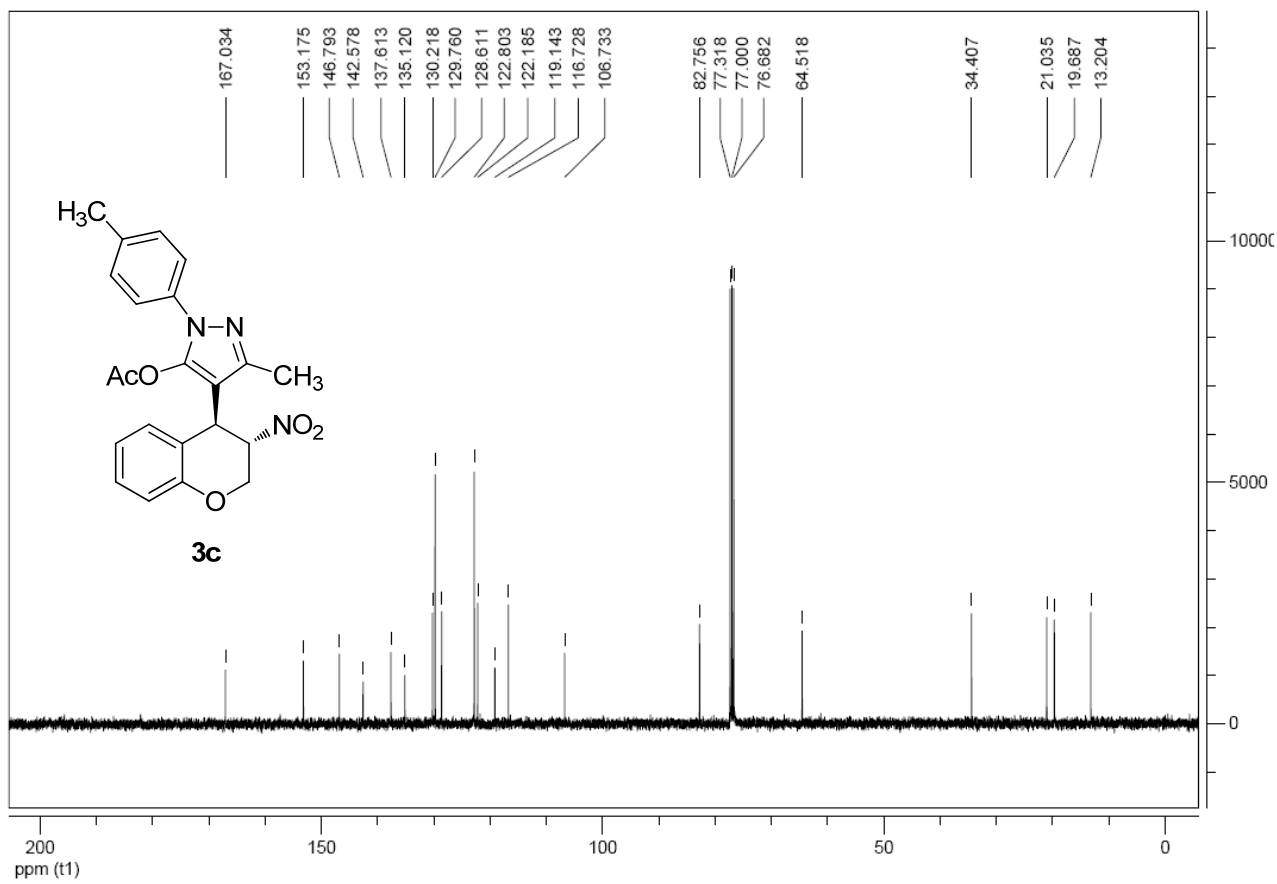

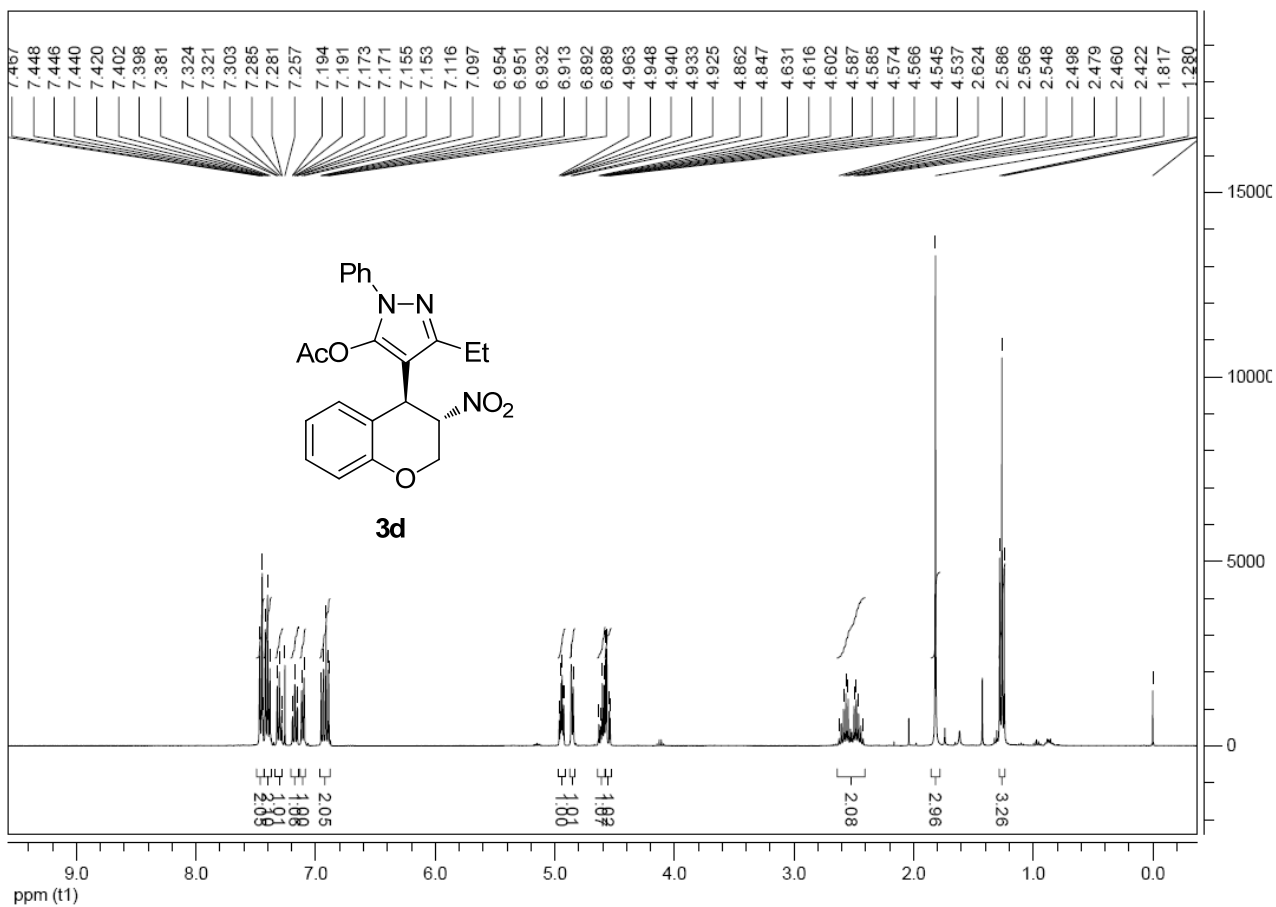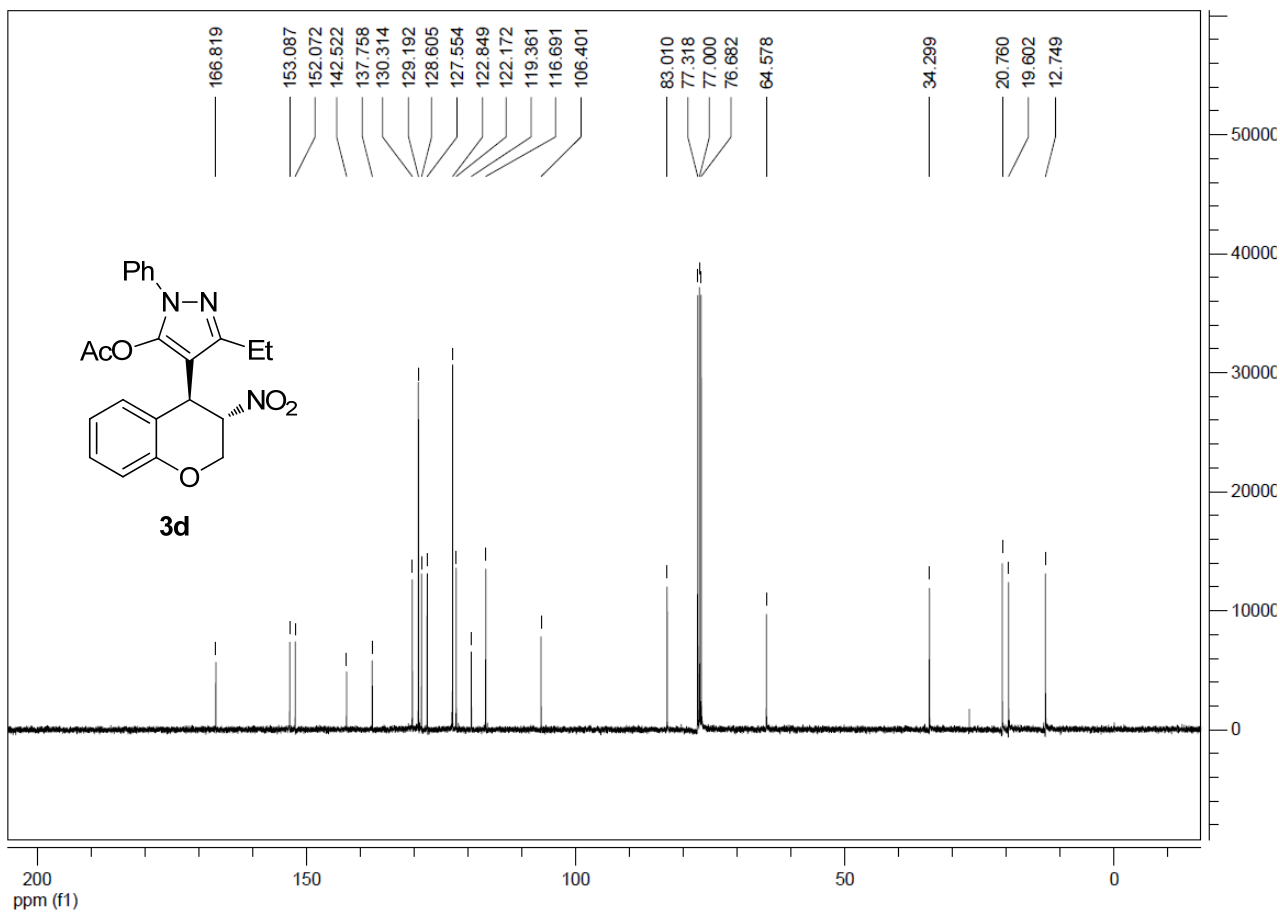

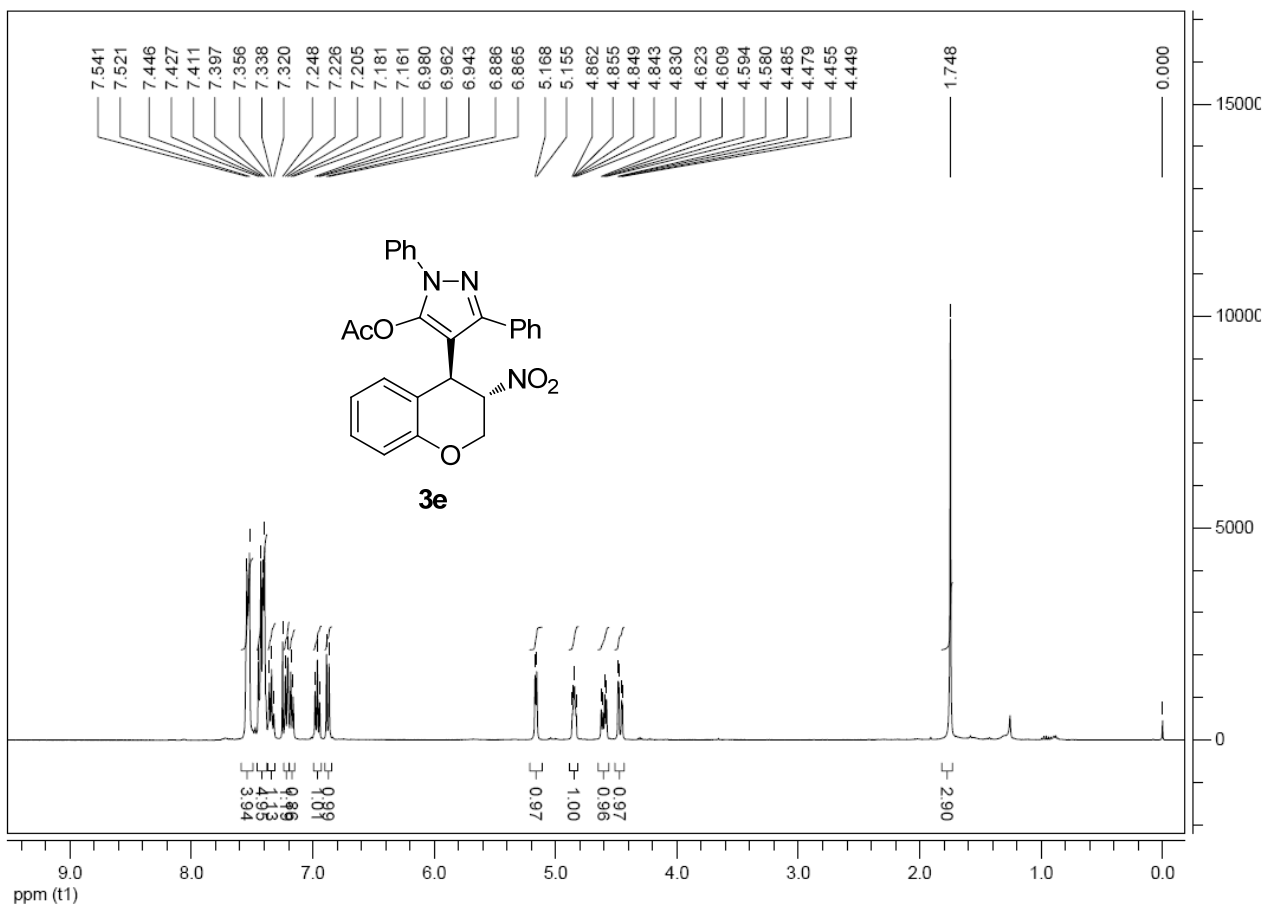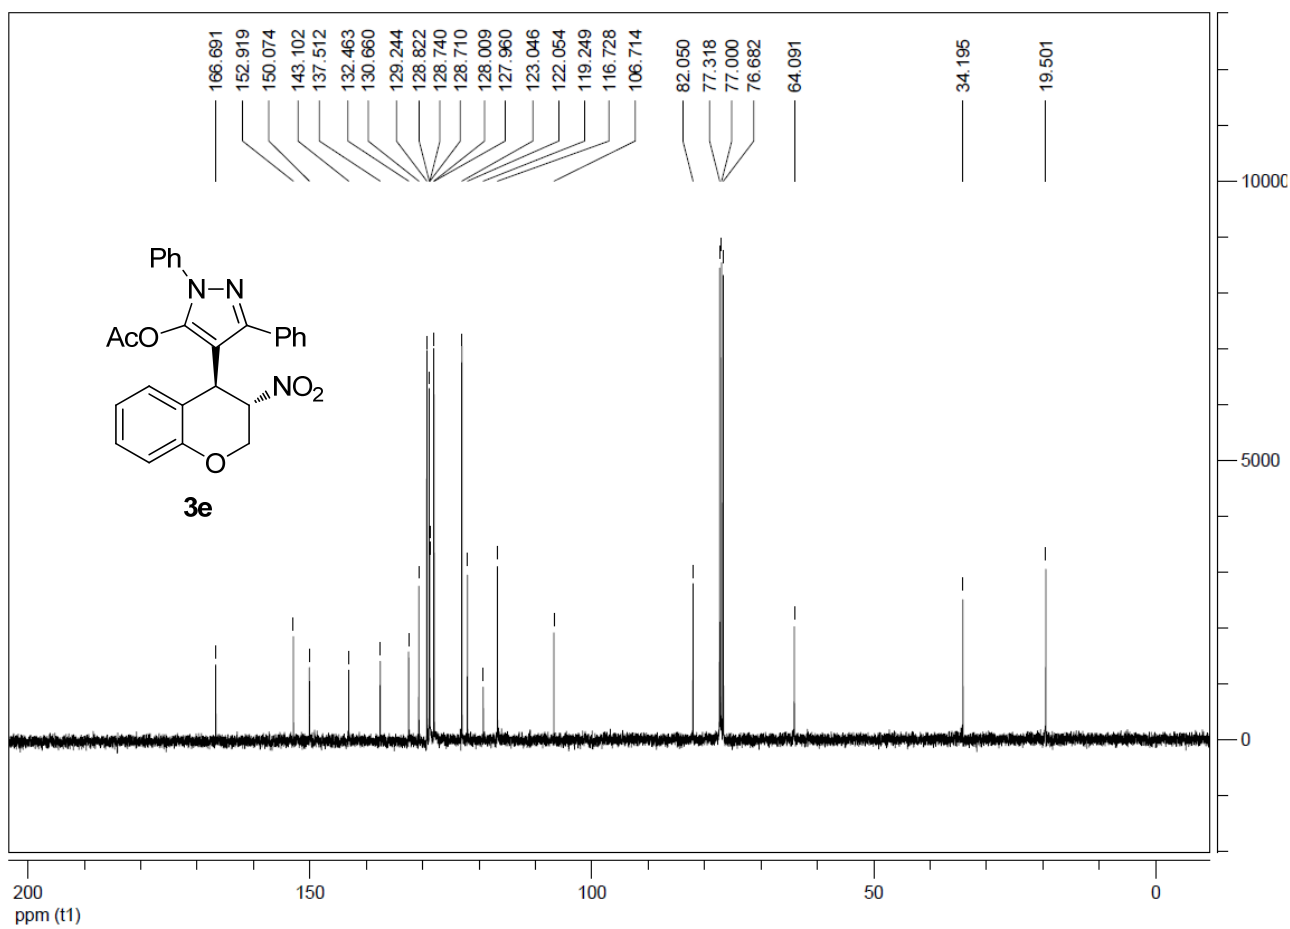

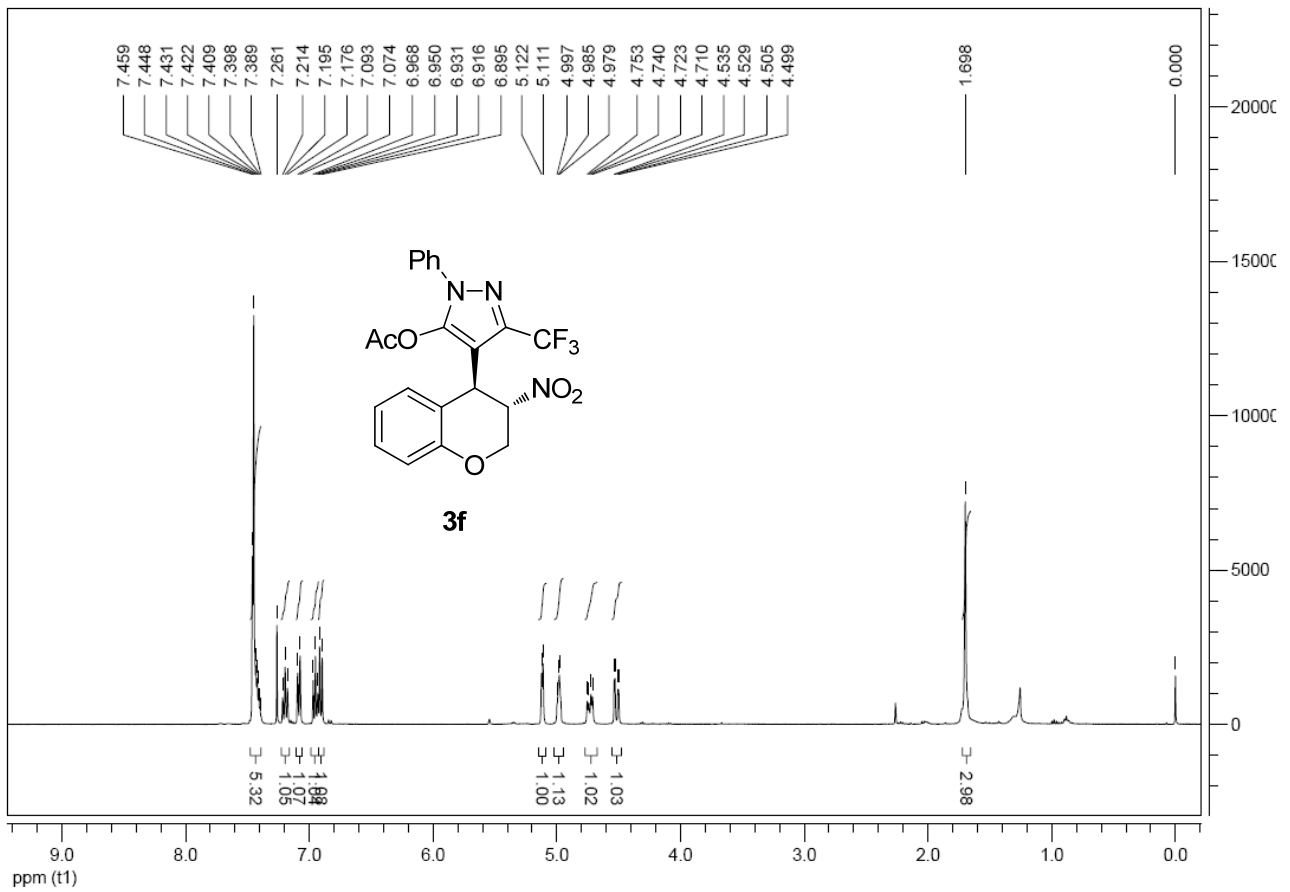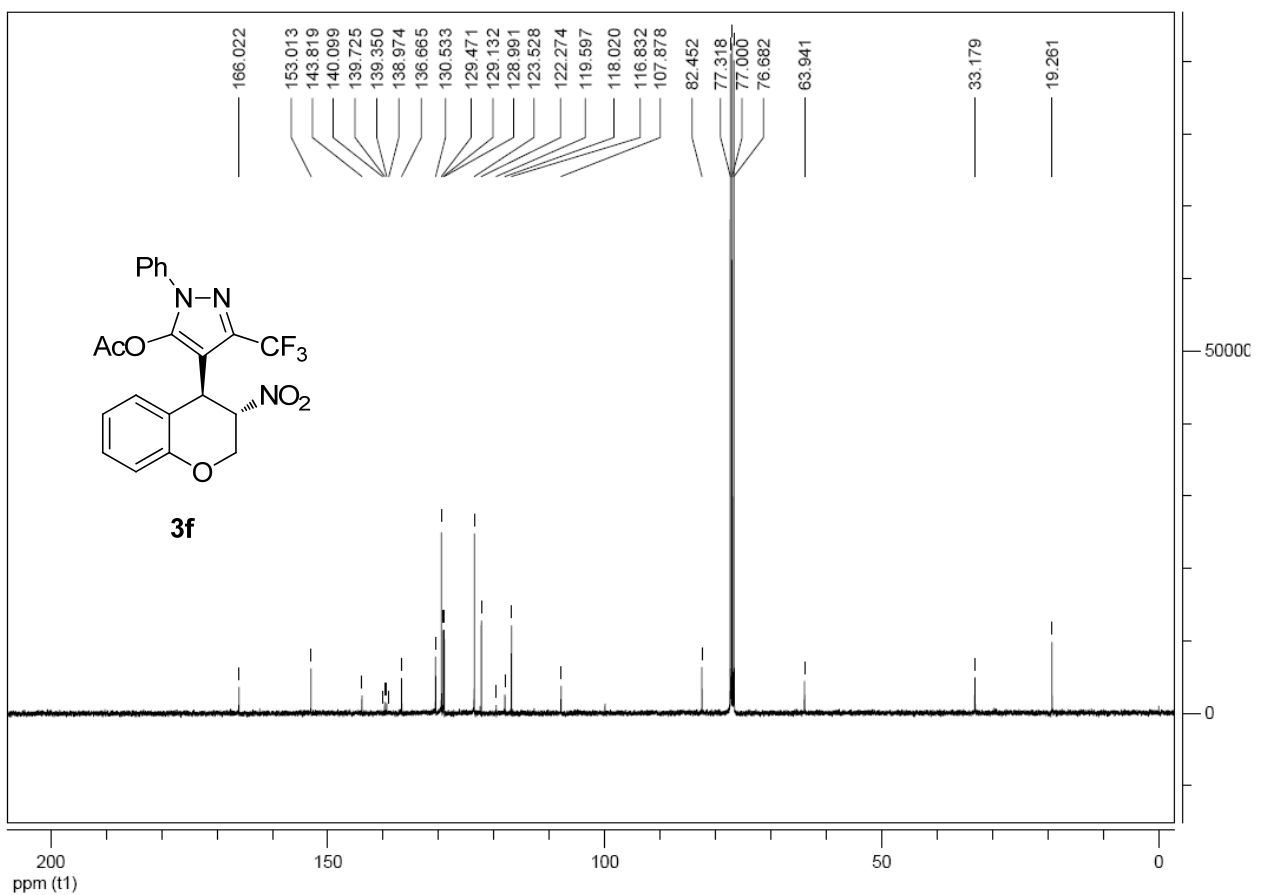

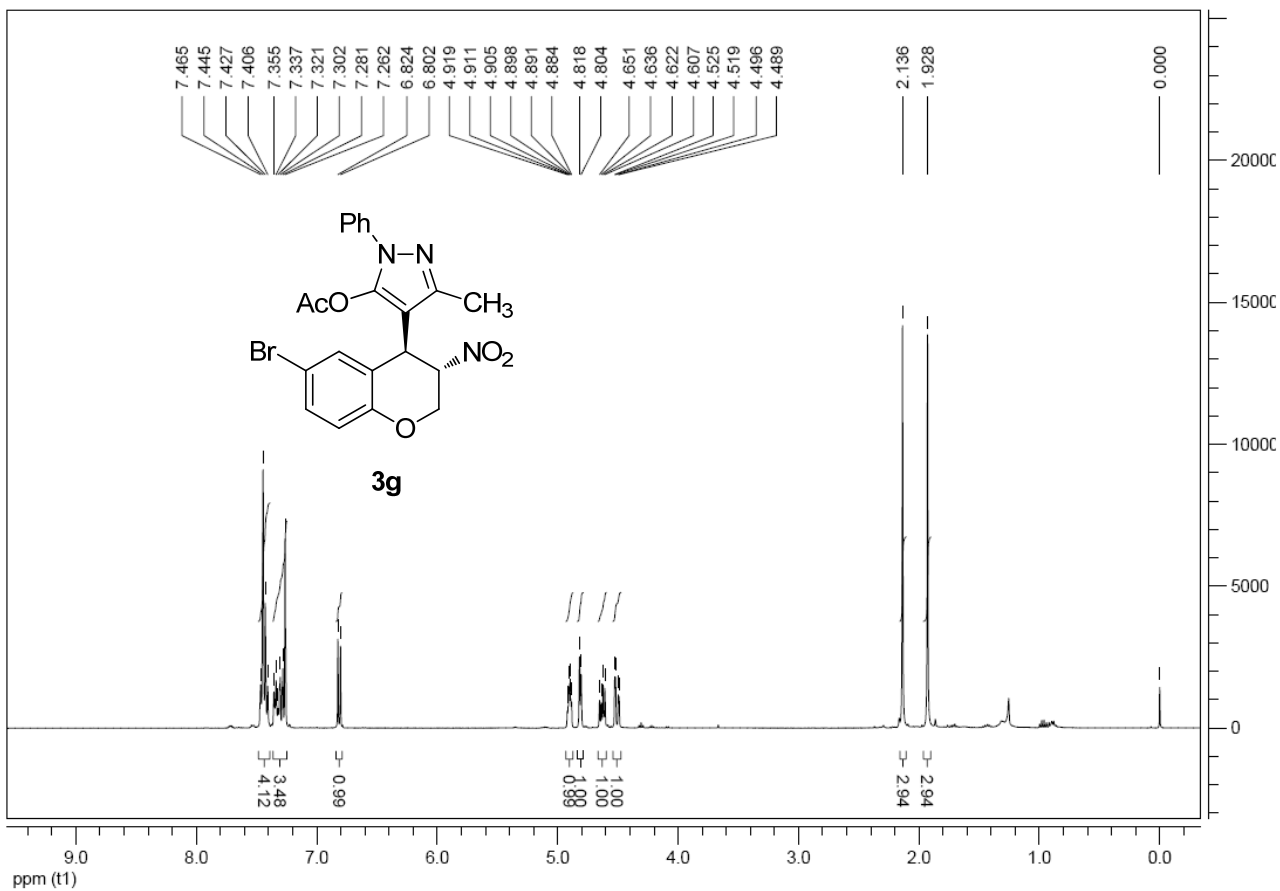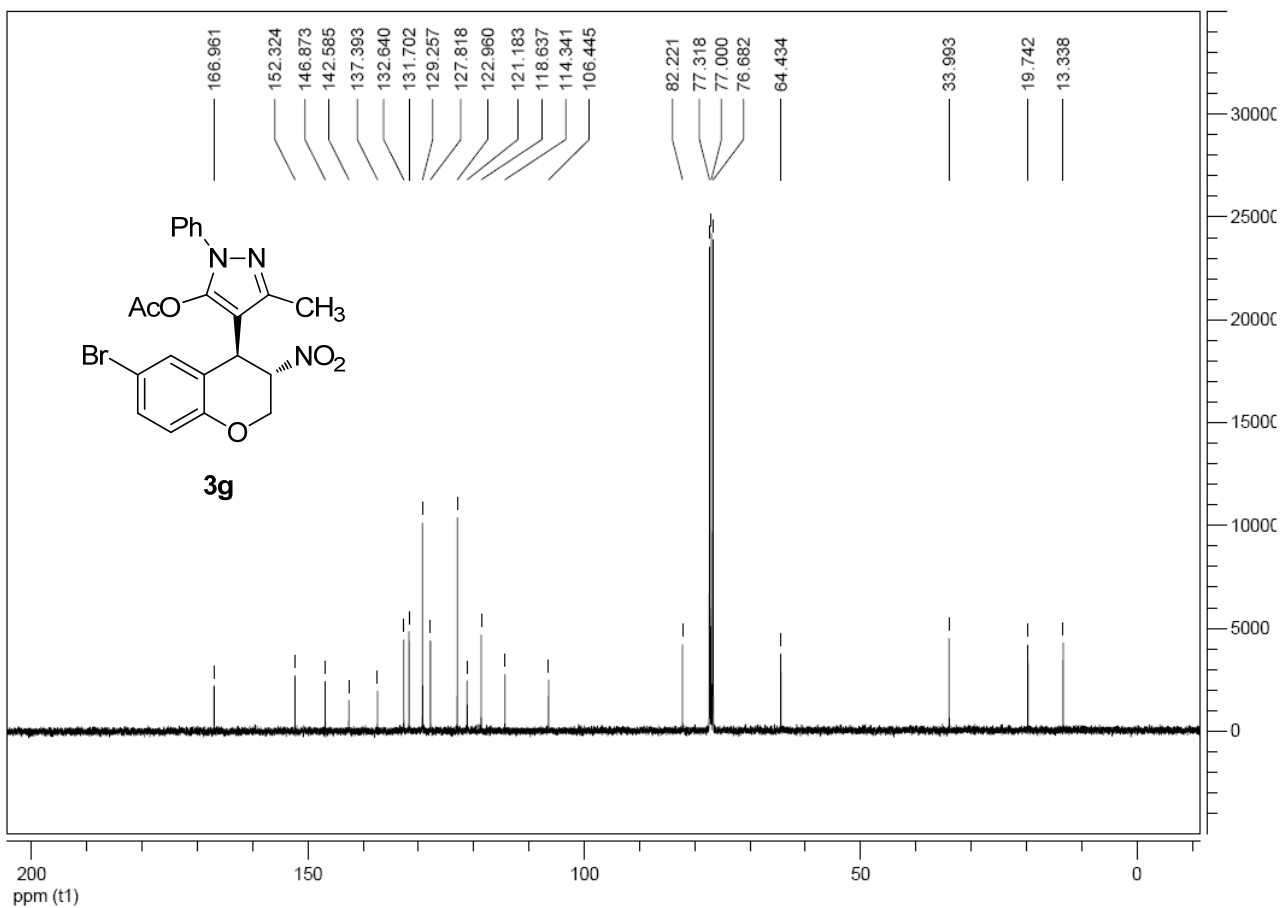



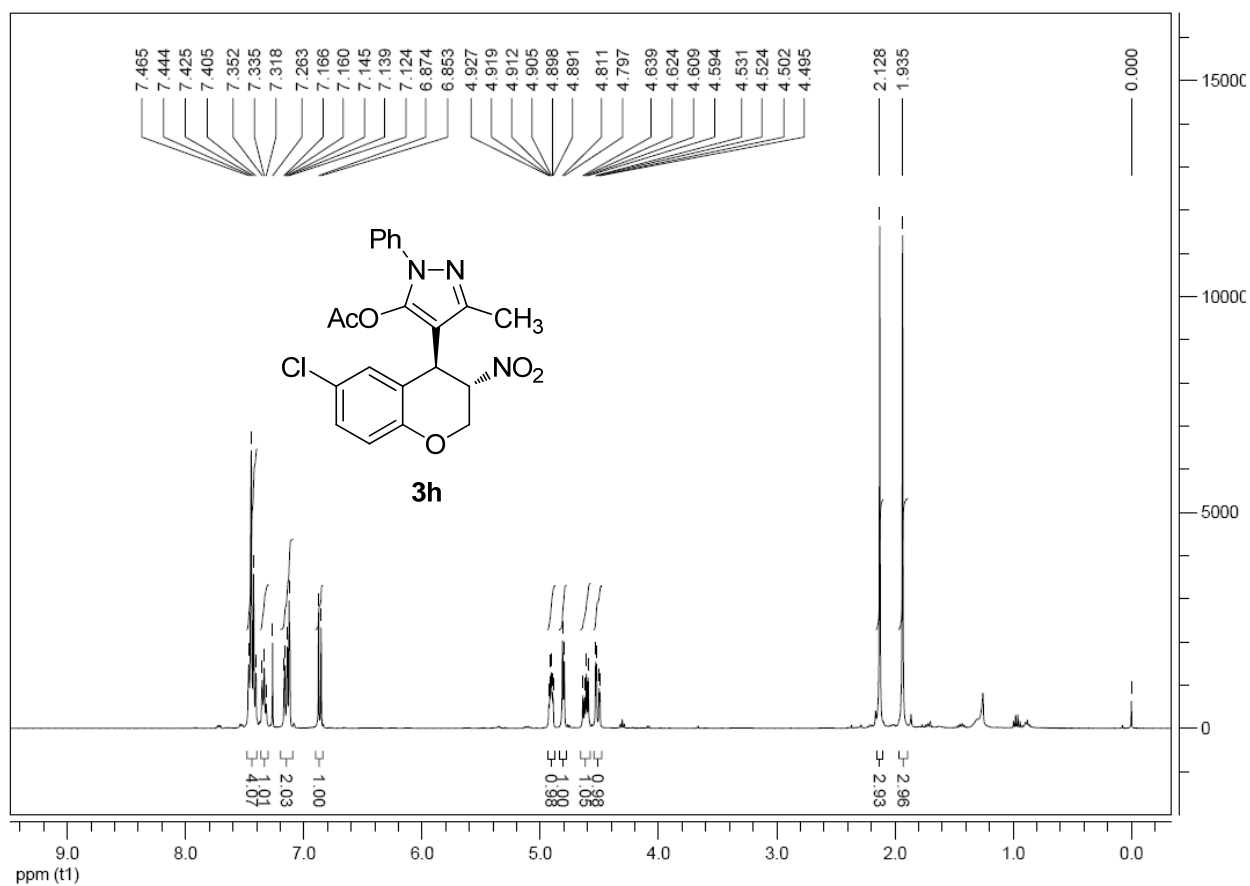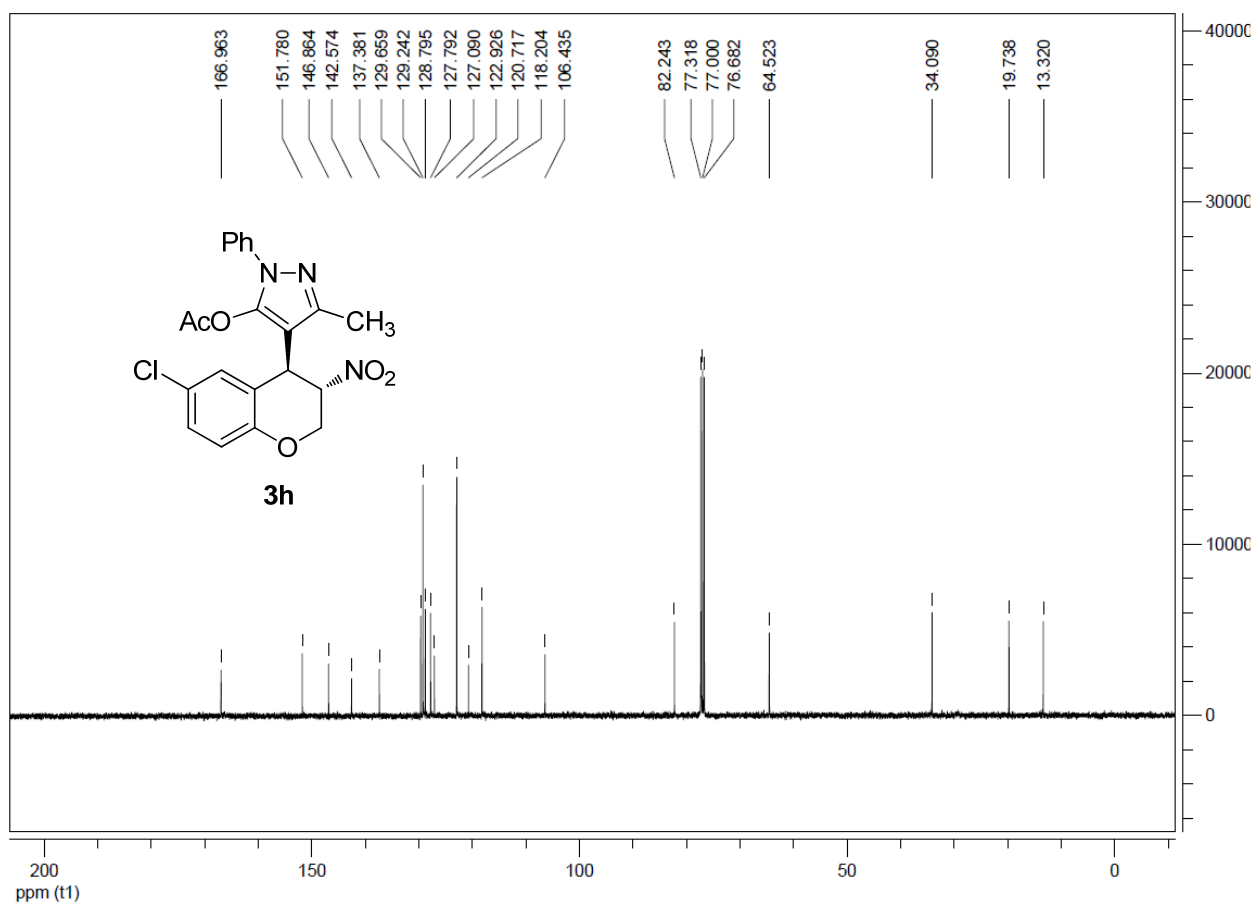

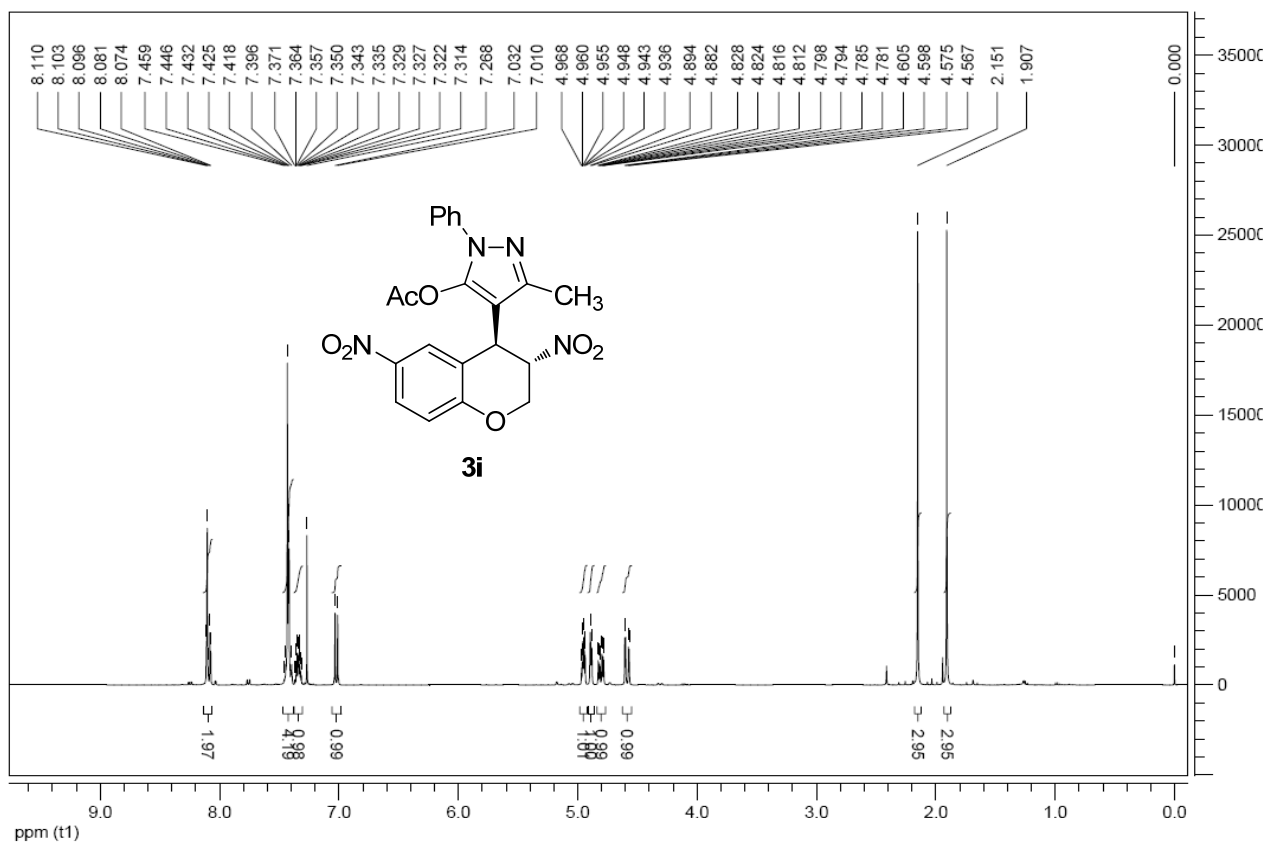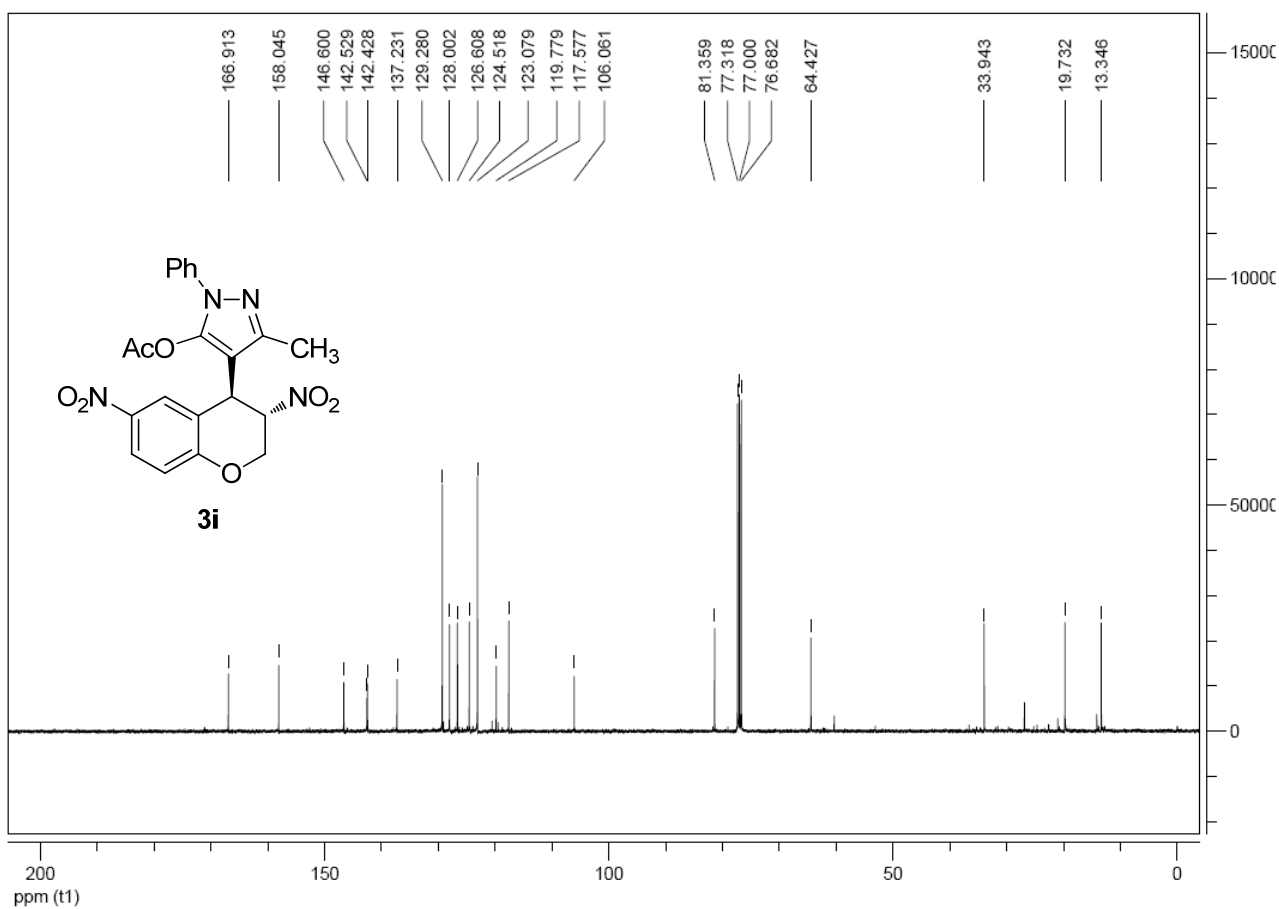

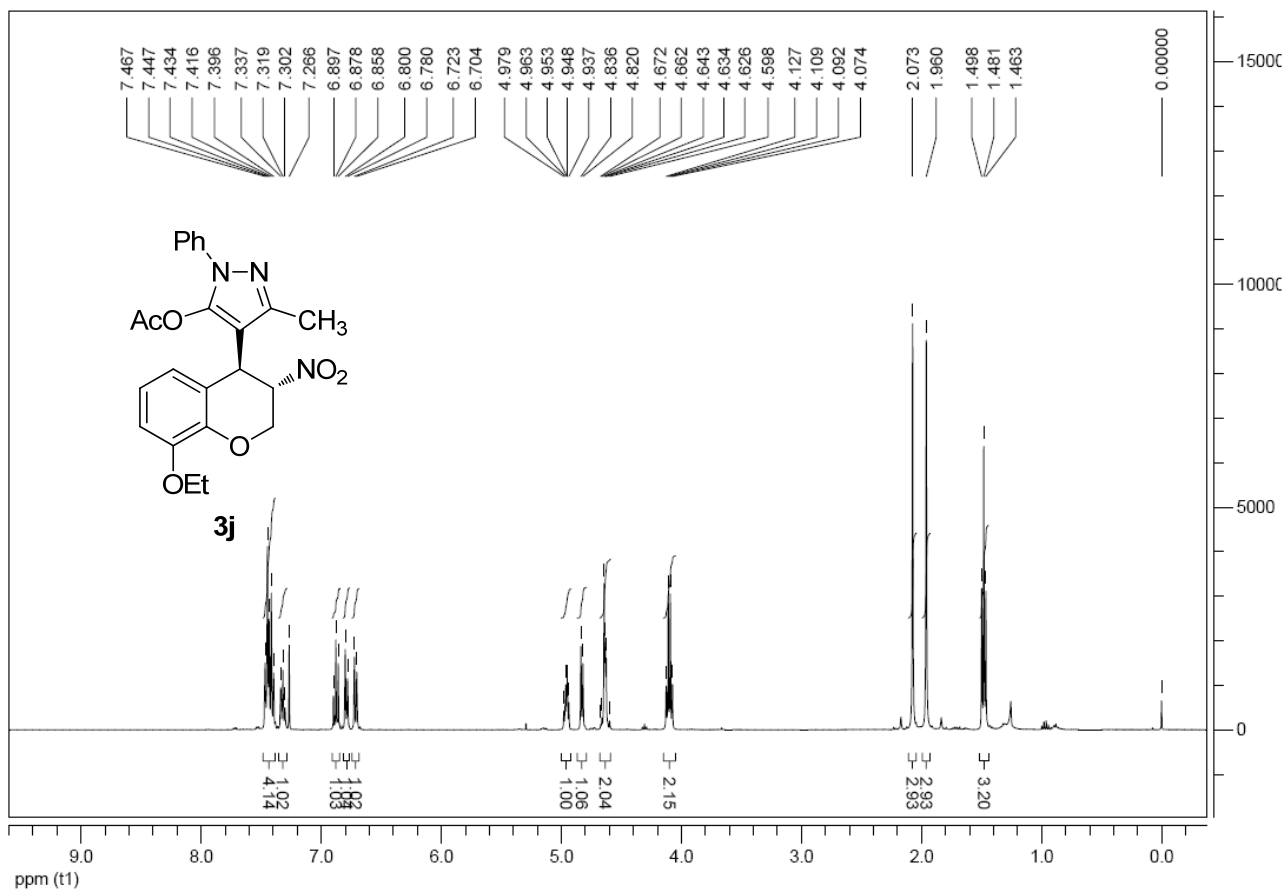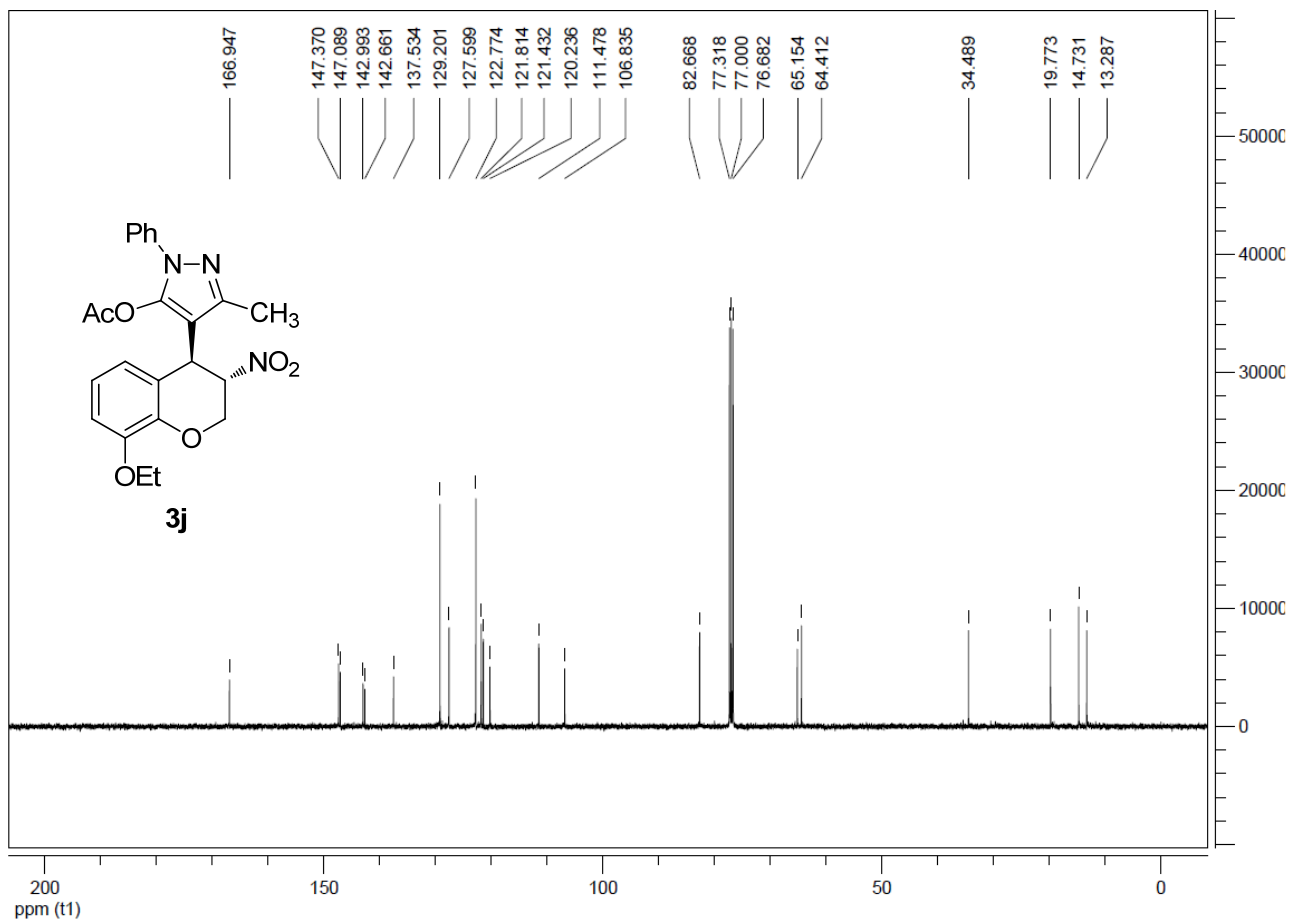

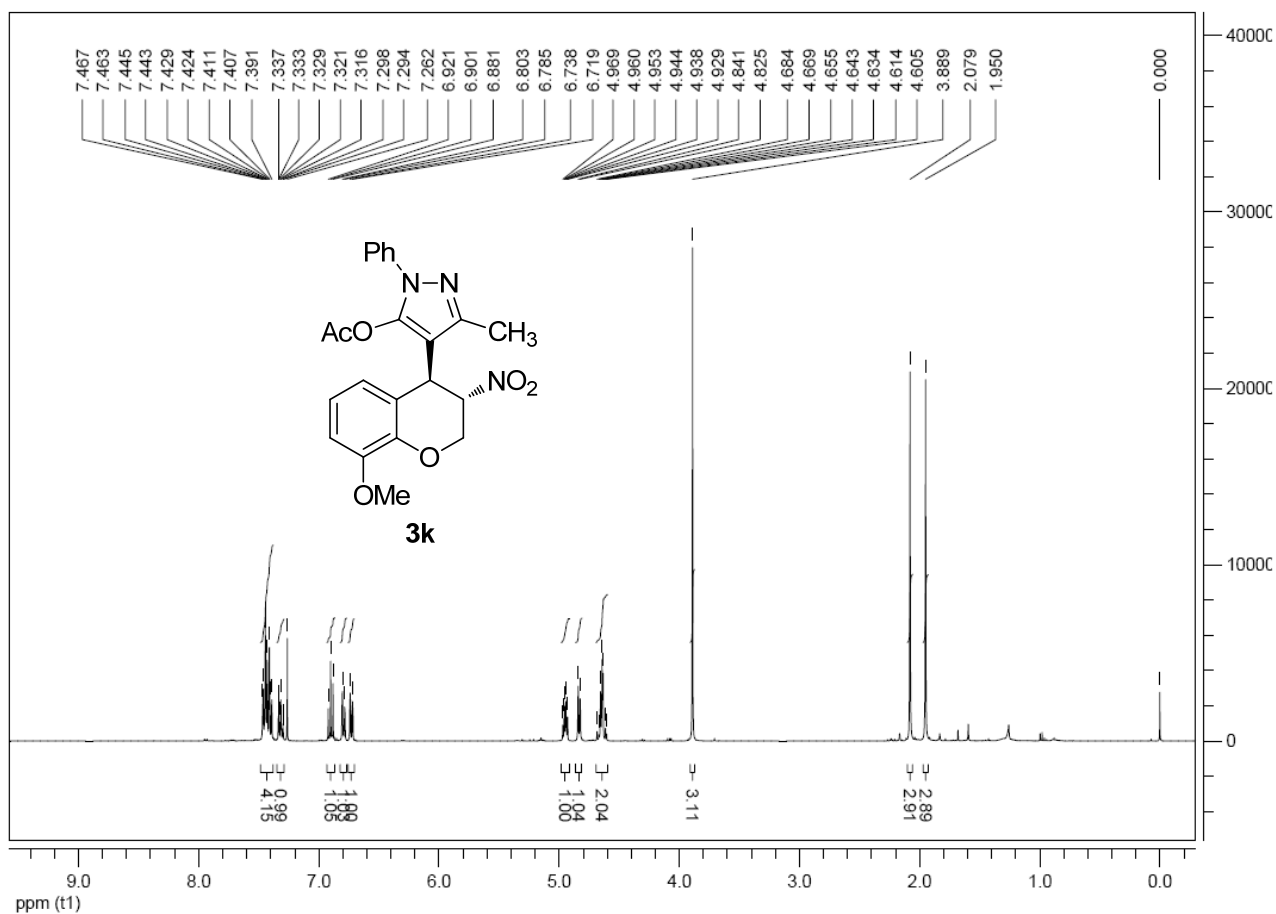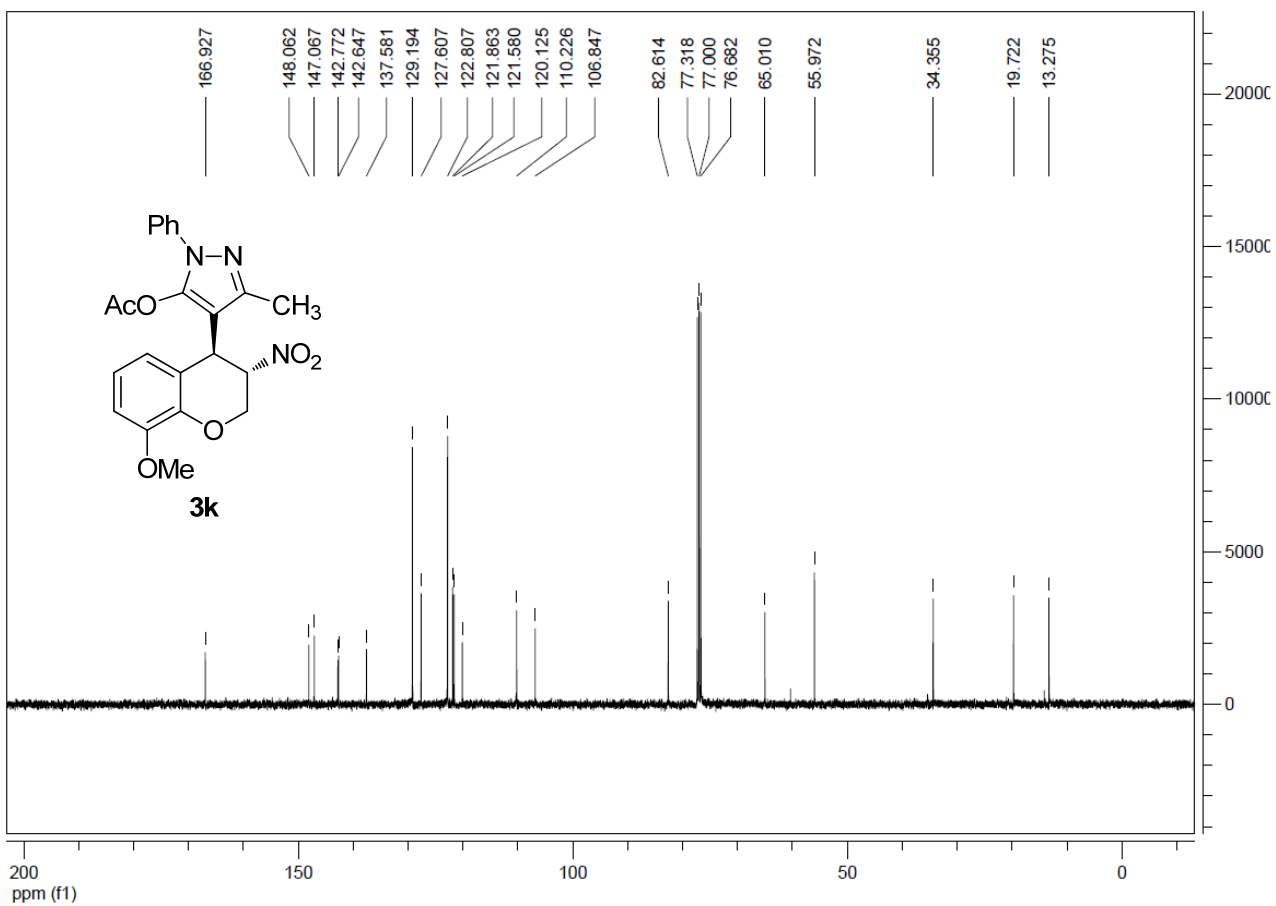

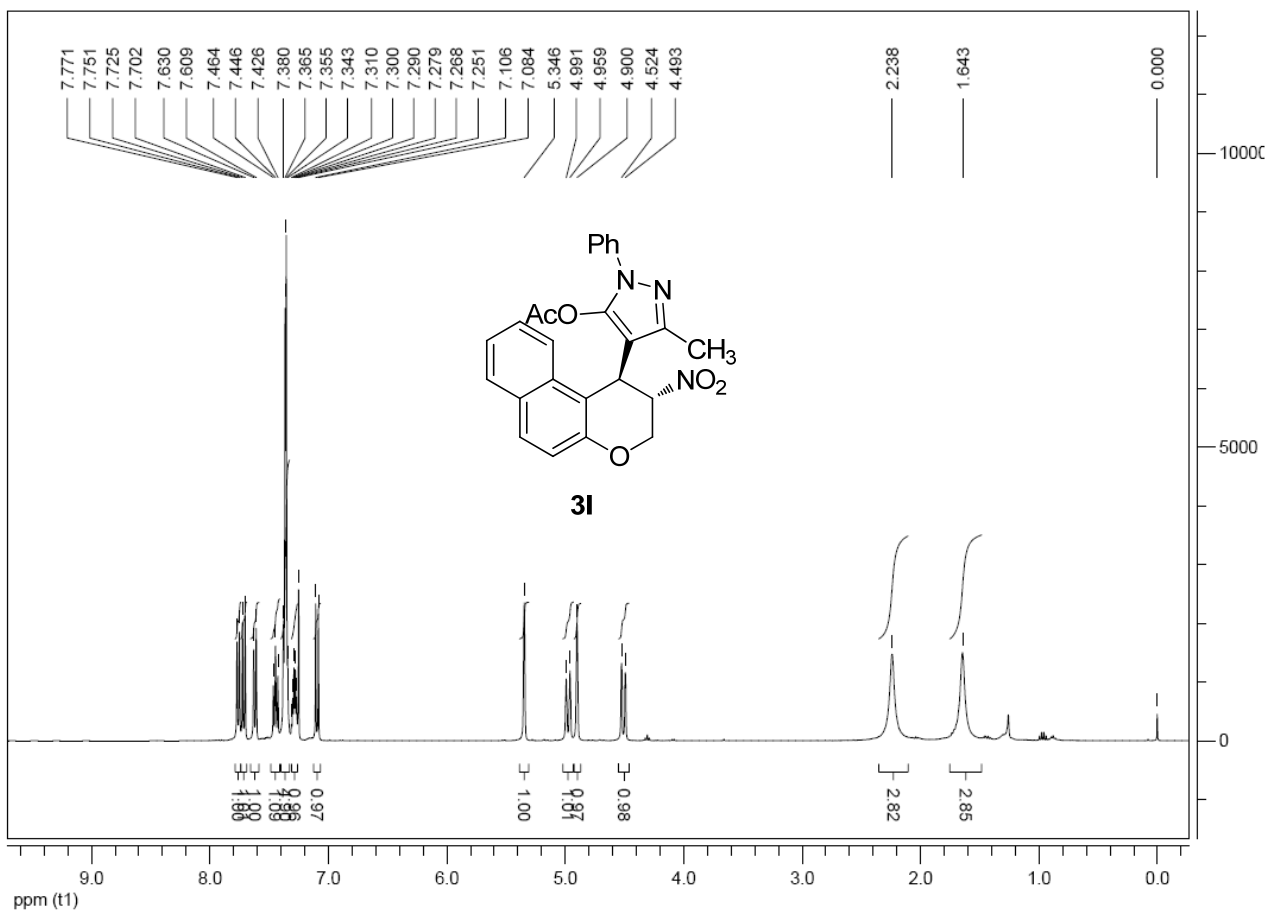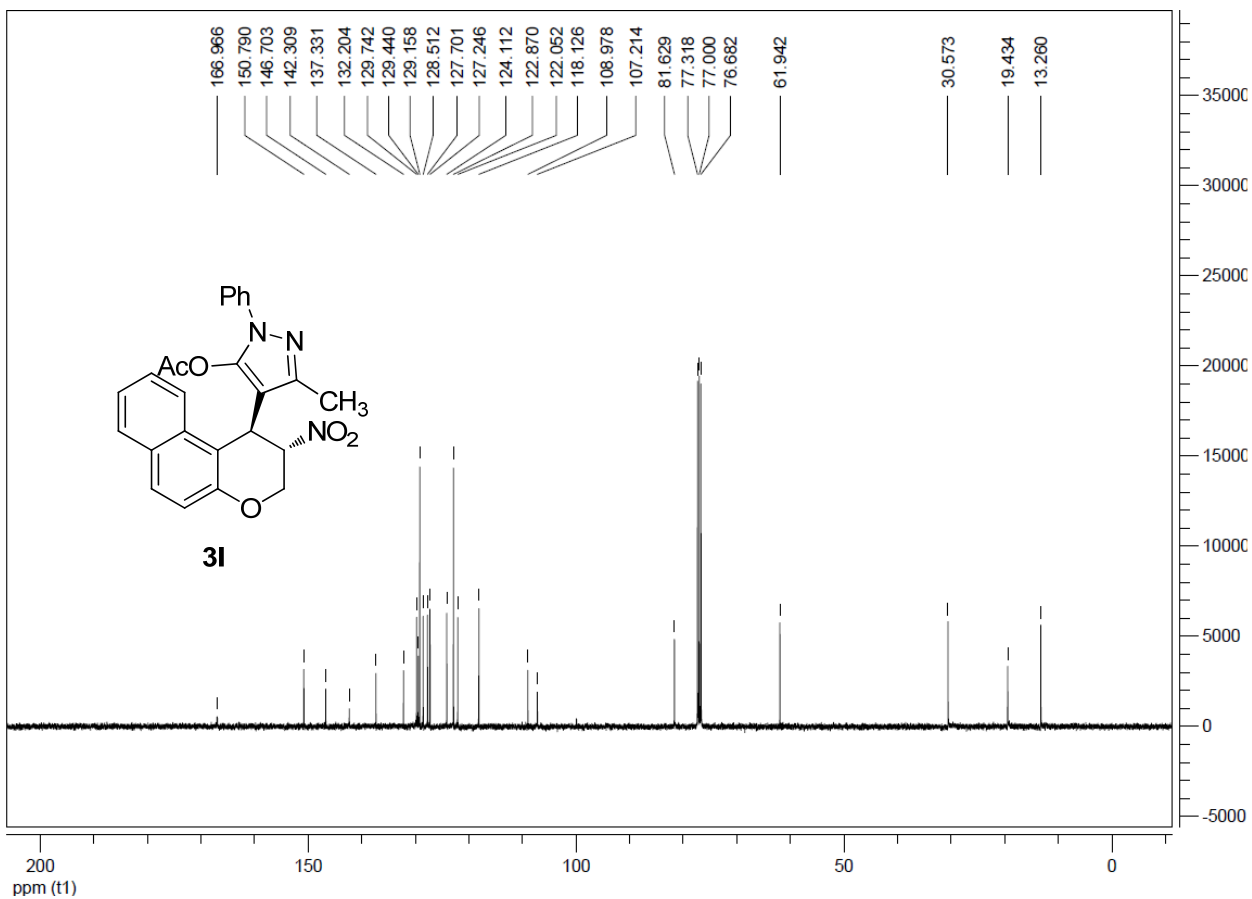

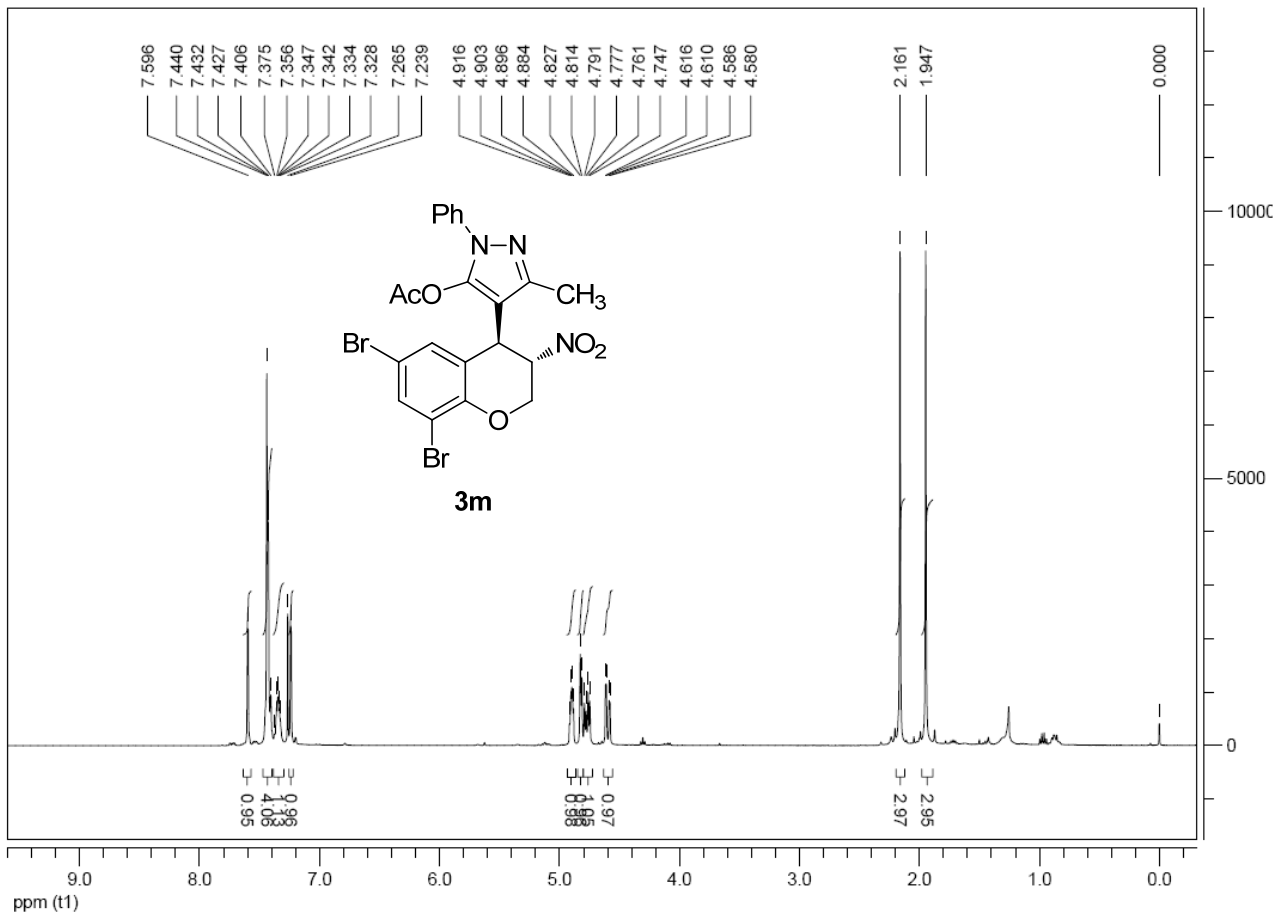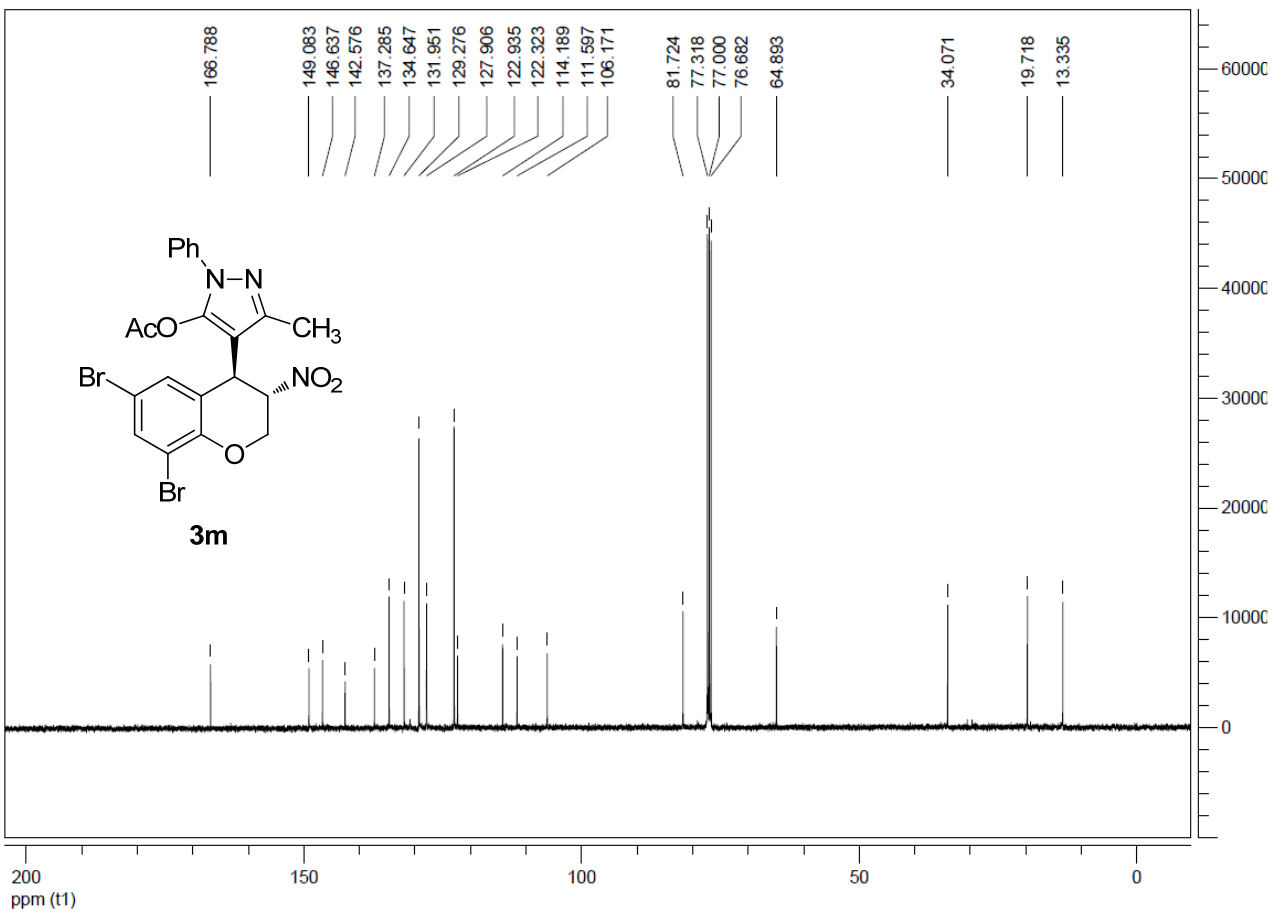

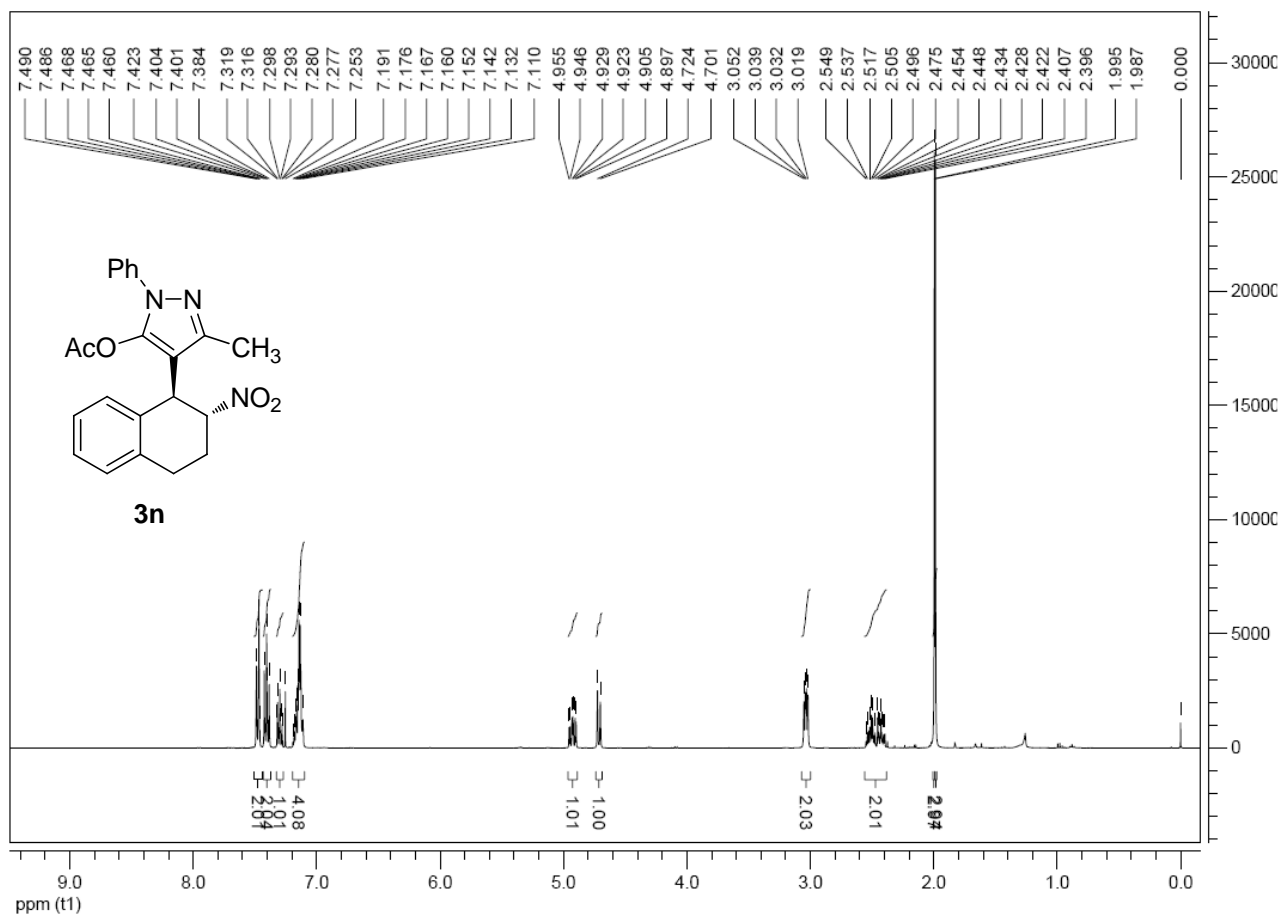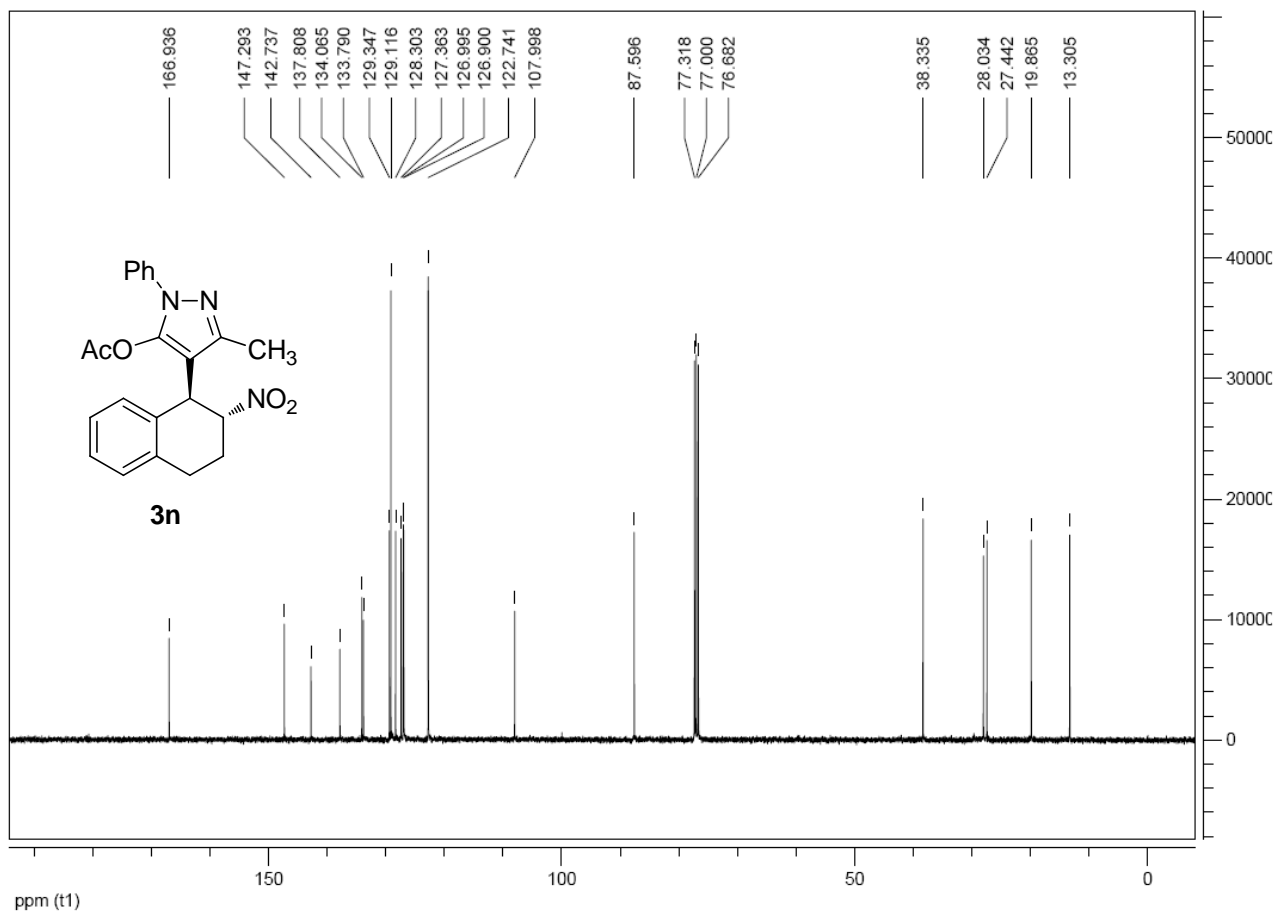

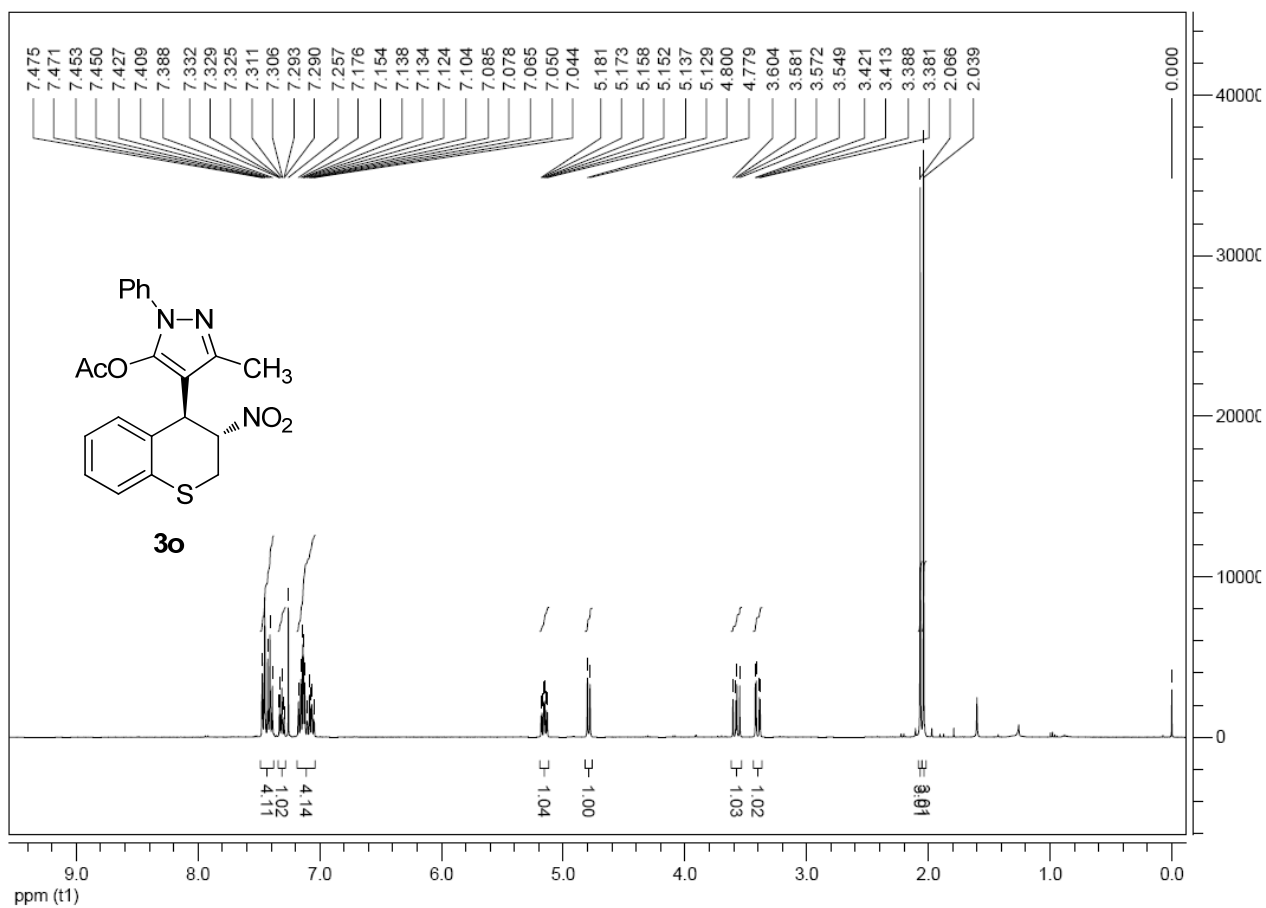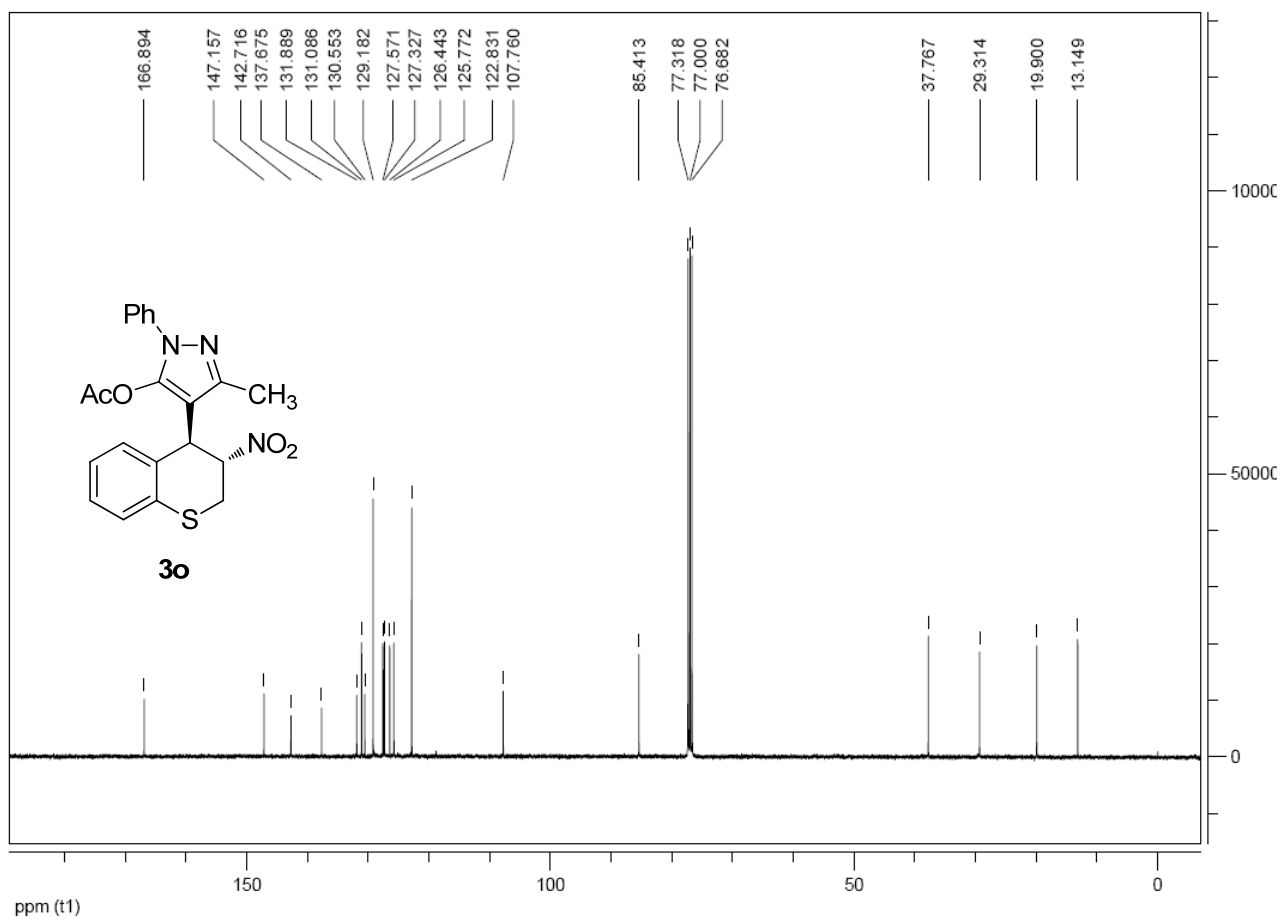



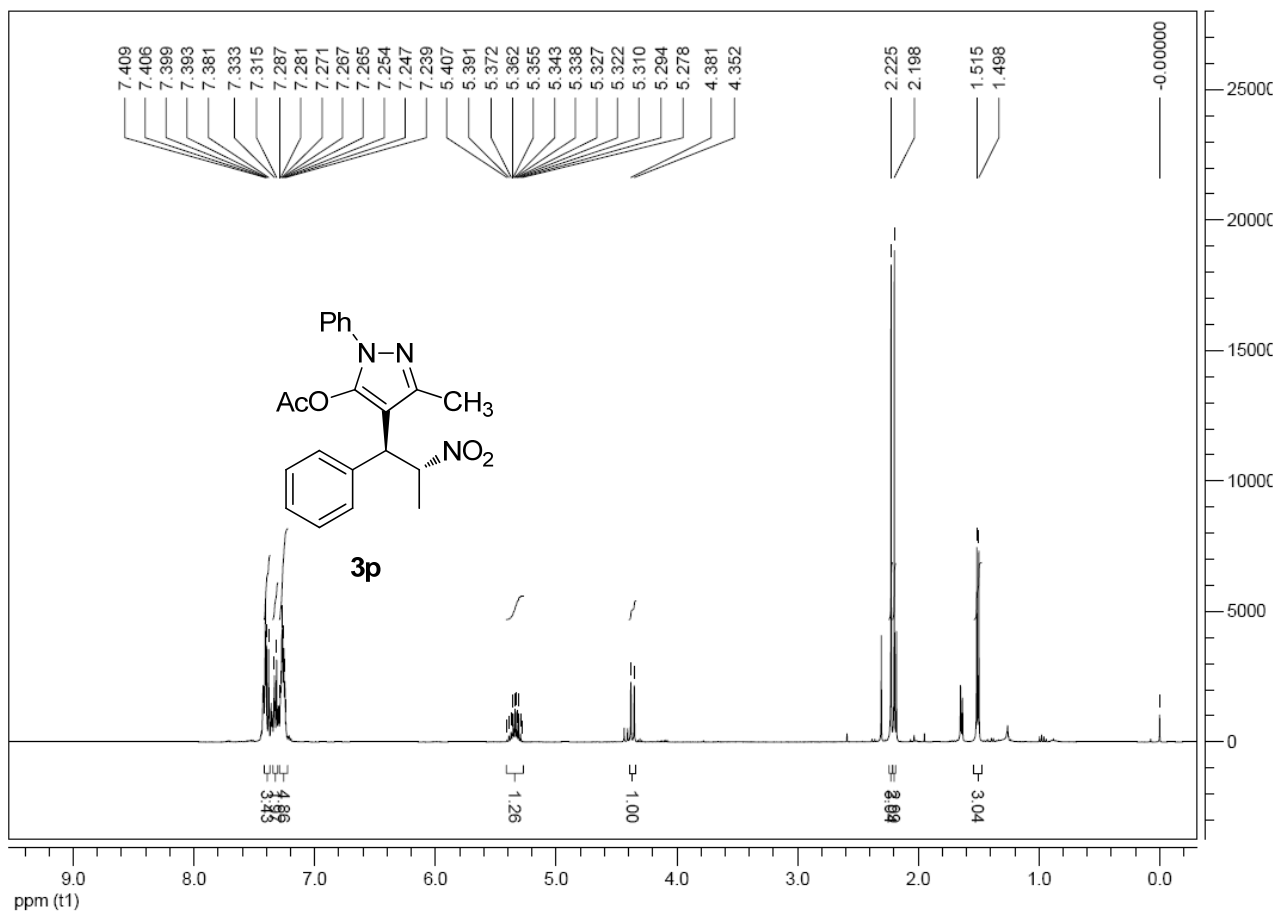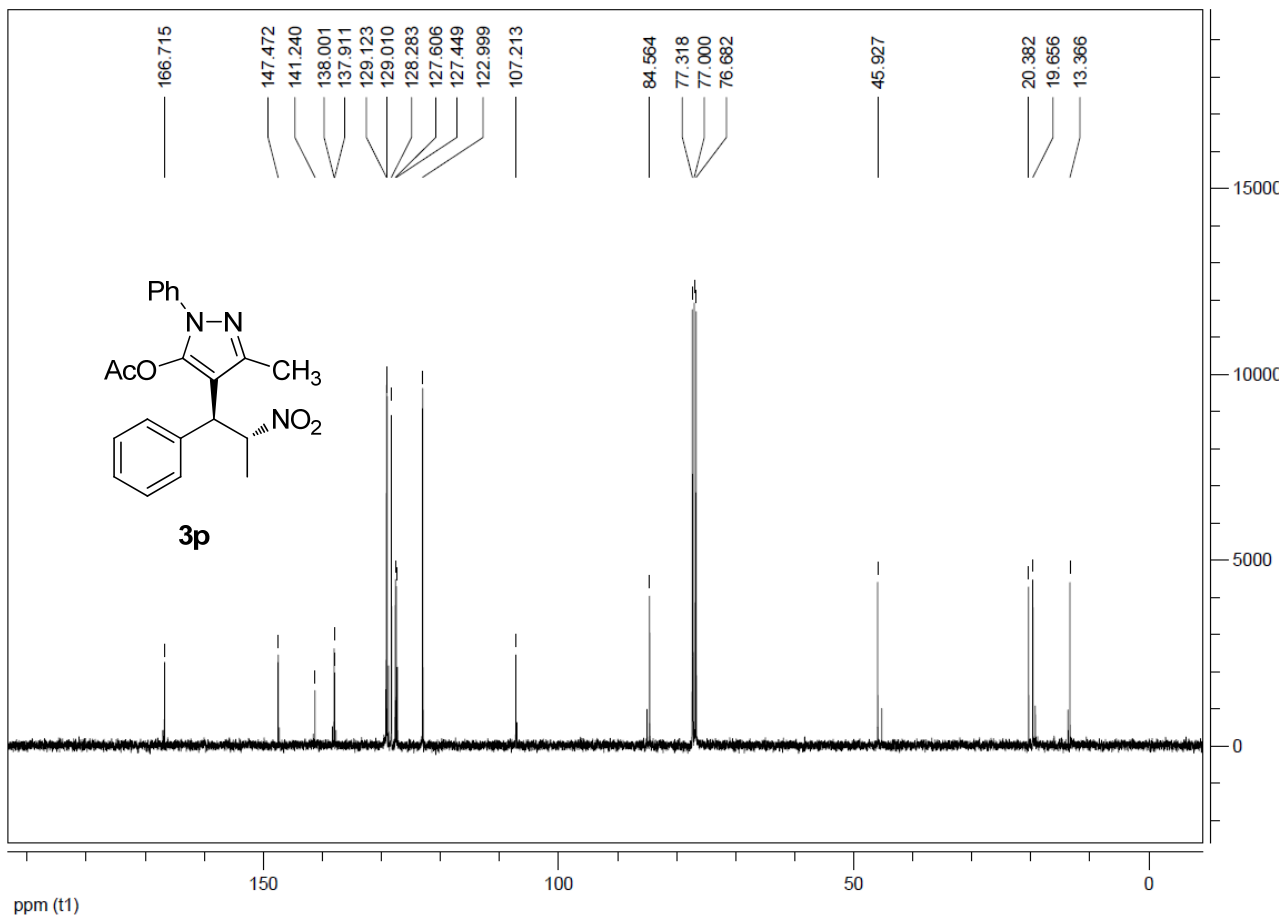

## Copies of HPLC chromatographs of new products

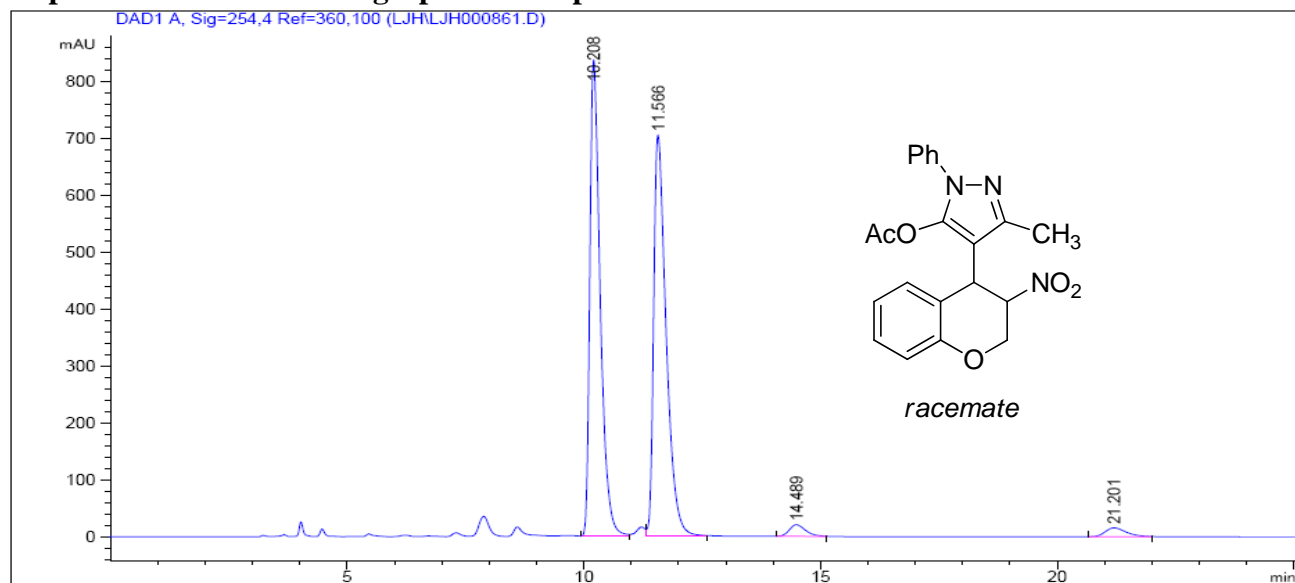

| Peak # | RetTime [min] | Type | Width [min] | Area [mAU*s] | Height [mAU] | Area %  |
|--------|---------------|------|-------------|--------------|--------------|---------|
| 1      | 10.208        | BV   | 0.2297      | 1.27380e4    | 836.39545    | 47.9487 |
| 2      | 11.566        | VB   | 0.2750      | 1.28584e4    | 704.38898    | 48.4018 |
| 3      | 14.489        | BB   | 0.3634      | 486.42966    | 20.45481     | 1.8310  |
| 4      | 21.201        | BB   | 0.4739      | 483.11777    | 15.57310     | 1.8186  |

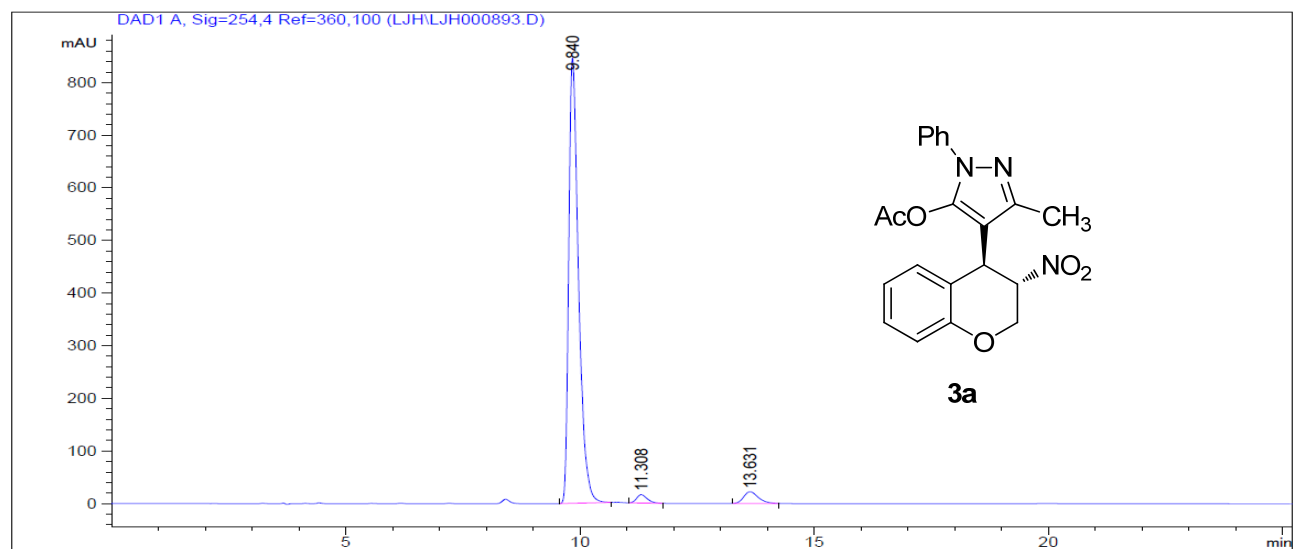

| Peak # | RetTime [min] | Type | Width [min] | Area [mAU*s] | Height [mAU] | Area %  |
|--------|---------------|------|-------------|--------------|--------------|---------|
| 1      | 9.840         | BB   | 0.2195      | 1.23044e4    | 846.85834    | 94.3480 |
| 2      | 11.308        | BB   | 0.2374      | 247.66667    | 15.92552     | 1.8991  |
| 3      | 13.631        | BB   | 0.3323      | 489.44339    | 22.45033     | 3.7530  |

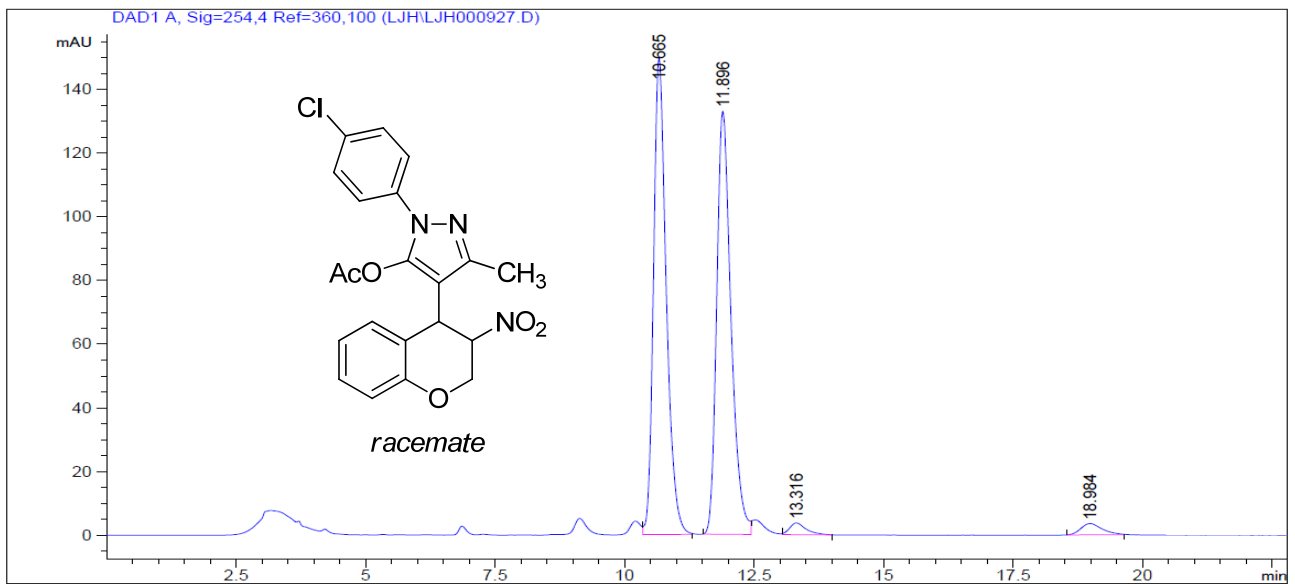

| Peak # | RetTime [min] | Type | Width [min] | Area [mAU*s] | Height [mAU] | Area %  |
|--------|---------------|------|-------------|--------------|--------------|---------|
| 1      | 10.665        | VB   | 0.2601      | 2566.19116   | 149.58864    | 48.3445 |
| 2      | 11.896        | BB   | 0.2885      | 2556.97900   | 132.89581    | 48.1709 |
| 3      | 13.316        | BB   | 0.3307      | 82.94588     | 3.71258      | 1.5626  |
| 4      | 18.984        | BB   | 0.3997      | 102.02163    | 3.54583      | 1.9220  |

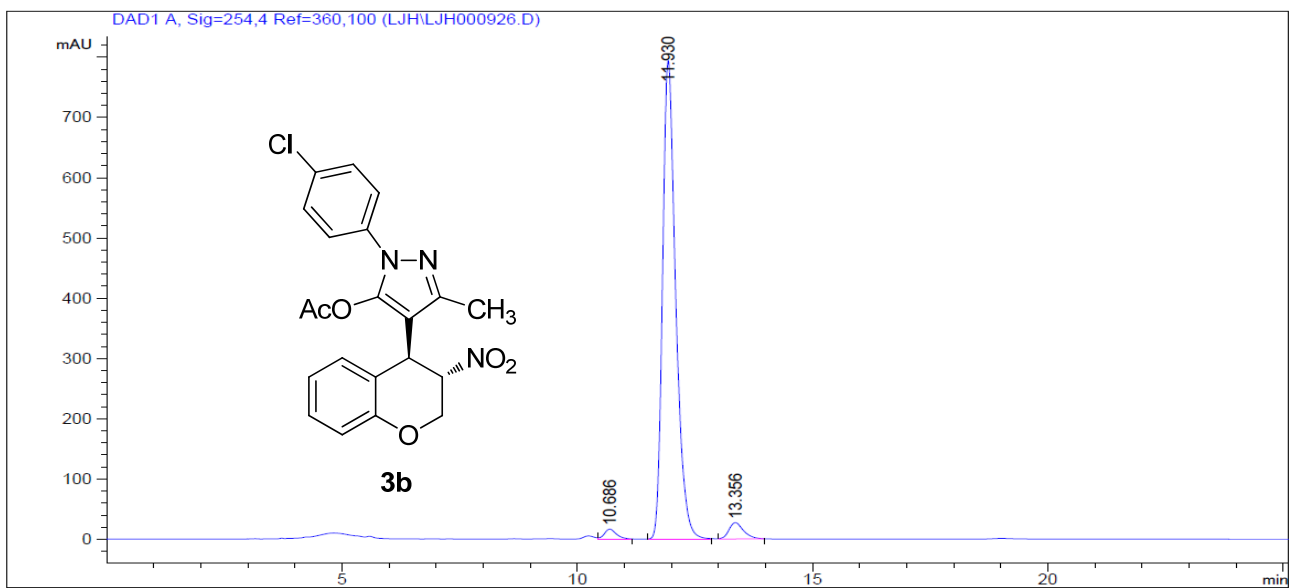

| Peak # | RetTime [min] | Type | Width [min] | Area [mAU*s] | Height [mAU] | Area %  |
|--------|---------------|------|-------------|--------------|--------------|---------|
| 1      | 10.686        | VB   | 0.2613      | 287.96140    | 16.52189     | 1.7671  |
| 2      | 11.930        | BB   | 0.2925      | 1.54235e4    | 794.50482    | 94.6450 |
| 3      | 13.356        | BB   | 0.3233      | 584.70062    | 27.14244     | 3.5880  |

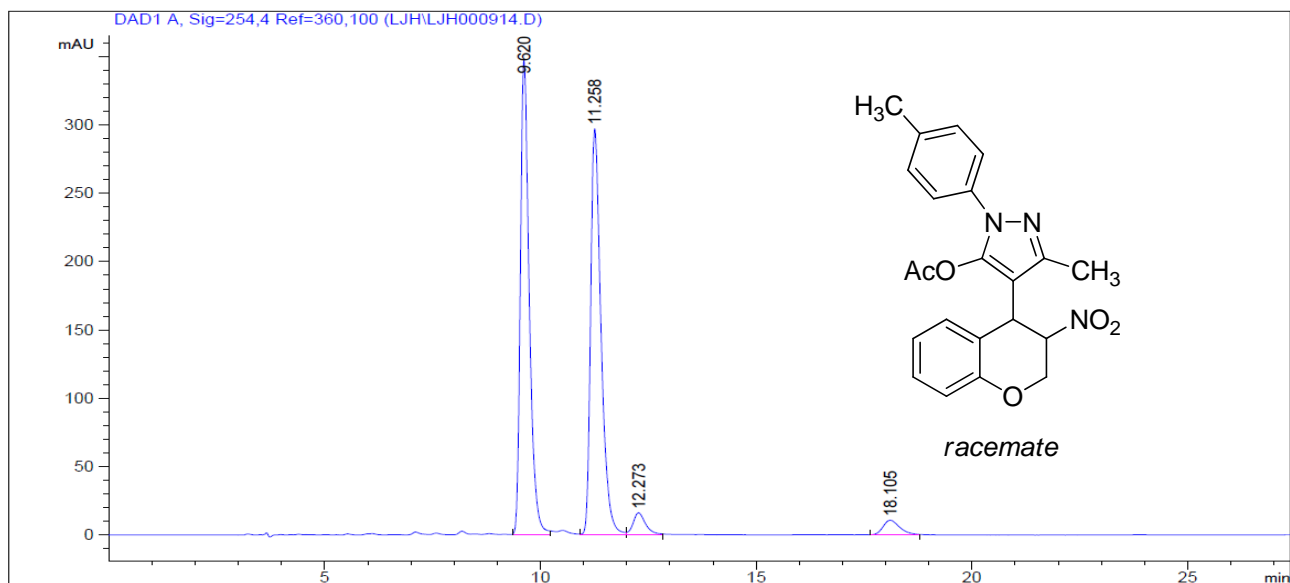

| Peak # | RetTime [min] | Type | Width [min] | Area [mAU*s] | Height [mAU] | Area %  |
|--------|---------------|------|-------------|--------------|--------------|---------|
| 1      | 9.620         | BB   | 0.2161      | 4942.12646   | 347.05499    | 47.1273 |
| 2      | 11.258        | VB   | 0.2524      | 4945.31885   | 296.82712    | 47.1577 |
| 3      | 12.273        | BB   | 0.2950      | 310.51251    | 15.81902     | 2.9610  |
| 4      | 18.105        | BB   | 0.4124      | 288.81088    | 10.71709     | 2.7541  |

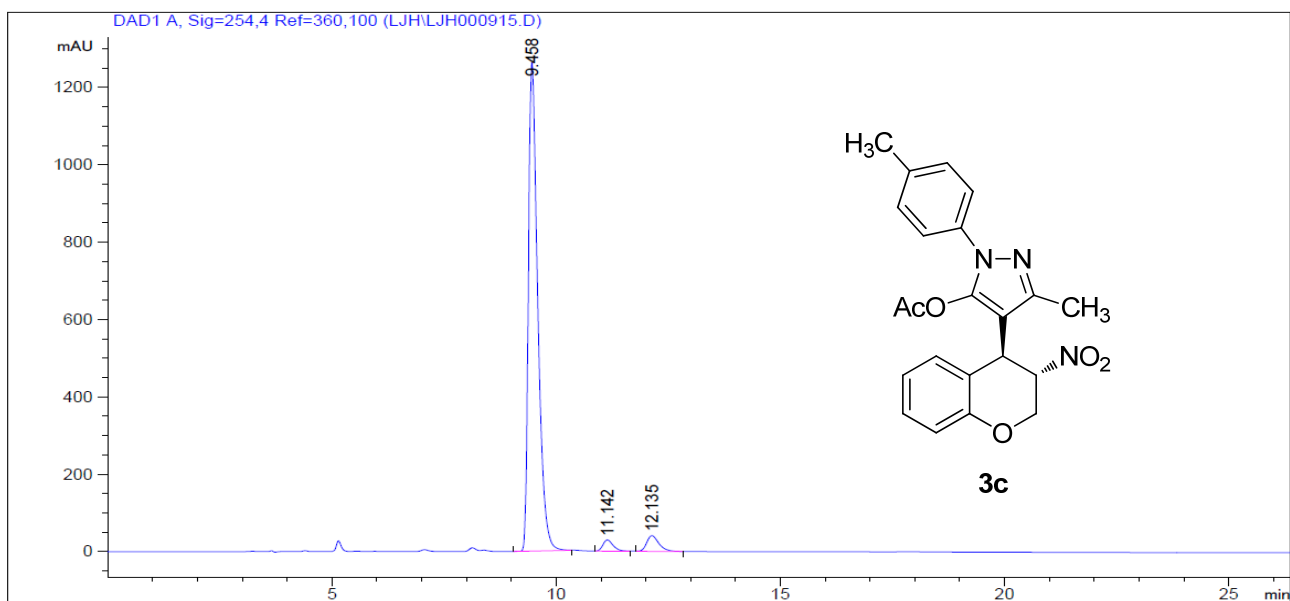

| Peak # | RetTime [min] | Type | Width [min] | Area [mAU*s] | Height [mAU] | Area %  |
|--------|---------------|------|-------------|--------------|--------------|---------|
| 1      | 9.458         | BB   | 0.2190      | 1.83106e4    | 1264.02185   | 93.7020 |
| 2      | 11.142        | BB   | 0.2420      | 463.79227    | 29.08827     | 2.3734  |
| 3      | 12.135        | BB   | 0.2851      | 766.92877    | 40.82925     | 3.9247  |

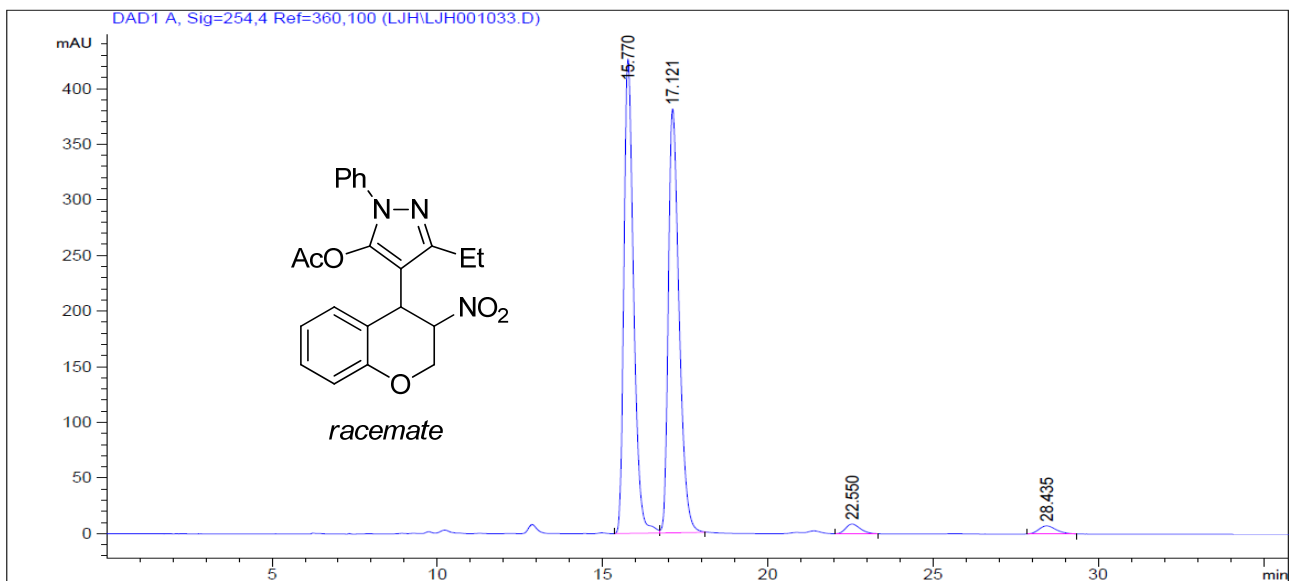

| Peak # | RetTime [min] | Type | Width [min] | Area [mAU*s] | Height [mAU] | Area %  |
|--------|---------------|------|-------------|--------------|--------------|---------|
| 1      | 15.770        | BV   | 0.3127      | 8729.25098   | 426.56403    | 48.7150 |
| 2      | 17.121        | VB   | 0.3469      | 8652.43359   | 381.04126    | 48.2863 |
| 3      | 22.550        | BB   | 0.4685      | 269.07297    | 8.75696      | 1.5016  |
| 4      | 28.435        | BB   | 0.5336      | 268.26013    | 7.31950      | 1.4971  |

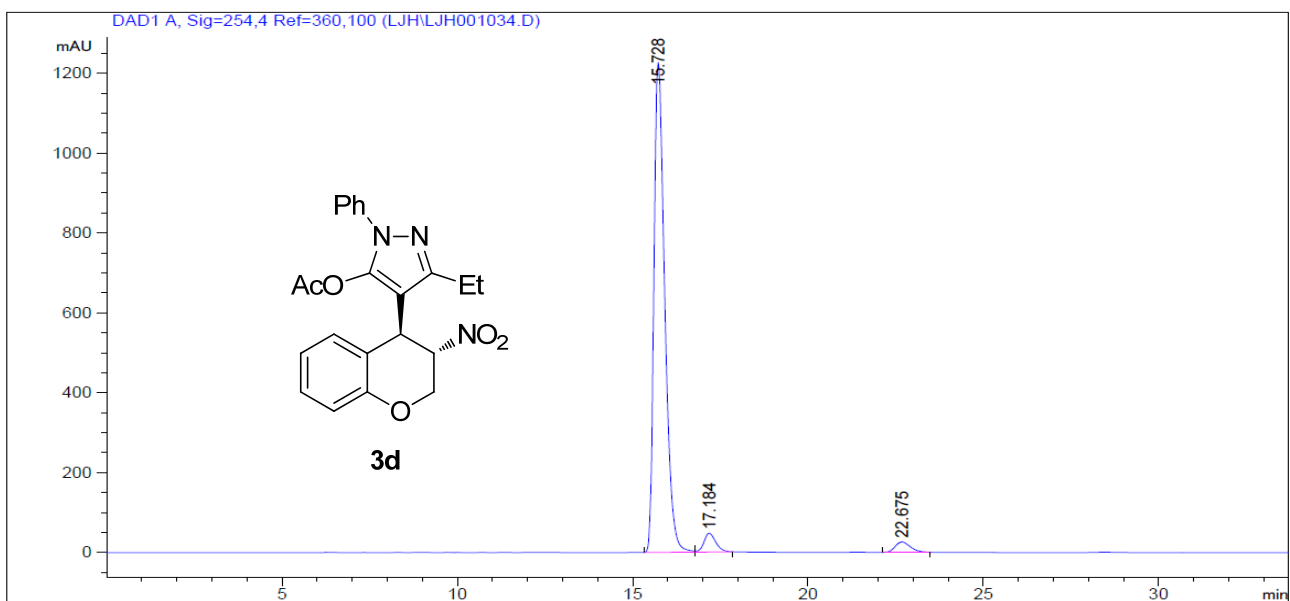

| Peak # | RetTime [min] | Type | Width [min] | Area [mAU*s] | Height [mAU] | Area %  |
|--------|---------------|------|-------------|--------------|--------------|---------|
| 1      | 15.728        | BB   | 0.3278      | 2.62649e4    | 1226.55090   | 93.2765 |
| 2      | 17.184        | BB   | 0.3567      | 1108.43677   | 47.41898     | 3.9365  |
| 3      | 22.675        | BB   | 0.4615      | 784.78302    | 26.04961     | 2.7871  |

DAD1 A, Sig=254,4 Ref=360,100 (LJHLJH000918.D)

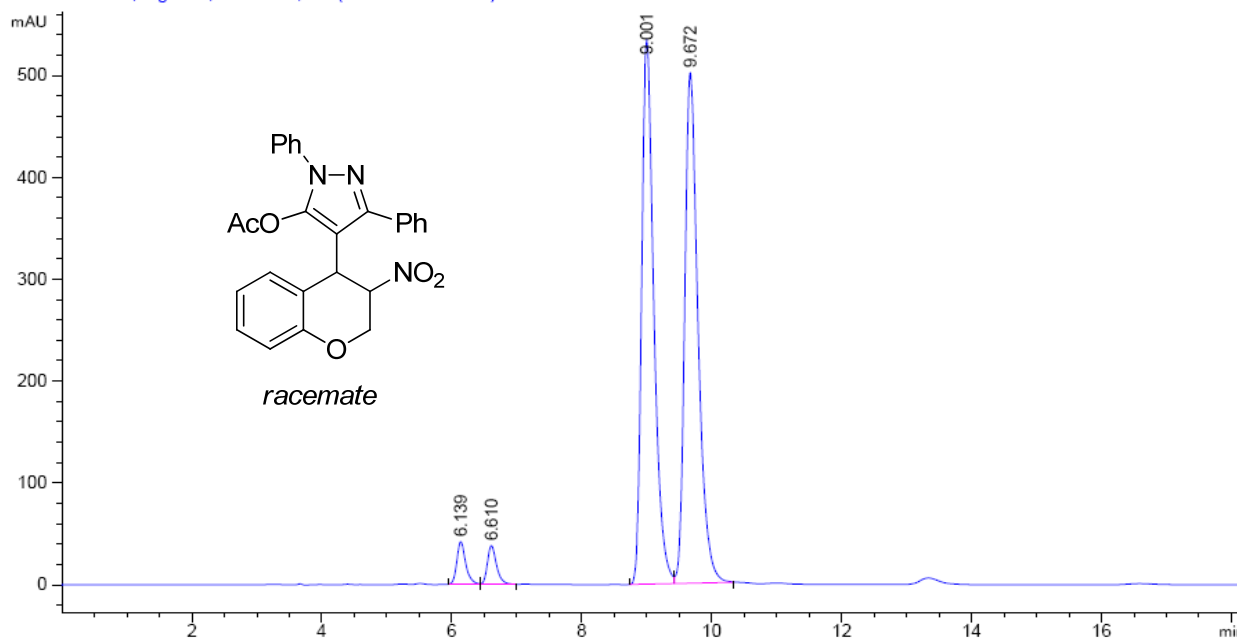

| Peak # | RetTime [min] | Type | Width [min] | Area [mAU*s] | Height [mAU] | Area %  |
|--------|---------------|------|-------------|--------------|--------------|---------|
| 1      | 6.139         | BV   | 0.1441      | 405.05539    | 42.16006     | 2.7253  |
| 2      | 6.610         | VB   | 0.1496      | 378.69577    | 38.21795     | 2.5479  |
| 3      | 9.001         | BV   | 0.1978      | 6957.47852   | 534.74292    | 46.8109 |
| 4      | 9.672         | VB   | 0.2137      | 7121.72656   | 501.47775    | 47.9159 |

DAD1 A, Sig=254,4 Ref=360,100 (LJHLJH000919.D)

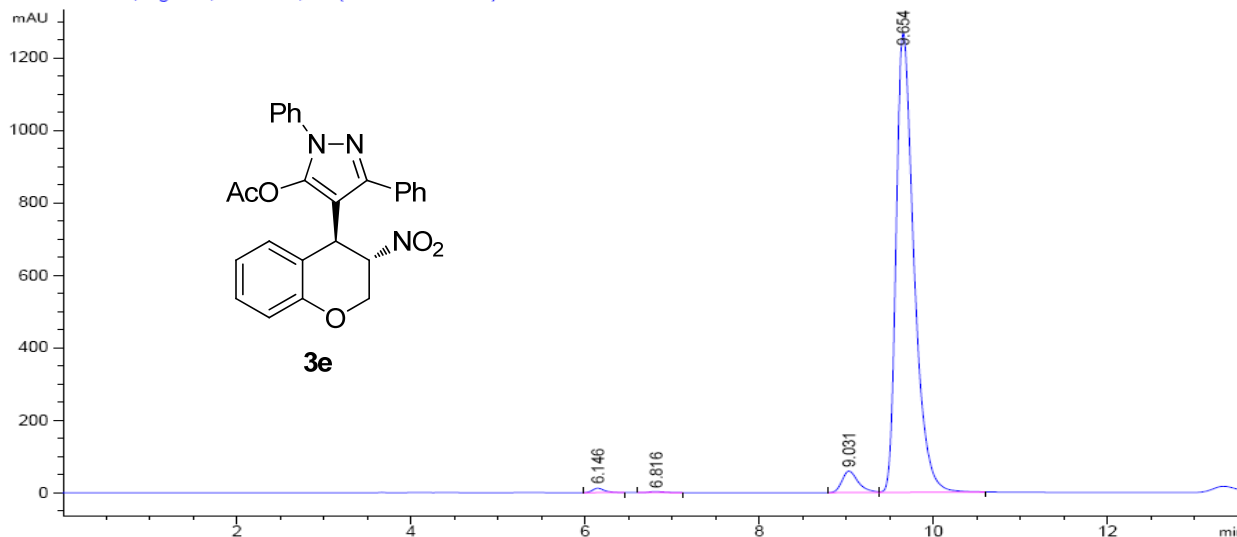

| Peak # | RetTime [min] | Type | Width [min] | Area [mAU*s] | Height [mAU] | Area %  |
|--------|---------------|------|-------------|--------------|--------------|---------|
| 1      | 6.146         | BB   | 0.1424      | 117.27174    | 12.39405     | 0.6187  |
| 2      | 6.816         | BB   | 0.1890      | 34.06942     | 2.78033      | 0.1797  |
| 3      | 9.031         | BV   | 0.1956      | 769.97101    | 59.26824     | 4.0619  |
| 4      | 9.654         | VB   | 0.2139      | 1.80345e4    | 1268.34143   | 95.1397 |

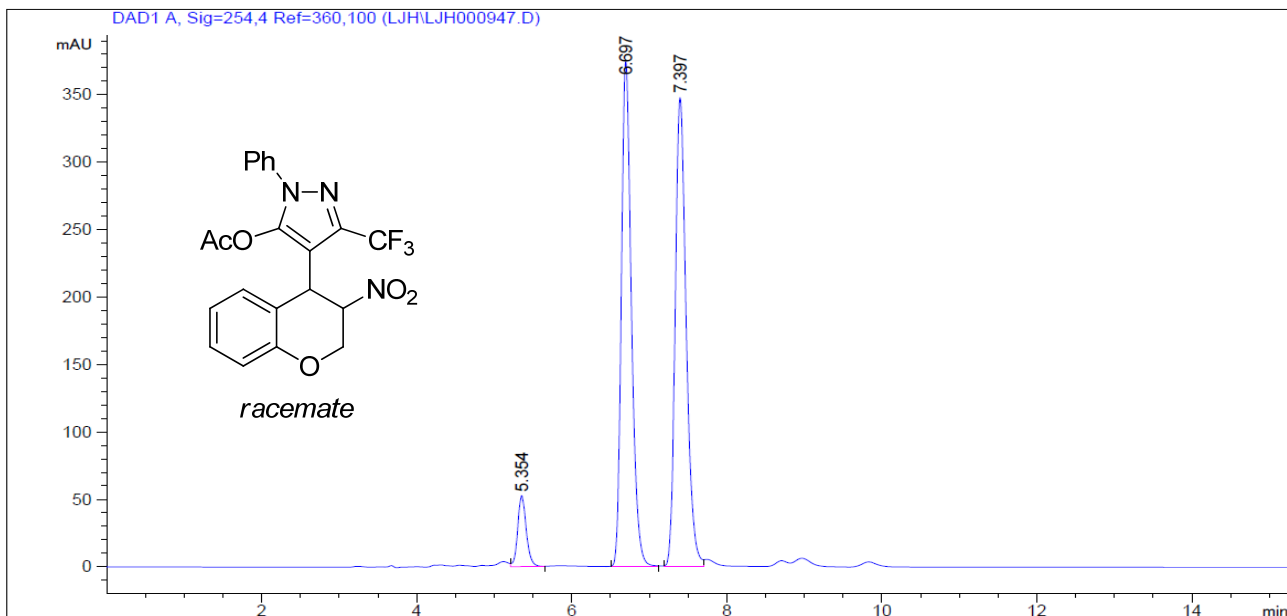

| Peak # | RetTime [min] | Type | Width [min] | Area [mAU*s] | Height [mAU] | Area %  |
|--------|---------------|------|-------------|--------------|--------------|---------|
| 1      | 5.354         | VB   | 0.1175      | 403.52185    | 52.61337     | 5.6211  |
| 2      | 6.697         | BB   | 0.1386      | 3359.99365   | 374.74170    | 46.8049 |
| 3      | 7.397         | BV   | 0.1486      | 3415.20142   | 347.62582    | 47.5740 |

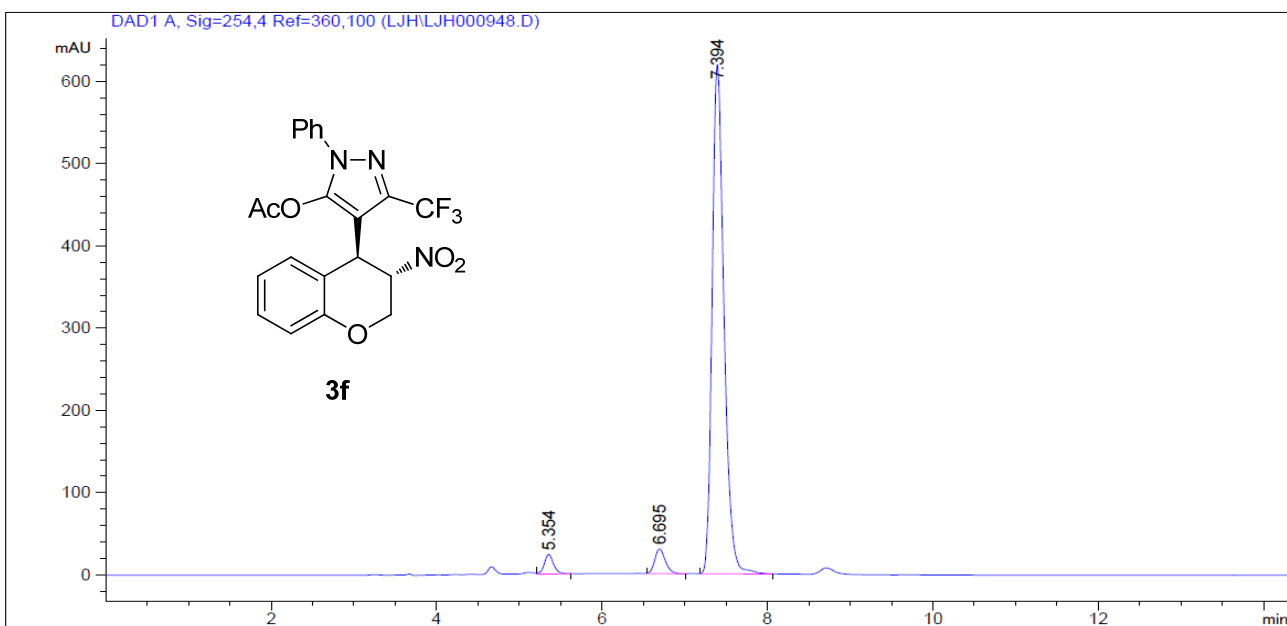

| Peak # | RetTime [min] | Type | Width [min] | Area [mAU*s] | Height [mAU] | Area %  |
|--------|---------------|------|-------------|--------------|--------------|---------|
| 1      | 5.354         | VB   | 0.1203      | 187.10950    | 23.65139     | 2.8331  |
| 2      | 6.695         | BB   | 0.1355      | 266.03564    | 29.98787     | 4.0282  |
| 3      | 7.394         | BB   | 0.1518      | 6151.19824   | 619.55896    | 93.1387 |

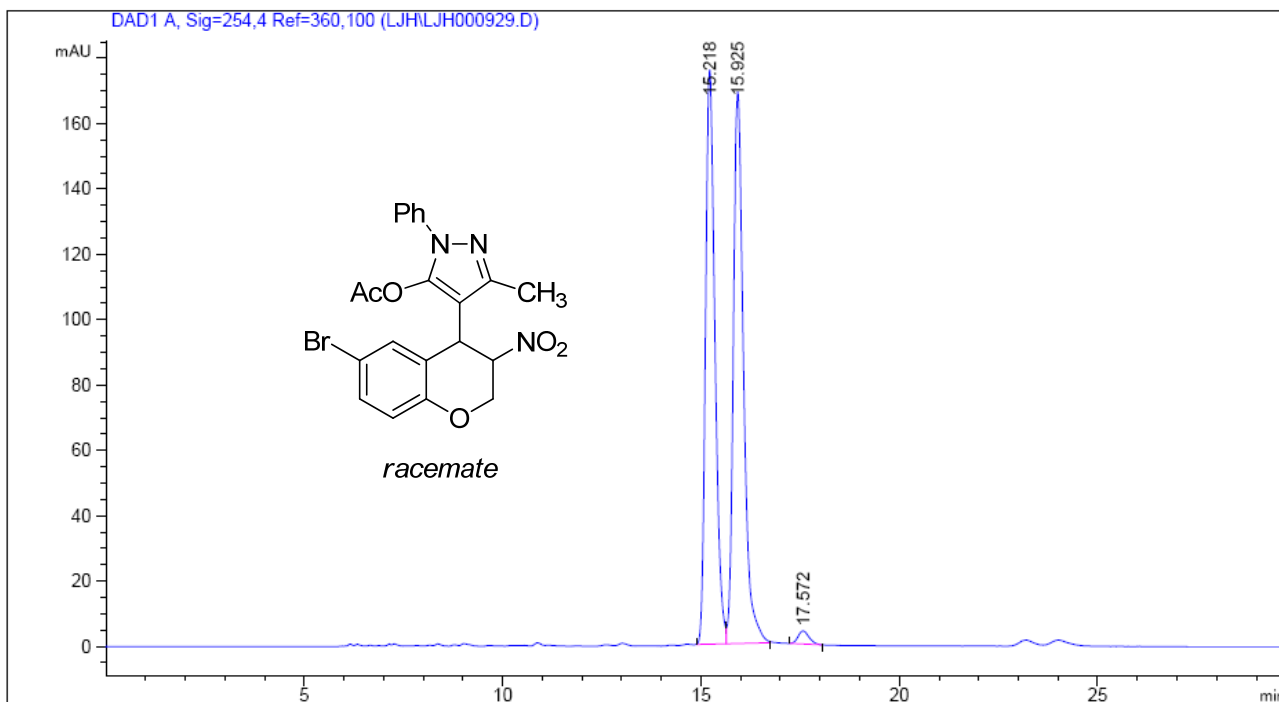

| Peak # | RetTime [min] | Type | Width [min] | Area [mAU*s] | Height [mAU] | Area %  |
|--------|---------------|------|-------------|--------------|--------------|---------|
| 1      | 15.218        | BV   | 0.2522      | 2895.79297   | 175.79591    | 48.3017 |
| 2      | 15.925        | VB   | 0.2728      | 3021.93799   | 168.86446    | 50.4058 |
| 3      | 17.572        | BB   | 0.2873      | 77.48293     | 4.01186      | 1.2924  |

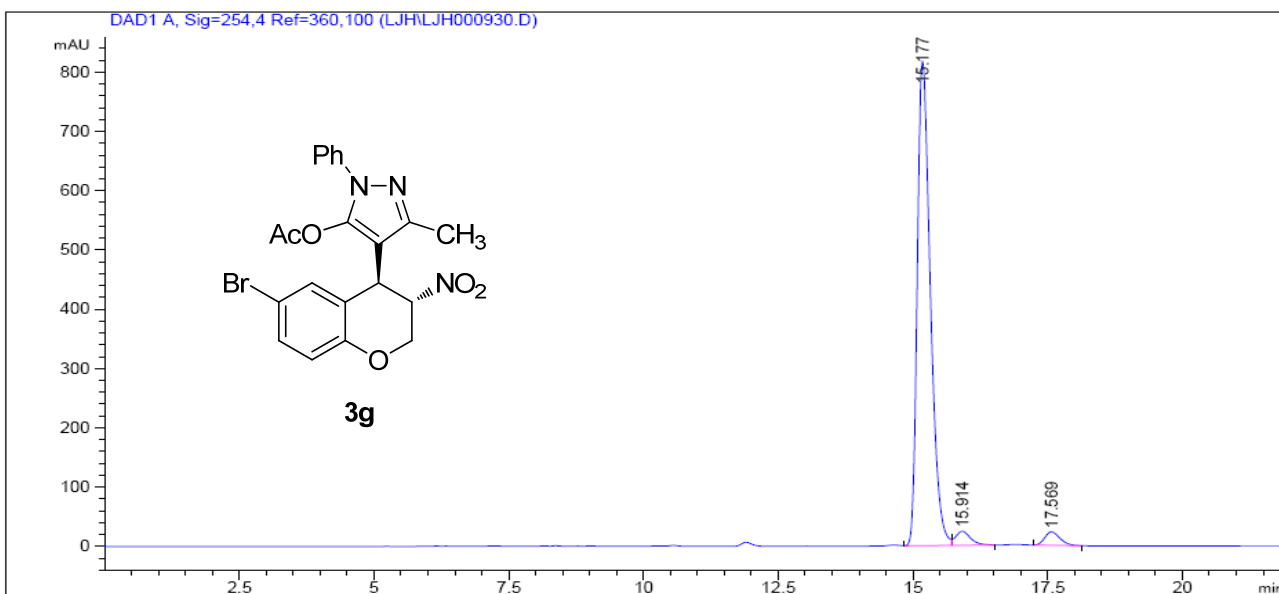

| Peak # | RetTime [min] | Type | Width [min] | Area [mAU*s] | Height [mAU] | Area %  |
|--------|---------------|------|-------------|--------------|--------------|---------|
| 1      | 15.177        | VV   | 0.2586      | 1.37758e4    | 817.64441    | 93.7867 |
| 2      | 15.914        | VB   | 0.2890      | 467.78198    | 24.03688     | 3.1847  |
| 3      | 17.569        | BB   | 0.3017      | 444.85007    | 22.78969     | 3.0286  |



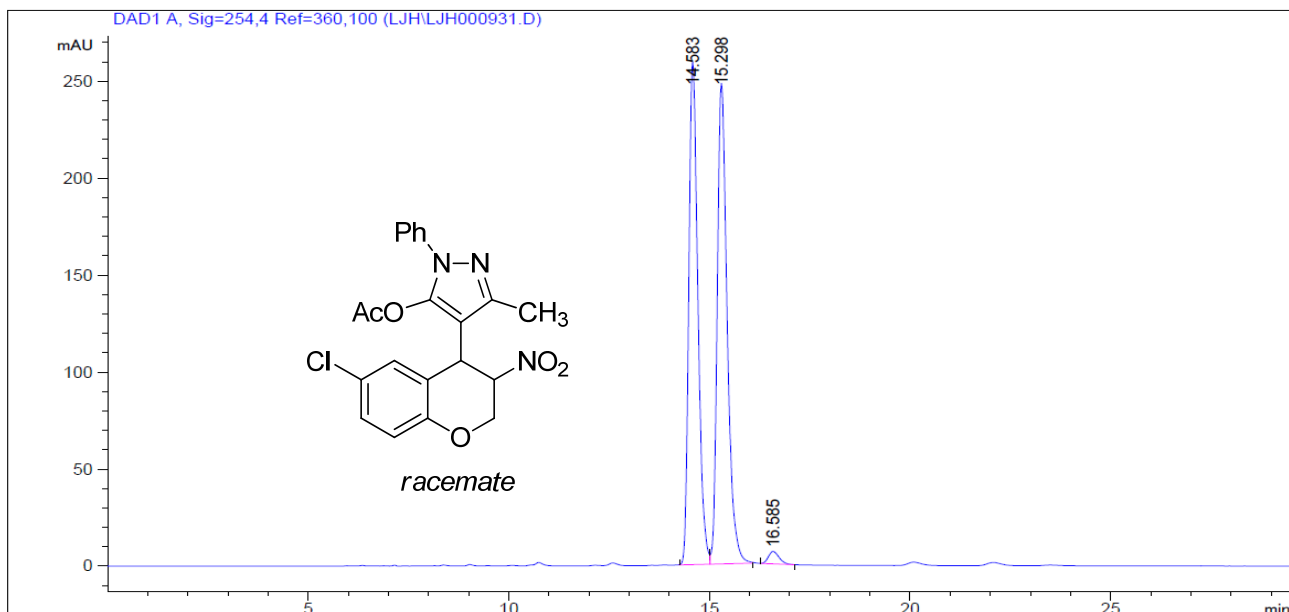

| Peak # | RetTime [min] | Type | Width [min] | Area [mAU*s] | Height [mAU] | Area %  |
|--------|---------------|------|-------------|--------------|--------------|---------|
| 1      | 14.583        | BV   | 0.2413      | 4072.42456   | 259.20169    | 48.2973 |
| 2      | 15.298        | VB   | 0.2597      | 4240.72314   | 247.80511    | 50.2933 |
| 3      | 16.585        | BB   | 0.2826      | 118.84338    | 6.46117      | 1.4094  |

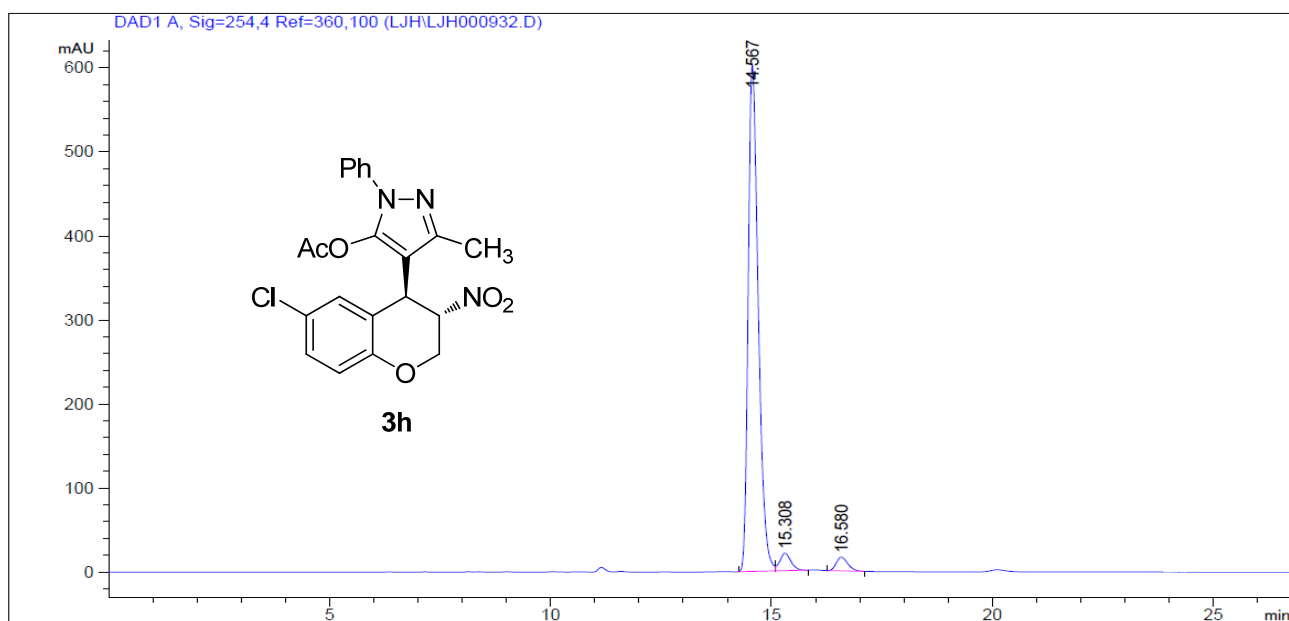

| Peak # | RetTime [min] | Type | Width [min] | Area [mAU*s] | Height [mAU] | Area %  |
|--------|---------------|------|-------------|--------------|--------------|---------|
| 1      | 14.567        | BV   | 0.2429      | 9545.64551   | 602.19897    | 93.5743 |
| 2      | 15.308        | VB   | 0.2622      | 359.24765    | 20.72620     | 3.5216  |
| 3      | 16.580        | BB   | 0.2807      | 296.24612    | 16.40017     | 2.9040  |

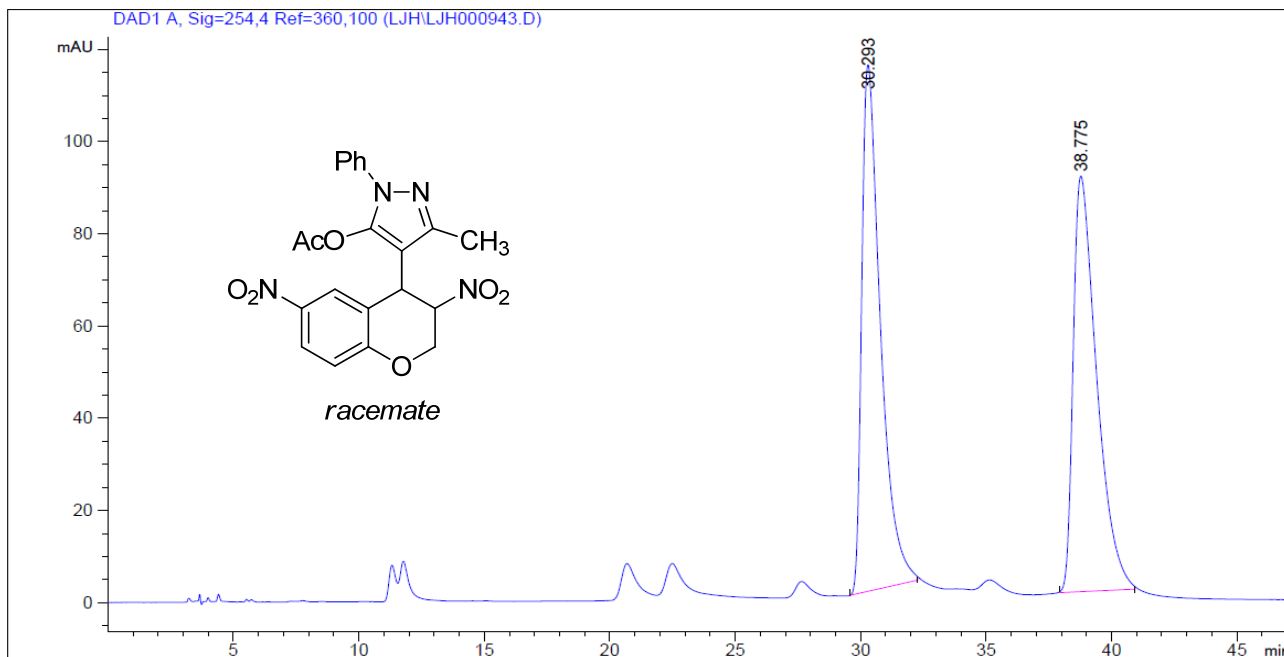

| Peak # | RetTime [min] | Type | Width [min] | Area [mAU*s] | Height [mAU] | Area %  |
|--------|---------------|------|-------------|--------------|--------------|---------|
| 1      | 30.293        | BB   | 0.7688      | 5939.30420   | 114.18889    | 50.4032 |
| 2      | 38.775        | BB   | 0.9647      | 5844.28174   | 90.11191     | 49.5968 |

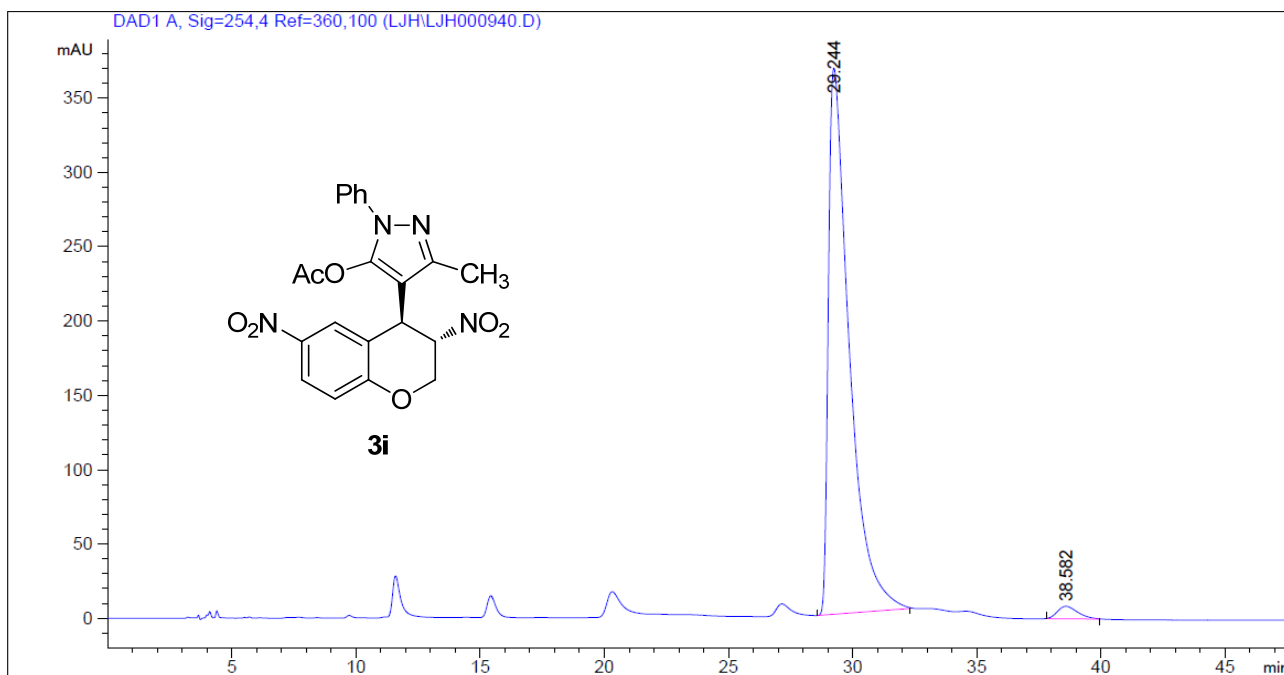

| Peak # | RetTime [min] | Type | Width [min] | Area [mAU*s] | Height [mAU] | Area %  |
|--------|---------------|------|-------------|--------------|--------------|---------|
| 1      | 29.244        | BB   | 0.8478      | 2.14767e4    | 367.48145    | 97.8217 |
| 2      | 38.582        | BB   | 0.8259      | 478.23456    | 8.42883      | 2.1783  |

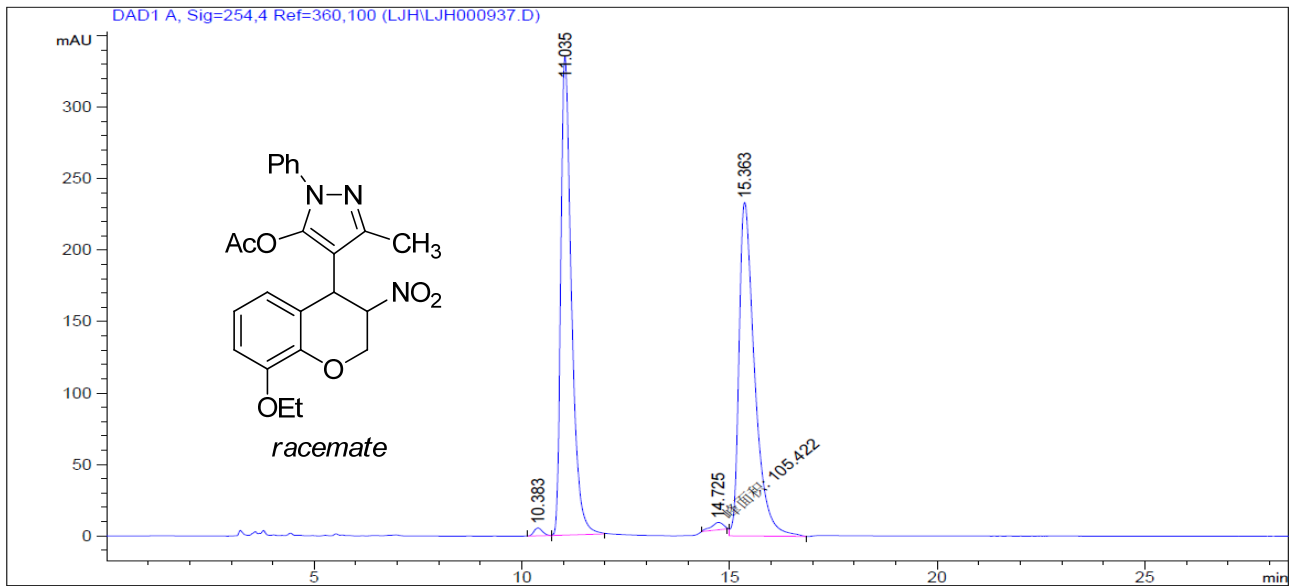

| Peak # | RetTime [min] | Type | Width [min] | Area [mAU*s] | Height [mAU] | Area %  |
|--------|---------------|------|-------------|--------------|--------------|---------|
| 1      | 10.383        | BV   | 0.2130      | 78.19690     | 5.66669      | 0.6380  |
| 2      | 11.035        | VB   | 0.2681      | 5980.06689   | 335.25568    | 48.7888 |
| 3      | 14.725        | MM T | 0.3377      | 105.42249    | 5.20222      | 0.8601  |
| 4      | 15.363        | VB   | 0.3904      | 6093.37354   | 233.56941    | 49.7132 |

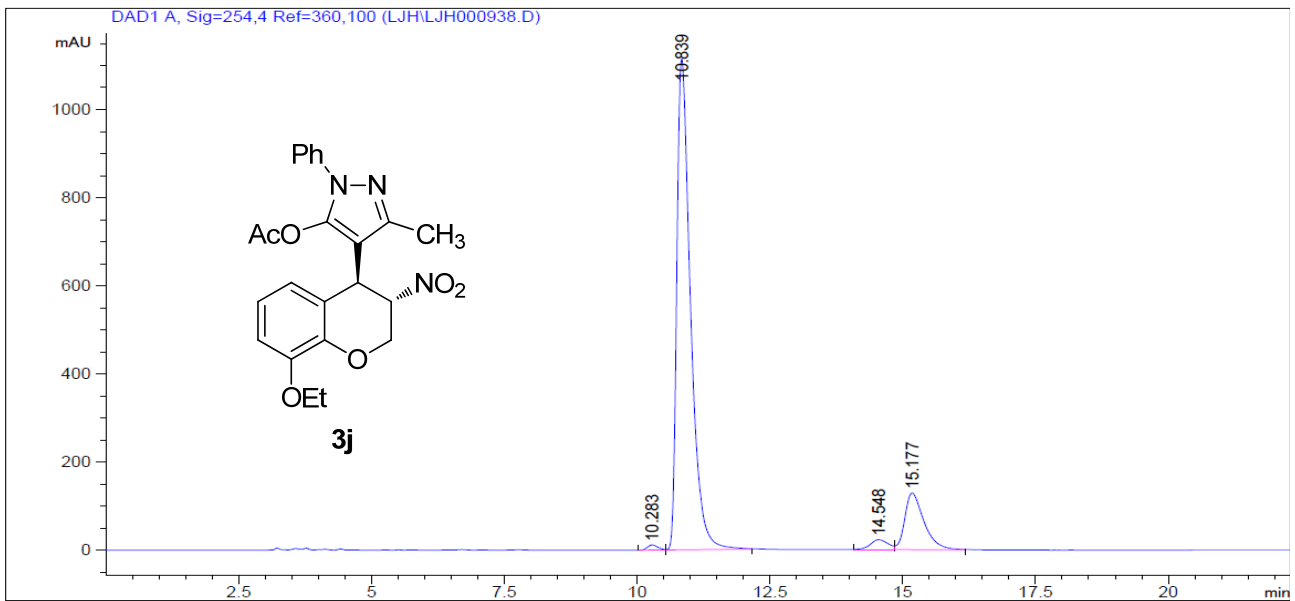

| Peak # | RetTime [min] | Type | Width [min] | Area [mAU*s] | Height [mAU] | Area %  |
|--------|---------------|------|-------------|--------------|--------------|---------|
| 1      | 10.283        | BV   | 0.2110      | 160.24634    | 11.75698     | 0.6724  |
| 2      | 10.839        | VB   | 0.2705      | 1.99278e4    | 1115.20227   | 83.6125 |
| 3      | 14.548        | BV   | 0.3559      | 518.53271    | 22.41557     | 2.1756  |
| 4      | 15.177        | VB   | 0.3771      | 3226.94312   | 128.45760    | 13.5395 |

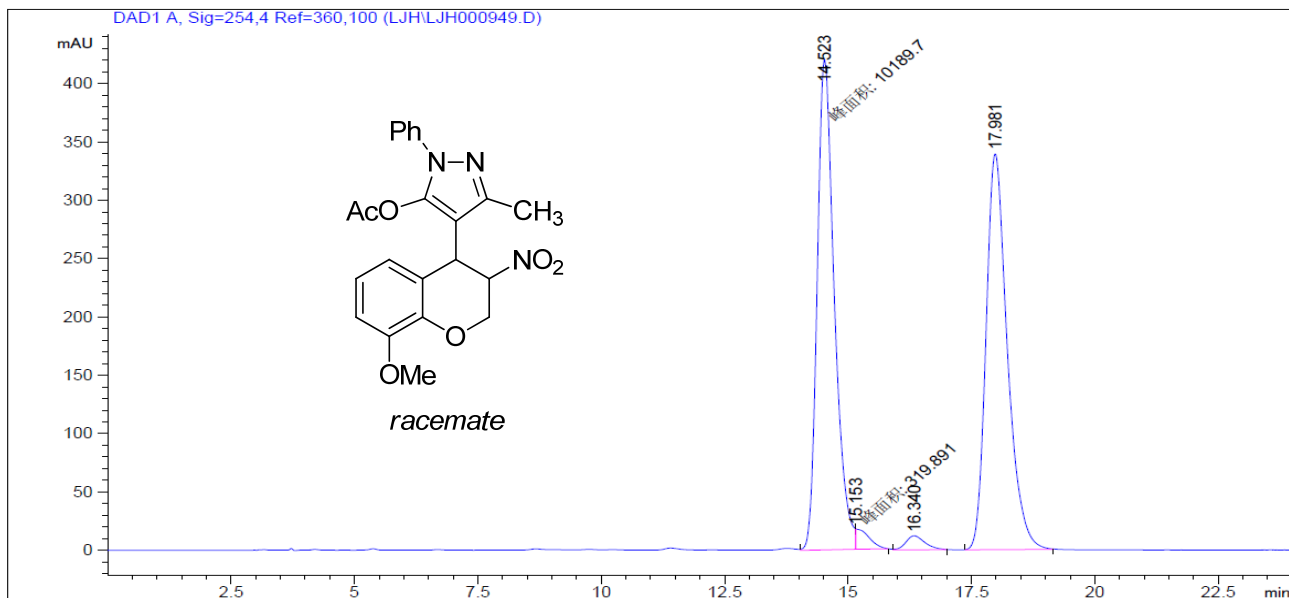

| Peak # | RetTime [min] | Type | Width [min] | Area [mAU*s] | Height [mAU] | Area %  |
|--------|---------------|------|-------------|--------------|--------------|---------|
| 1      | 14.523        | MM T | 0.4040      | 1.01897e4    | 420.32669    | 48.5293 |
| 2      | 15.153        | MM T | 0.2267      | 319.89078    | 17.51497     | 1.5235  |
| 3      | 16.340        | BB   | 0.4012      | 321.28116    | 12.04548     | 1.5301  |
| 4      | 17.981        | BB   | 0.4537      | 1.01662e4    | 339.18747    | 48.4170 |

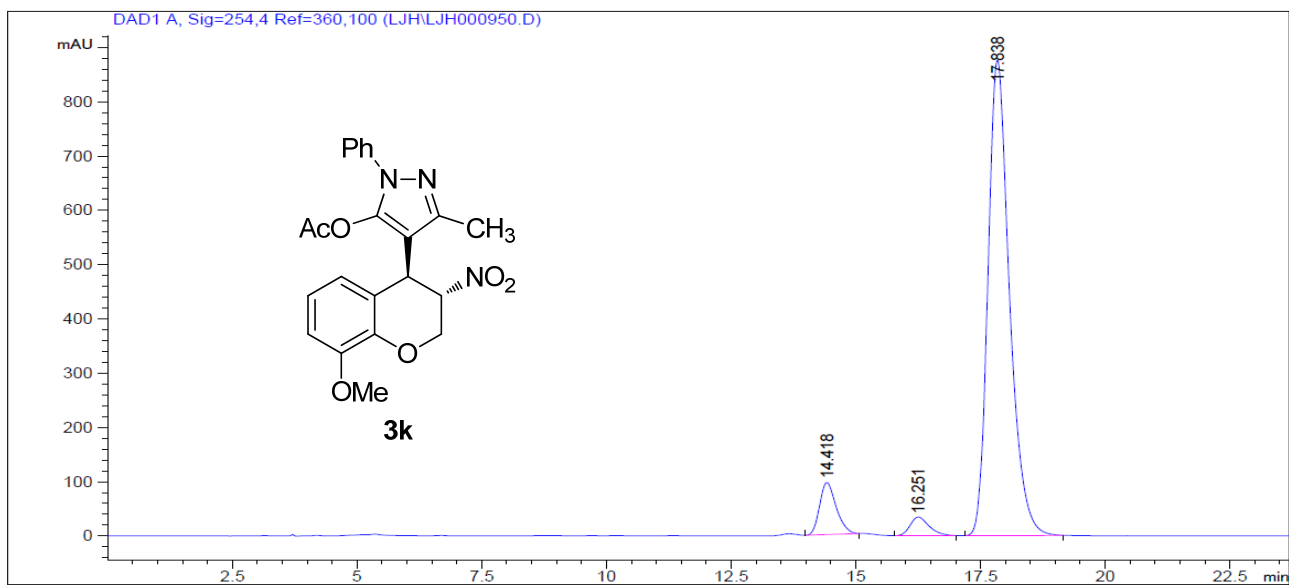

| Peak # | RetTime [min] | Type | Width [min] | Area [mAU*s] | Height [mAU] | Area %  |
|--------|---------------|------|-------------|--------------|--------------|---------|
| 1      | 14.418        | VB   | 0.3514      | 2217.72510   | 96.03005     | 7.5558  |
| 2      | 16.251        | BB   | 0.4023      | 913.08197    | 34.33459     | 3.1109  |
| 3      | 17.838        | BB   | 0.4530      | 2.62206e4    | 876.54102    | 89.3334 |

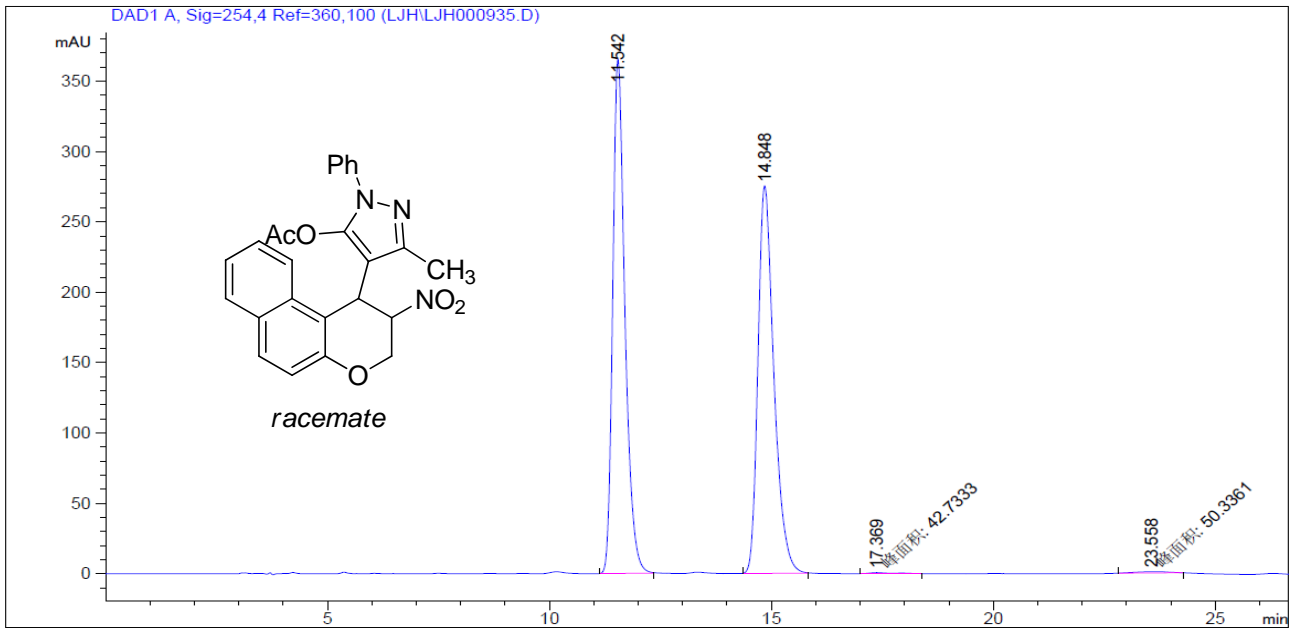

| Peak # | RetTime [min] | Type | Width [min] | Area [mAU*s] | Height [mAU] | Area %  |
|--------|---------------|------|-------------|--------------|--------------|---------|
| 1      | 11.542        | BB   | 0.2890      | 6988.13477   | 365.60602    | 50.0565 |
| 2      | 14.848        | BB   | 0.3775      | 6879.29834   | 275.36487    | 49.2769 |
| 3      | 17.369        | MM T | 0.7941      | 42.73328     | 8.96930e-1   | 0.3061  |
| 4      | 23.558        | MM T | 0.8885      | 50.33610     | 9.44263e-1   | 0.3606  |

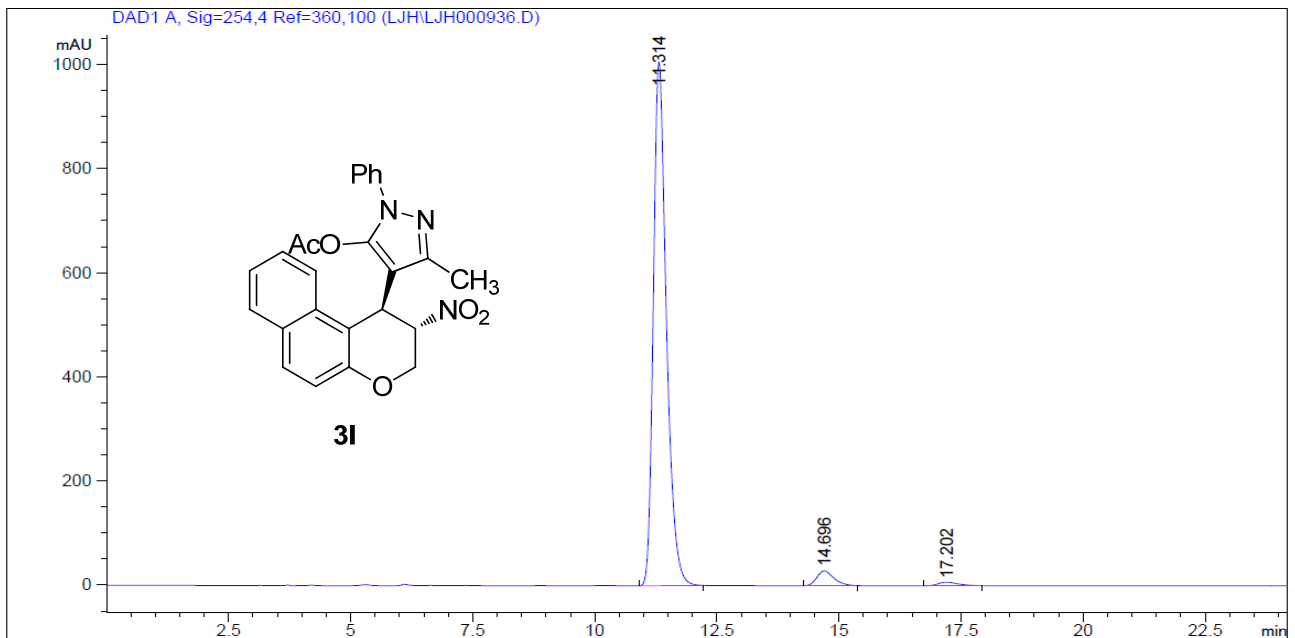

| Peak # | RetTime [min] | Type | Width [min] | Area [mAU*s] | Height [mAU] | Area %  |
|--------|---------------|------|-------------|--------------|--------------|---------|
| 1      | 11.314        | BB   | 0.2802      | 1.86409e4    | 1006.06665   | 95.3873 |
| 2      | 14.696        | BB   | 0.3689      | 698.48407    | 28.60257     | 3.5742  |
| 3      | 17.202        | BB   | 0.4310      | 202.94693    | 6.94380      | 1.0385  |

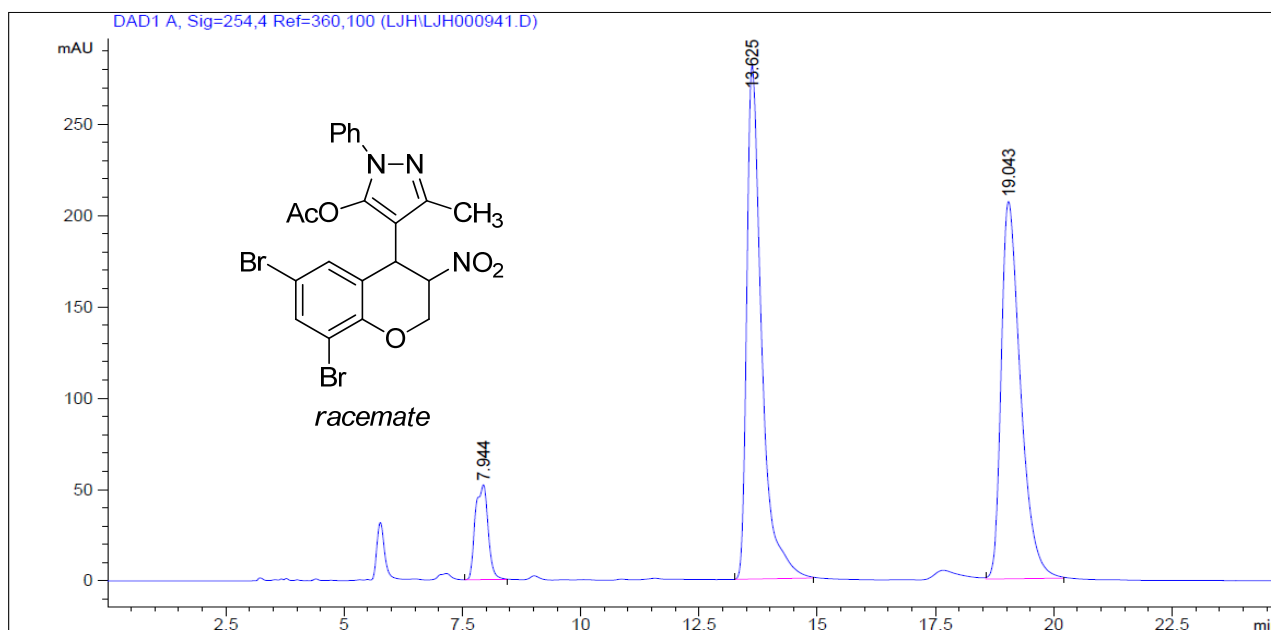

| Peak # | RetTime [min] | Type | Width [min] | Area [mAU*s] | Height [mAU] | Area %  |
|--------|---------------|------|-------------|--------------|--------------|---------|
| 1      | 7.944         | VB   | 0.2537      | 969.41046    | 51.94637     | 7.4544  |
| 2      | 13.625        | BB   | 0.3273      | 6155.04590   | 281.32617    | 47.3298 |
| 3      | 19.043        | BB   | 0.4322      | 5880.14404   | 206.51729    | 45.2159 |

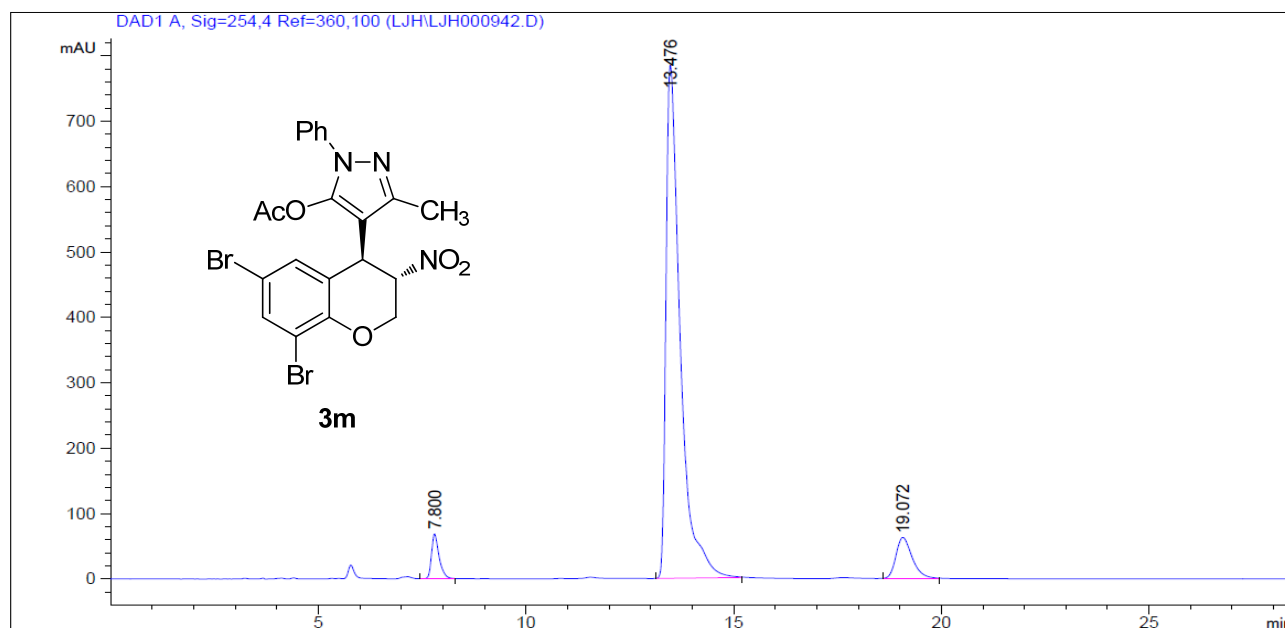

| Peak # | RetTime [min] | Type | Width [min] | Area [mAU*s] | Height [mAU] | Area %  |
|--------|---------------|------|-------------|--------------|--------------|---------|
| 1      | 7.800         | VB   | 0.1876      | 868.34729    | 68.64314     | 4.0899  |
| 2      | 13.476        | BB   | 0.3514      | 1.86623e4    | 784.95703    | 87.8995 |
| 3      | 19.072        | BB   | 0.4162      | 1700.75464   | 62.74880     | 8.0105  |

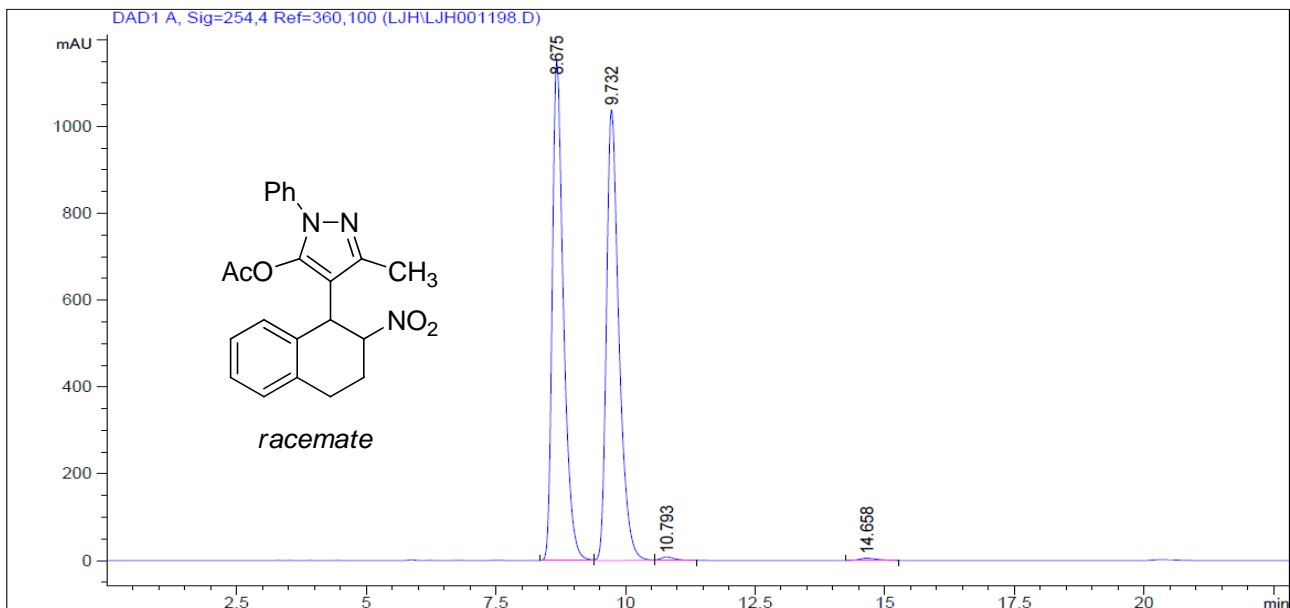

| Peak # | RetTime [min] | Type | Width [min] | Area [mAU*s] | Height [mAU] | Area %  |
|--------|---------------|------|-------------|--------------|--------------|---------|
| 1      | 8.675         | BV   | 0.2253      | 1.73021e4    | 1151.75610   | 49.4300 |
| 2      | 9.732         | VB   | 0.2495      | 1.74095e4    | 1038.66602   | 49.7368 |
| 3      | 10.793        | BB   | 0.2765      | 152.83694    | 8.16014      | 0.4366  |
| 4      | 14.658        | BB   | 0.3654      | 138.81177    | 5.67385      | 0.3966  |

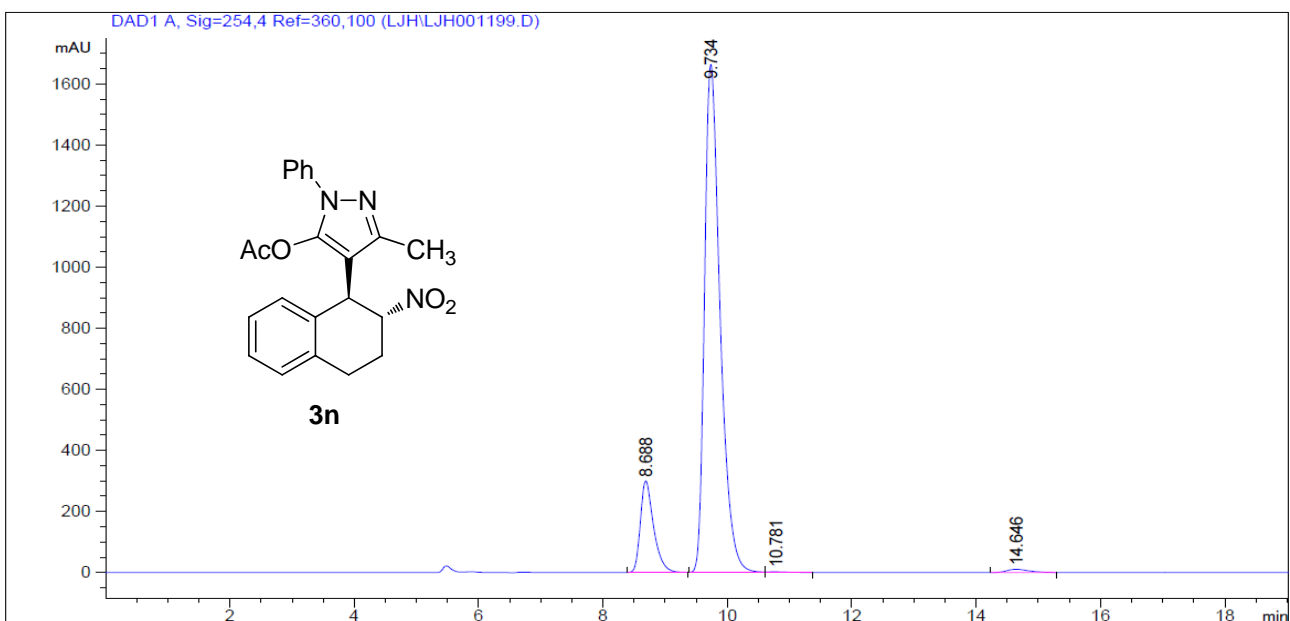

| Peak # | RetTime [min] | Type | Width [min] | Area [mAU*s] | Height [mAU] | Area %  |
|--------|---------------|------|-------------|--------------|--------------|---------|
| 1      | 8.688         | BB   | 0.2228      | 4443.10303   | 299.98254    | 13.1801 |
| 2      | 9.734         | BB   | 0.2630      | 2.89537e4    | 1663.89624   | 85.8891 |
| 3      | 10.781        | BB   | 0.2940      | 47.98732     | 2.27609      | 0.1424  |
| 4      | 14.646        | BB   | 0.3736      | 265.77264    | 10.70810     | 0.7884  |

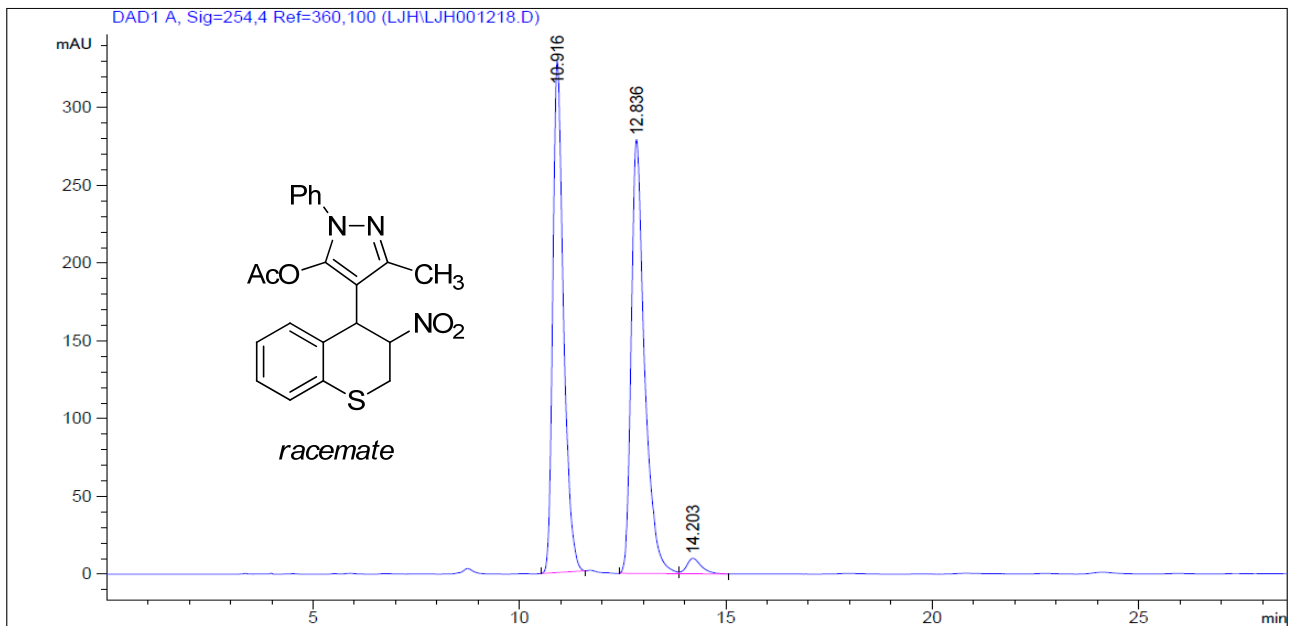

| Peak # | RetTime [min] | Type | Width [min] | Area [mAU*s] | Height [mAU] | Area %  |
|--------|---------------|------|-------------|--------------|--------------|---------|
| 1      | 10.916        | BB   | 0.2711      | 5953.88770   | 328.99158    | 47.7208 |
| 2      | 12.836        | BB   | 0.3324      | 6276.94189   | 279.12079    | 50.3101 |
| 3      | 14.203        | BB   | 0.3718      | 245.68704    | 10.02890     | 1.9692  |

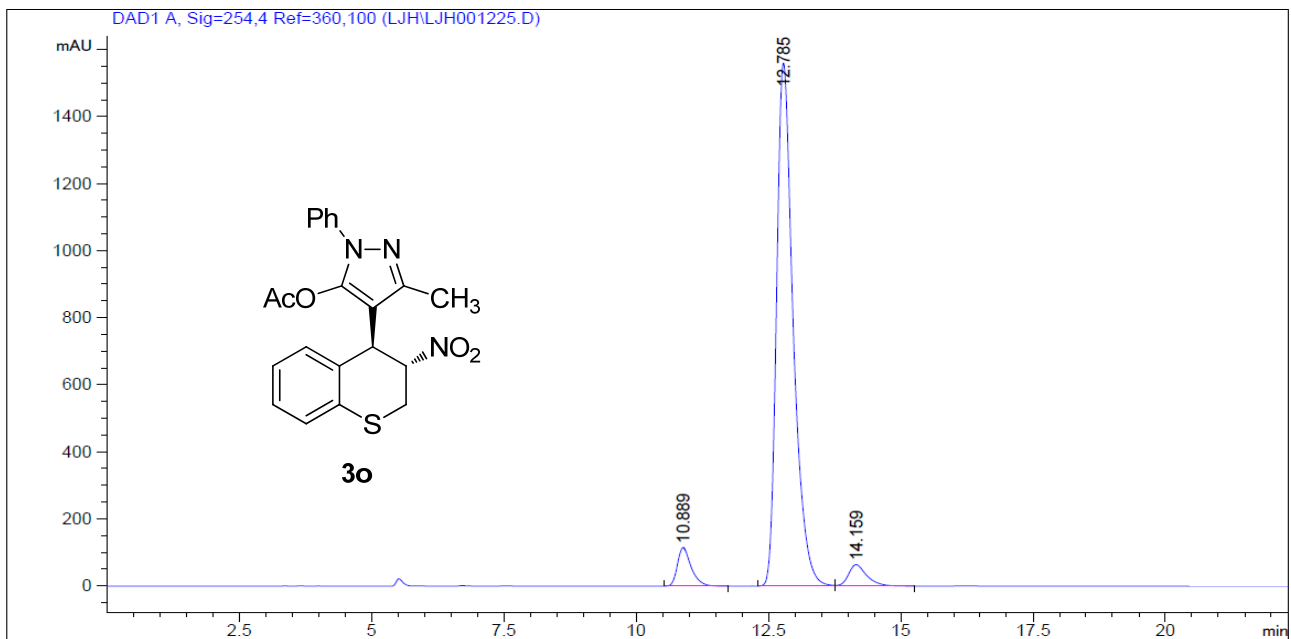

| Peak # | RetTime [min] | Type | Width [min] | Area [mAU*s] | Height [mAU] | Area %  |
|--------|---------------|------|-------------|--------------|--------------|---------|
| 1      | 10.889        | BB   | 0.2697      | 2082.86938   | 115.87124    | 5.5172  |
| 2      | 12.785        | BV   | 0.3311      | 3.41155e4    | 1560.22046   | 90.3659 |
| 3      | 14.159        | VB   | 0.3588      | 1554.23596   | 64.12645     | 4.1169  |



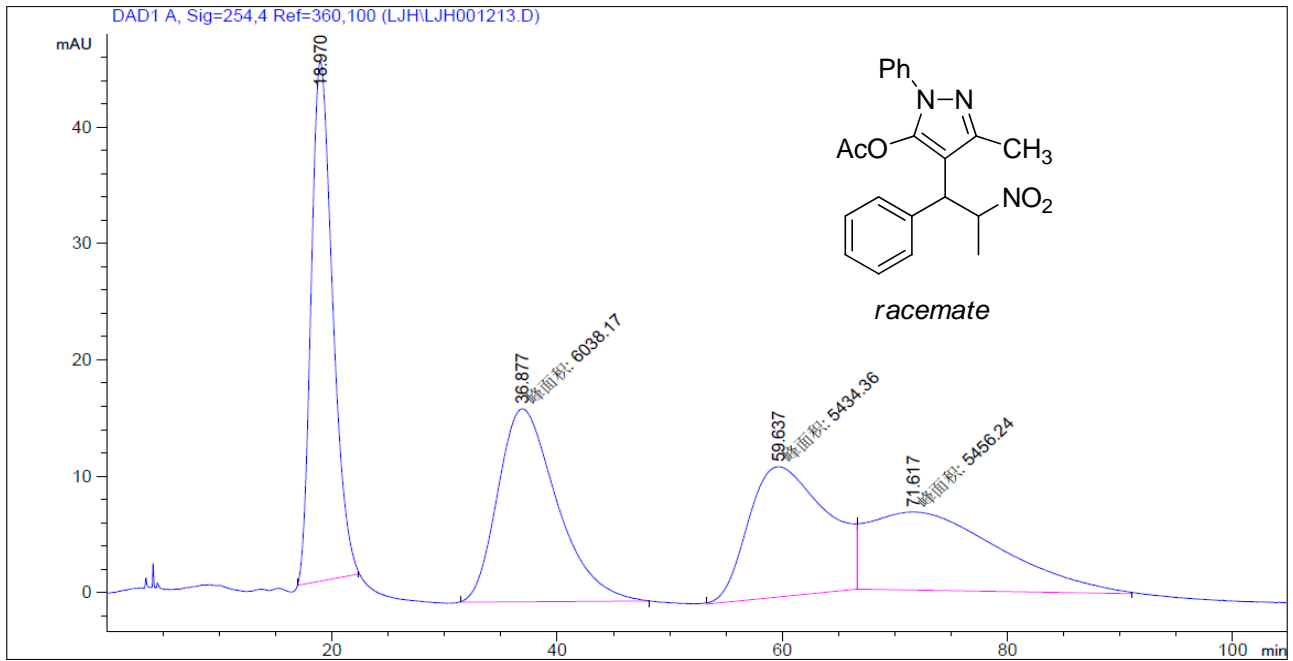

| Peak # | RetTime [min] | Type | Width [min] | Area [mAU*s] | Height [mAU] | Area %  |
|--------|---------------|------|-------------|--------------|--------------|---------|
| 1      | 18.970        | BB   | 1.6618      | 5921.86572   | 44.63595     | 25.9155 |
| 2      | 36.877        | MM T | 6.0658      | 6038.17480   | 16.59081     | 26.4245 |
| 3      | 59.637        | MM T | 8.0894      | 5434.36133   | 11.19650     | 23.7821 |
| 4      | 71.617        | MM T | 13.5522     | 5456.23926   | 6.71015      | 23.8778 |

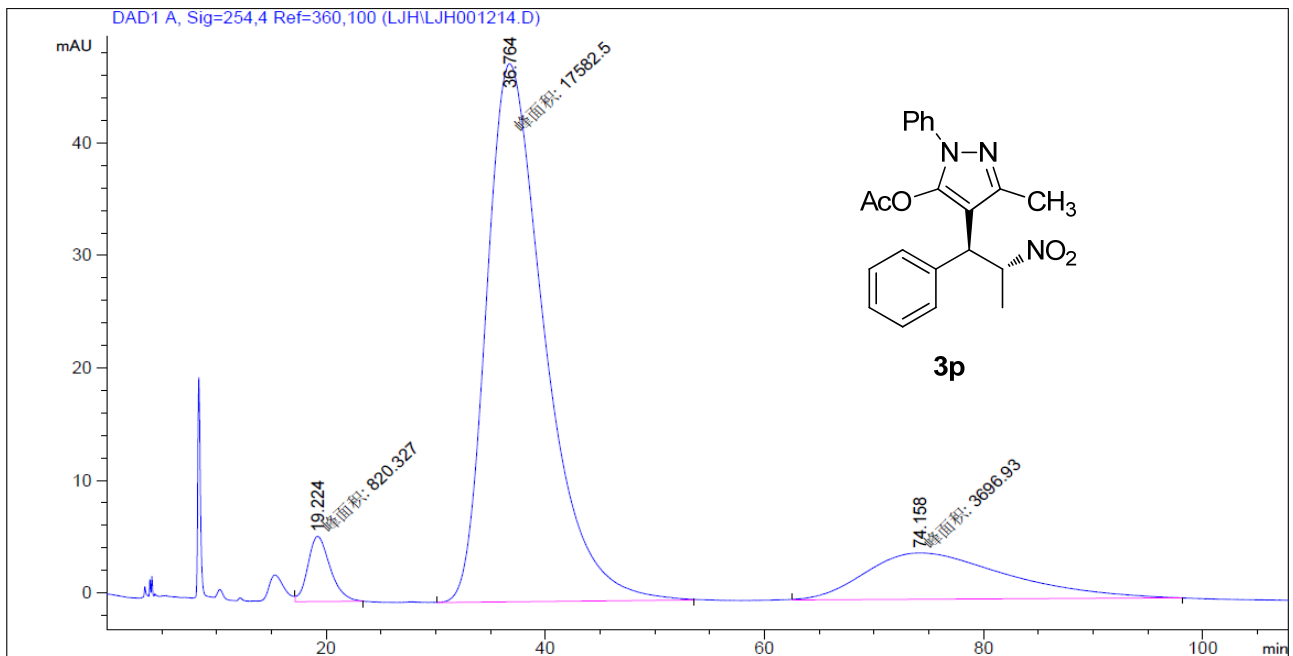

| Peak # | RetTime [min] | Type | Width [min] | Area [mAU*s] | Height [mAU] | Area %  |
|--------|---------------|------|-------------|--------------|--------------|---------|
| 1      | 19.224        | MM T | 2.3581      | 820.32660    | 5.79803      | 3.7119  |
| 2      | 36.764        | MM T | 6.1232      | 1.75825e4    | 47.85720     | 79.5597 |
| 3      | 74.158        | MM T | 14.9238     | 3696.92822   | 4.12866      | 16.7284 |

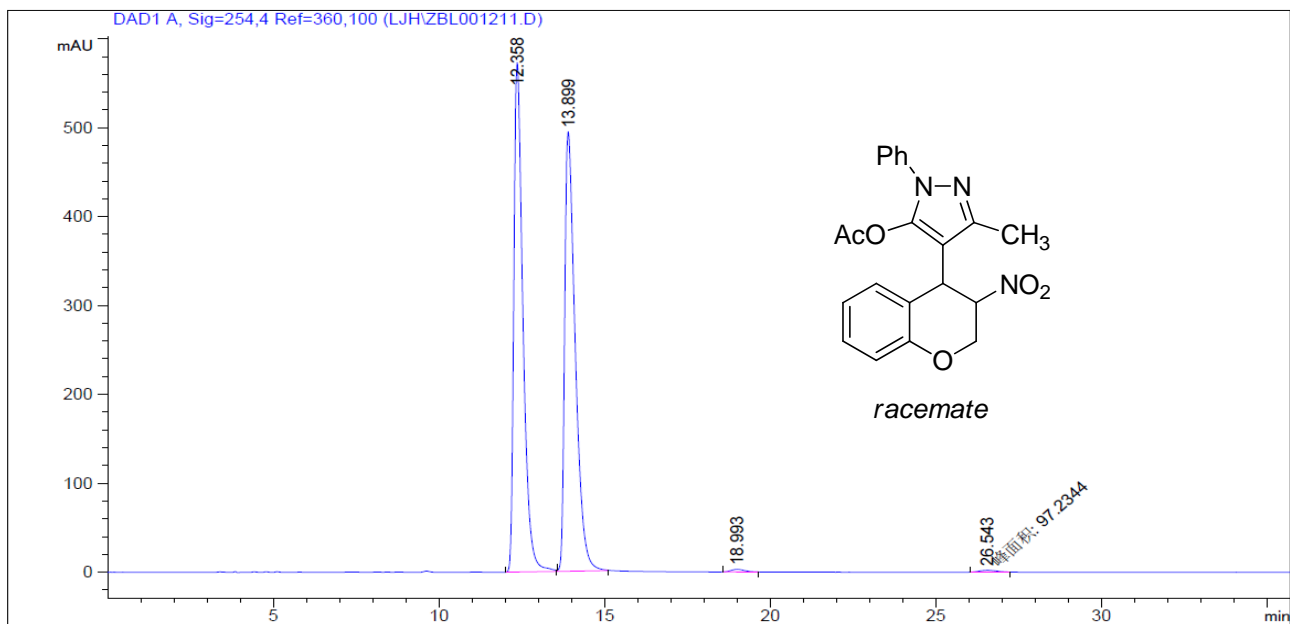

| Peak # | RetTime [min] | Type | Width [min] | Area [mAU*s] | Height [mAU] | Area %  |
|--------|---------------|------|-------------|--------------|--------------|---------|
| 1      | 12.358        | BB   | 0.2873      | 1.09746e4    | 573.29218    | 49.6322 |
| 2      | 13.899        | BB   | 0.3344      | 1.09541e4    | 494.63974    | 49.5393 |
| 3      | 18.993        | BB   | 0.3997      | 85.95161     | 3.02278      | 0.3887  |
| 4      | 26.543        | MM T | 0.6742      | 97.23435     | 2.40364      | 0.4397  |

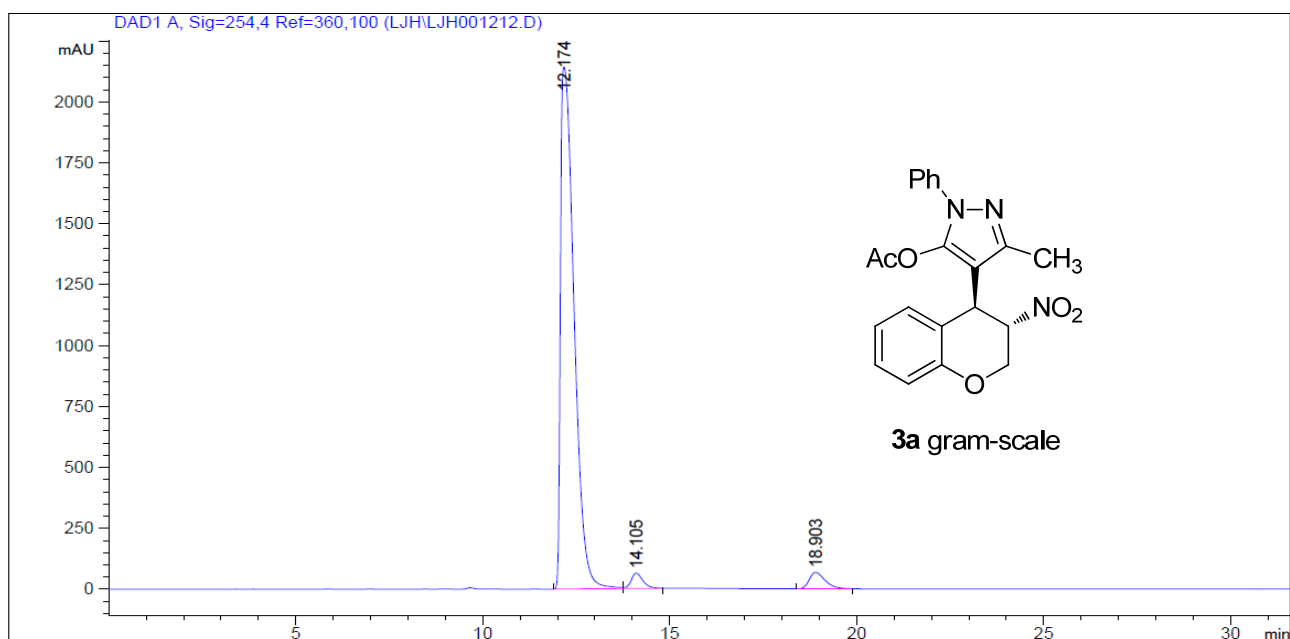

| Peak # | RetTime [min] | Type | Width [min] | Area [mAU*s] | Height [mAU] | Area %  |
|--------|---------------|------|-------------|--------------|--------------|---------|
| 1      | 12.174        | BB   | 0.3916      | 5.39359e4    | 2142.89673   | 94.1388 |
| 2      | 14.105        | BB   | 0.3299      | 1376.23254   | 63.24031     | 2.4021  |
| 3      | 18.903        | BB   | 0.4472      | 1981.88550   | 67.76789     | 3.4592  |

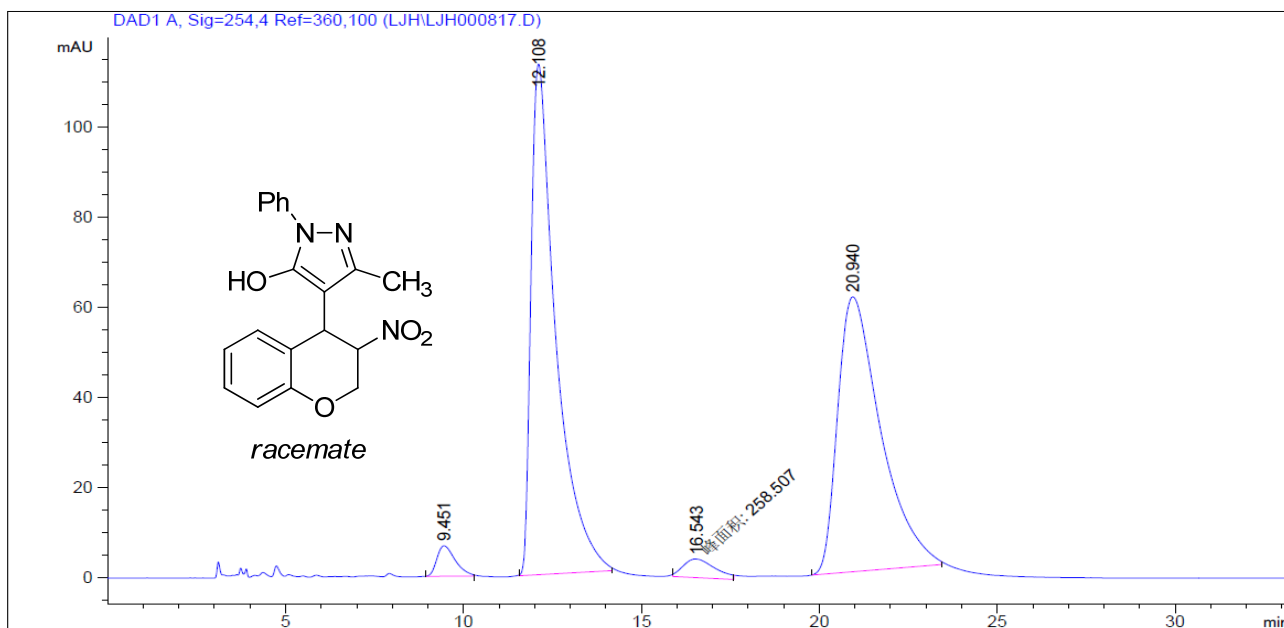

| Peak # | RetTime [min] | Type | Width [min] | Area [mAU*s] | Height [mAU] | Area %  |
|--------|---------------|------|-------------|--------------|--------------|---------|
| 1      | 9.451         | BB   | 0.5241      | 241.29678    | 6.76617      | 2.1675  |
| 2      | 12.108        | BB   | 0.6999      | 5493.77393   | 113.26569    | 49.3487 |
| 3      | 16.543        | MM T | 1.0374      | 258.50714    | 4.15311      | 2.3221  |
| 4      | 20.940        | BB   | 1.2174      | 5138.98438   | 60.96671     | 46.1617 |

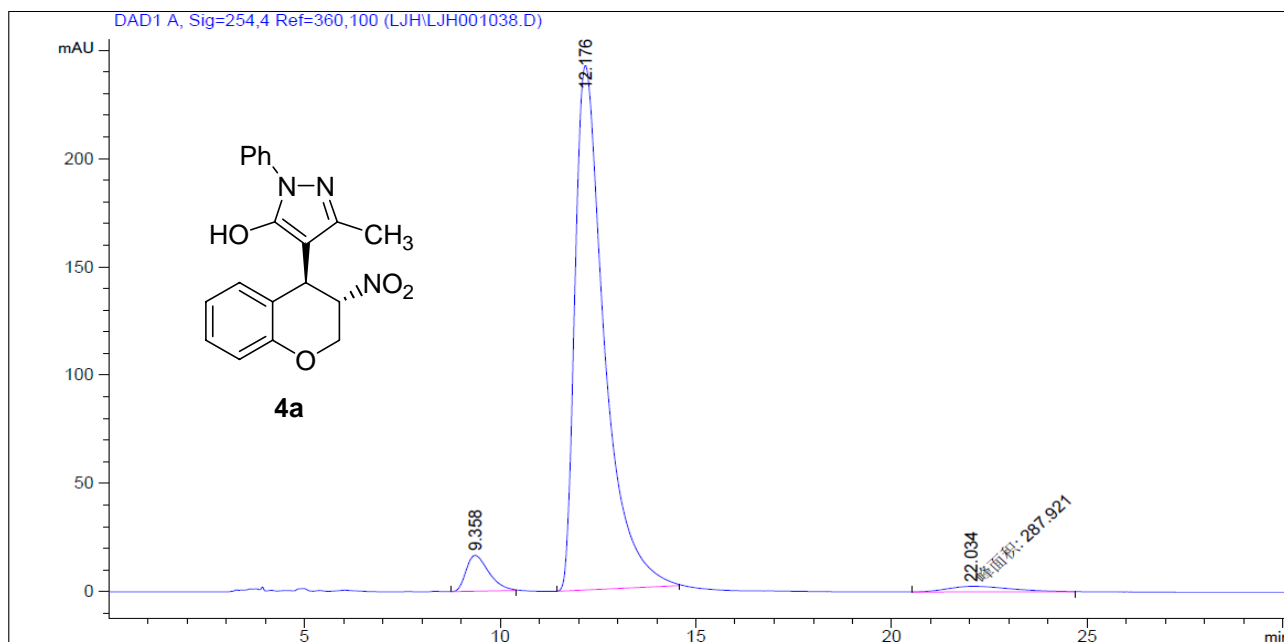

| Peak # | RetTime [min] | Type | Width [min] | Area [mAU*s] | Height [mAU] | Area %  |
|--------|---------------|------|-------------|--------------|--------------|---------|
| 1      | 9.358         | BB   | 0.6012      | 664.80646    | 16.52992     | 4.8944  |
| 2      | 12.176        | BB   | 0.7807      | 1.26302e4    | 242.06503    | 92.9859 |
| 3      | 22.034        | MM T | 1.8746      | 287.92090    | 2.55979      | 2.1197  |

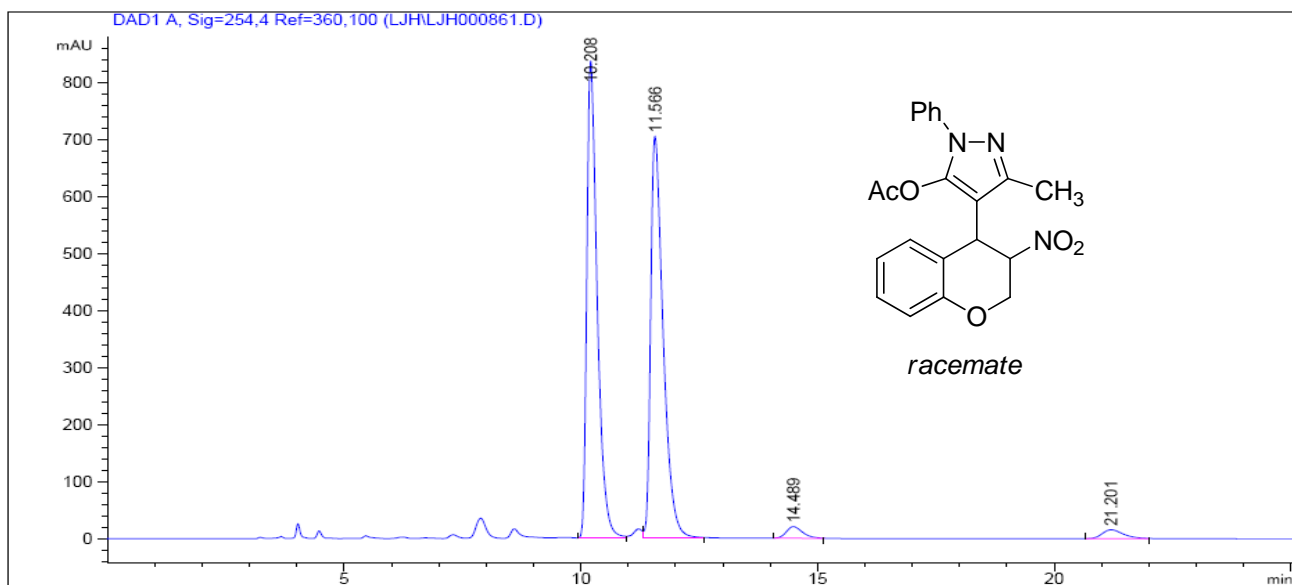

| Peak # | RetTime [min] | Type | Width [min] | Area [mAU*s] | Height [mAU] | Area %  |
|--------|---------------|------|-------------|--------------|--------------|---------|
| 1      | 10.208        | BV   | 0.2297      | 1.27380e4    | 836.39545    | 47.9487 |
| 2      | 11.566        | VB   | 0.2750      | 1.28584e4    | 704.38898    | 48.4018 |
| 3      | 14.489        | BB   | 0.3634      | 486.42966    | 20.45481     | 1.8310  |
| 4      | 21.201        | BB   | 0.4739      | 483.11777    | 15.57310     | 1.8186  |

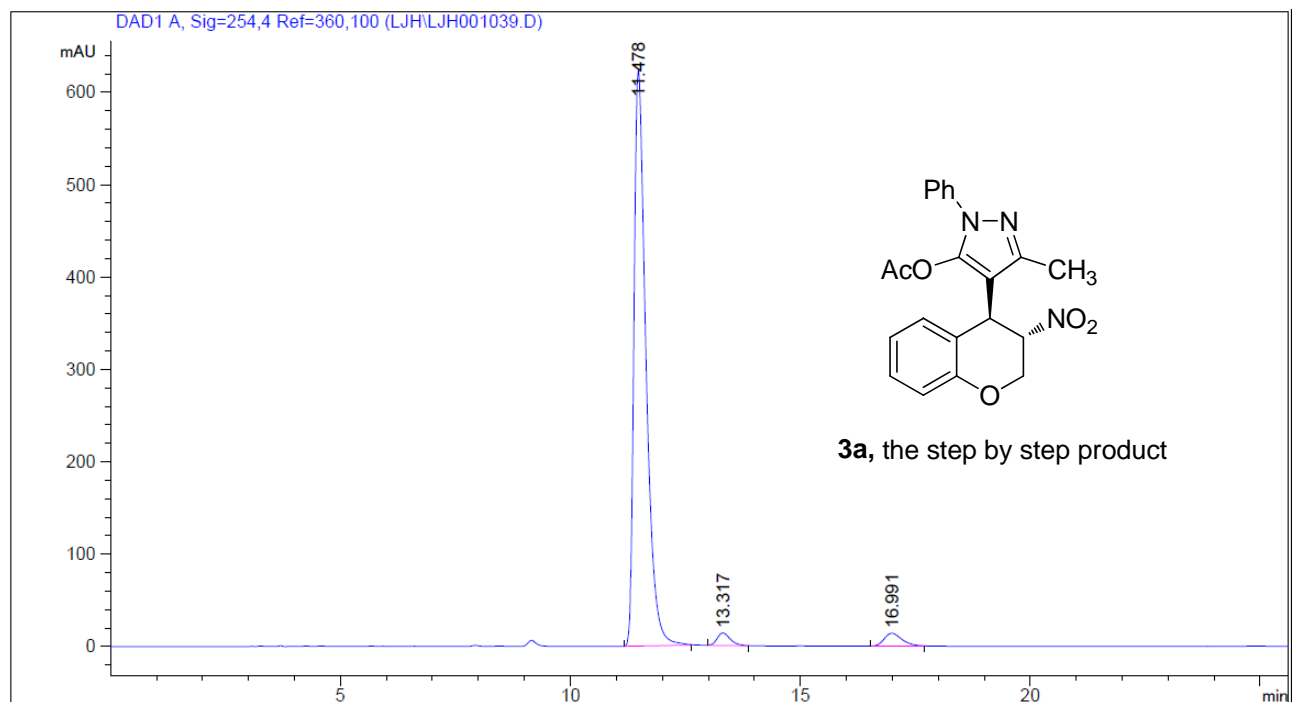

| Peak # | RetTime [min] | Type | Width [min] | Area [mAU*s] | Height [mAU] | Area %  |
|--------|---------------|------|-------------|--------------|--------------|---------|
| 1      | 11.478        | BB   | 0.2736      | 1.13007e4    | 623.09637    | 94.5934 |
| 2      | 13.317        | BB   | 0.3028      | 269.56384    | 13.62671     | 2.2564  |
| 3      | 16.991        | BB   | 0.4107      | 376.34366    | 13.95327     | 3.1502  |
